# Supplementary material for: Aza-Claisen rearrangement of 2-C-hydroxymethyl glycals as a versatile strategy towards synthesis of isofagomine and related biologically important azasugars
Source: Royal Society of Chemistry journal article supplement (doi:10.1039/c2ob06851f), 2012-01-01
Supplement: c2ob06851f.pdf [file c2ob06851f.pdf]

# **Aza-Claisen rearrangement on 2-C-hydroxymethyl glycals as a versatile Strategy towards Synthesis of isofagomine and related biologically important azasugars**

**Y. Suman Reddy, Pavan K Kancharla, Rashmi Roy and Yashwant D. Vankar<sup>\*a</sup>**

<sup>a</sup>Department of Chemistry, Indian Institute of Technology, Kanpur – 208 016, India.

E-mail: [yankar@iitk.ac.in](mailto:yankar@iitk.ac.in)

## **Contents List of the Supporting Information:**

| <b>Contents</b>          | <b>Page Number</b> |
|--------------------------|--------------------|
| NMR Spectra of compounds | 2-43               |

## NMR spectra of Compounds:

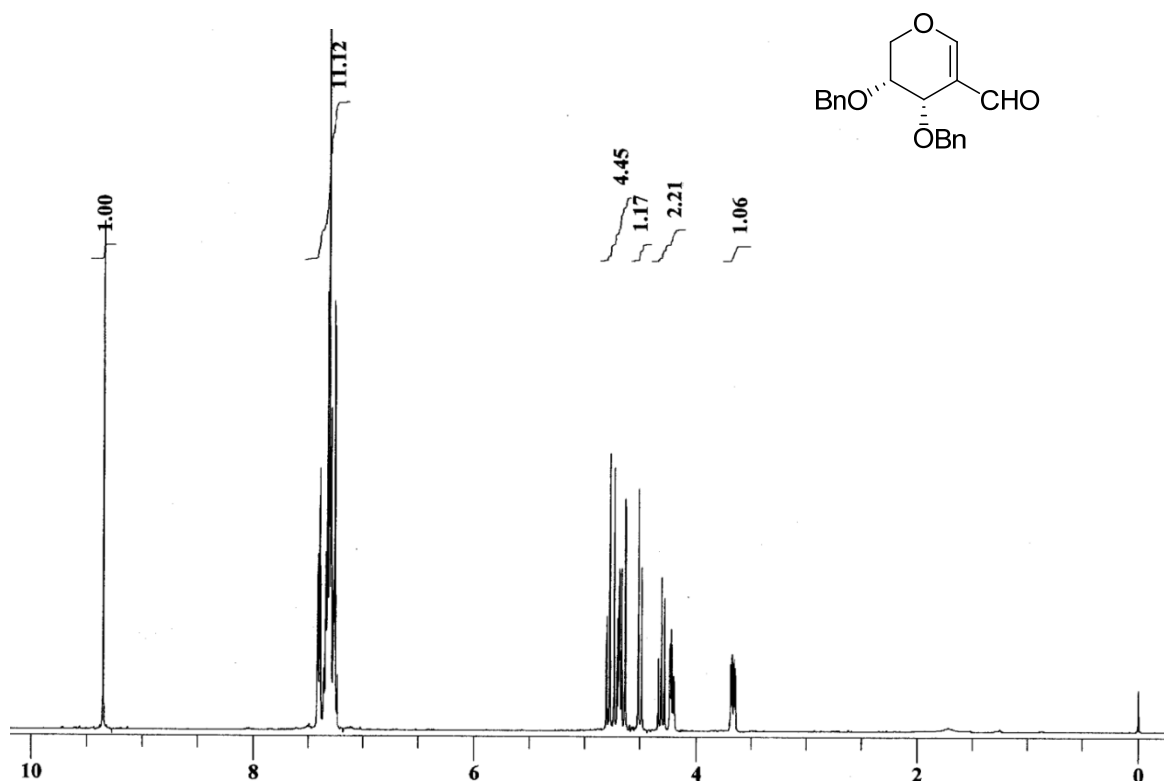

Figure 1: <sup>1</sup>H NMR (400 MHz) Spectrum of Compound 19

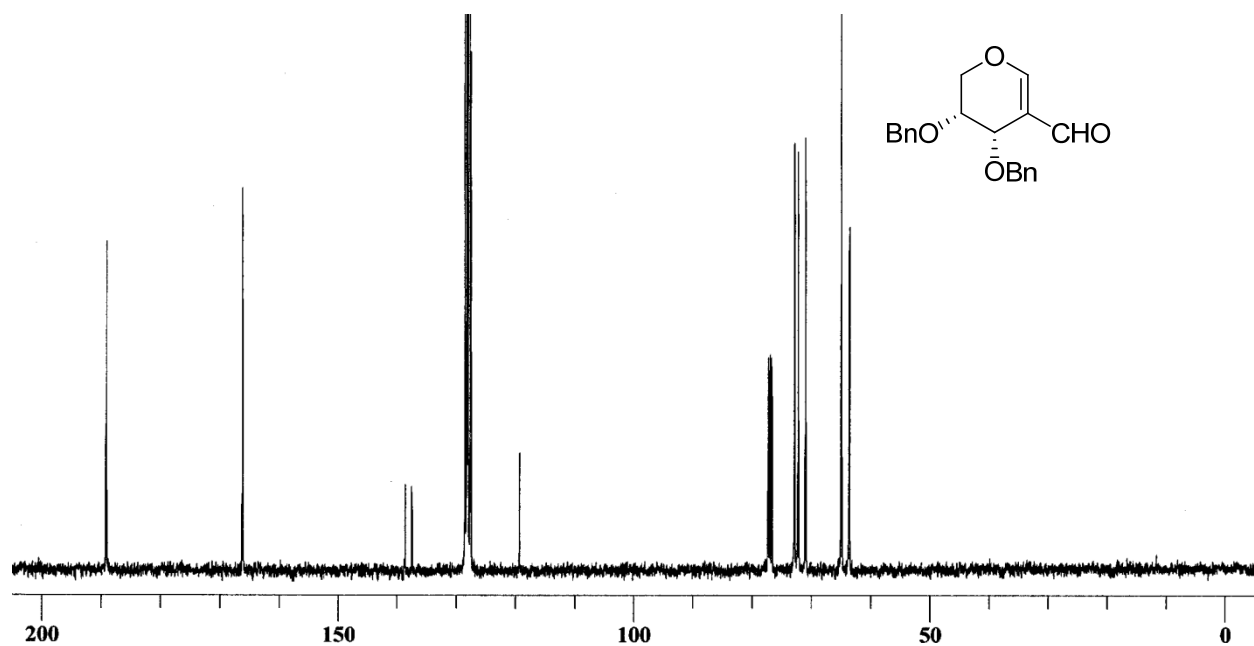

Figure 2: <sup>13</sup>C NMR (100 MHz) Spectrum of Compound 19

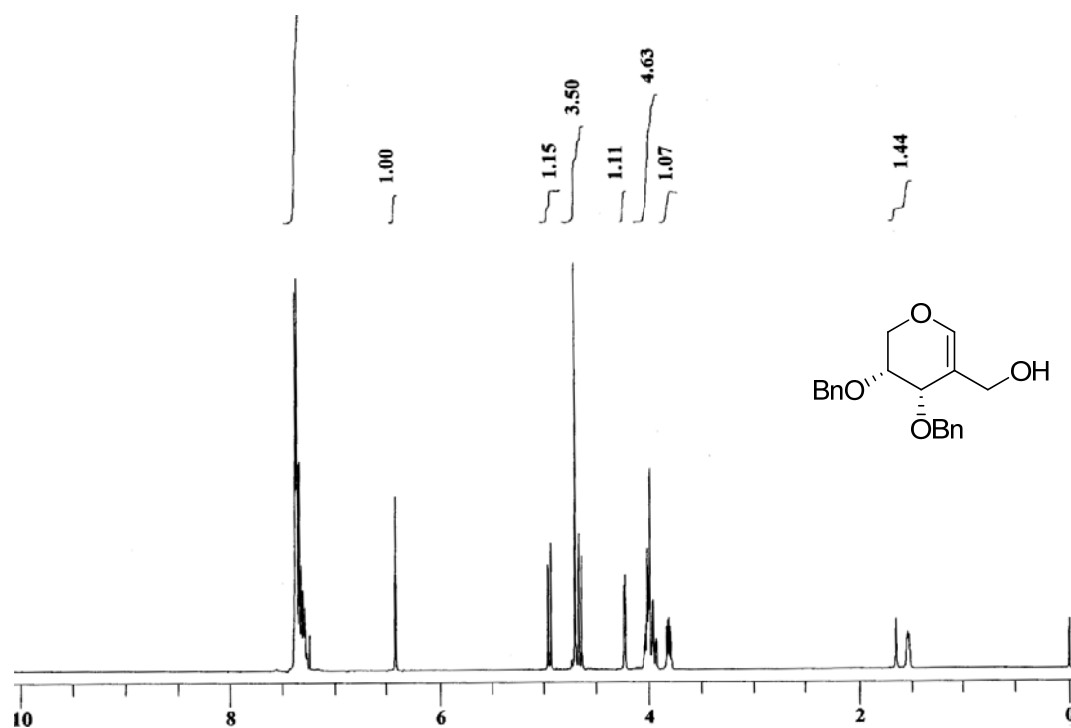

**Figure 3:**  $^1\text{H}$  NMR (400 MHz) Spectrum of Compound 20

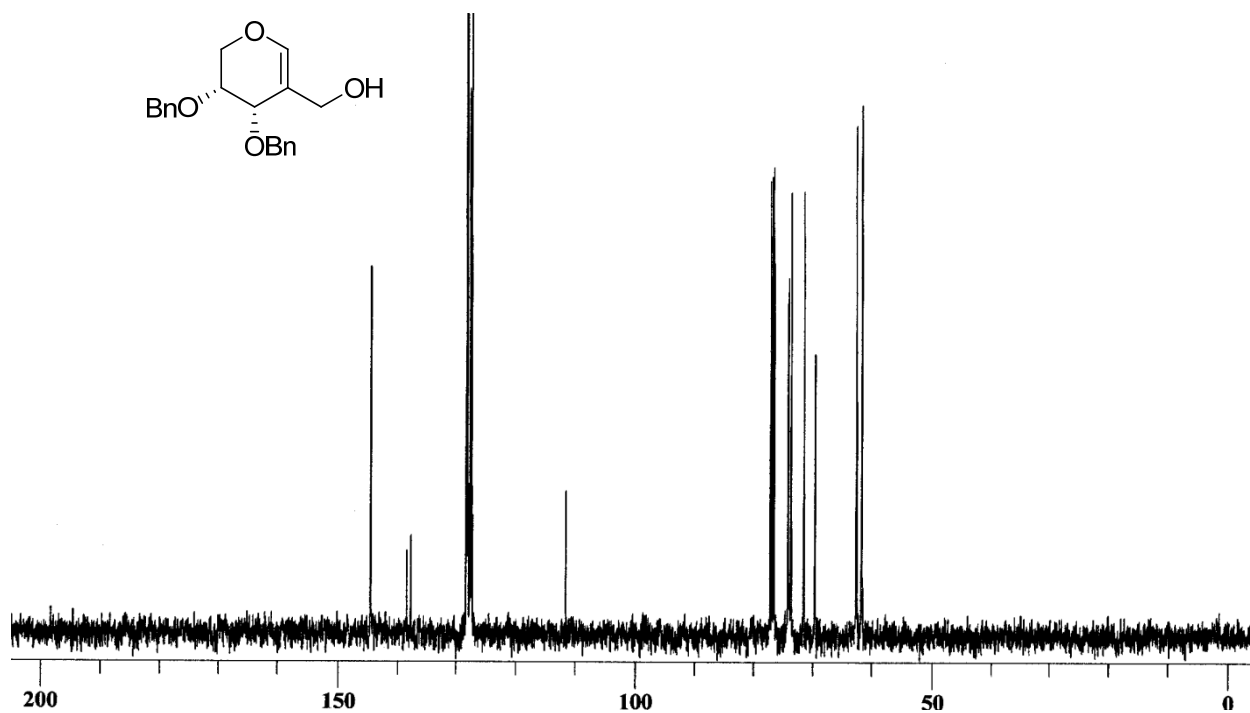

**Figure 4:**  $^{13}\text{C}$  NMR (100 MHz) Spectrum of Compound 20

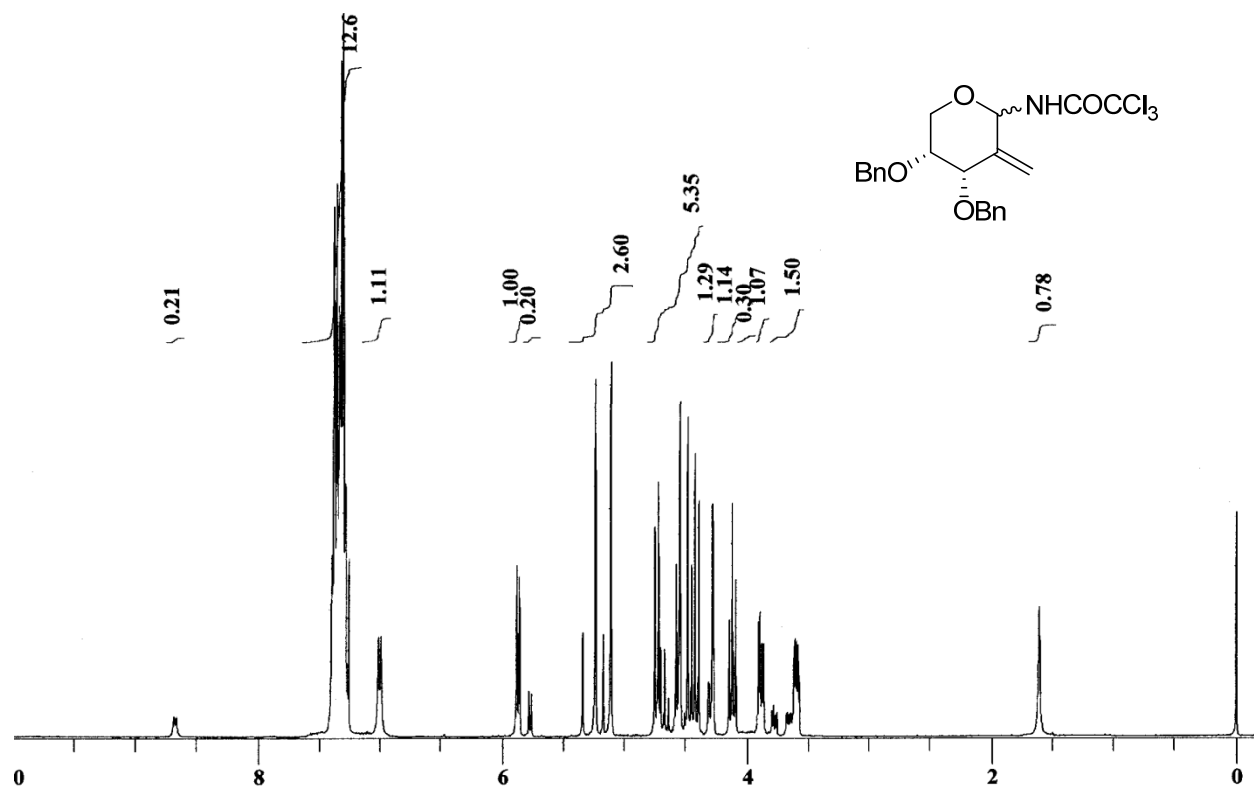

**Figure 5:** <sup>1</sup>H NMR (400 MHz) Spectrum of Compound 21a/b

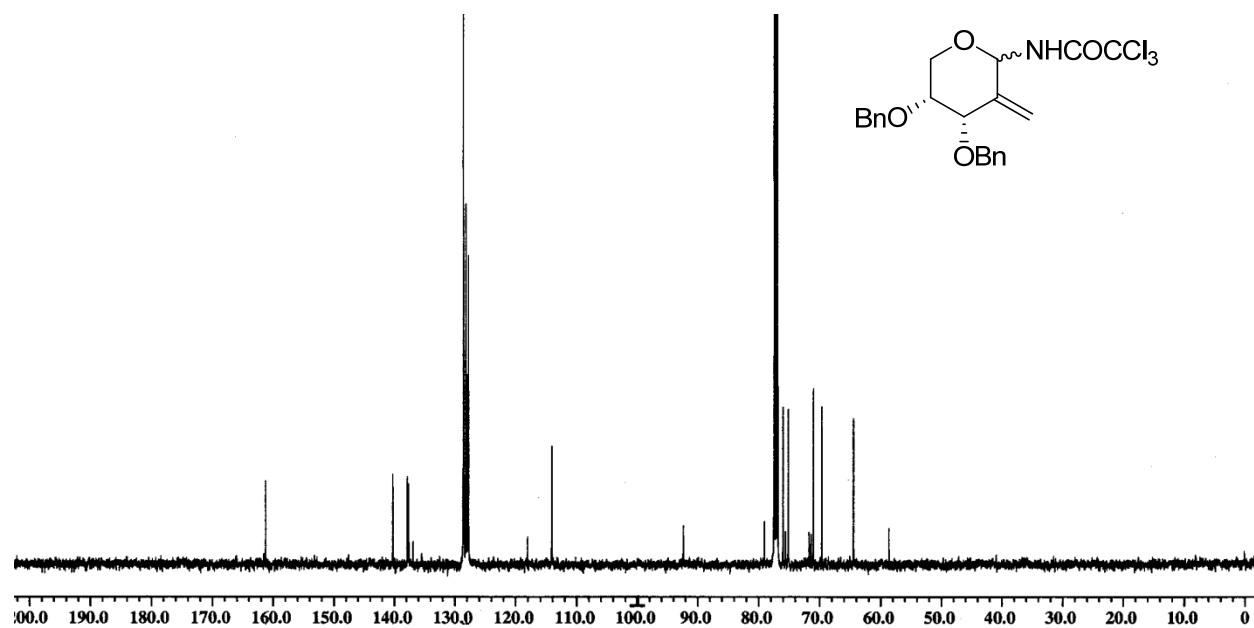

**Figure 6:** <sup>13</sup>C NMR (125 MHz) Spectrum of Compound 21a/b

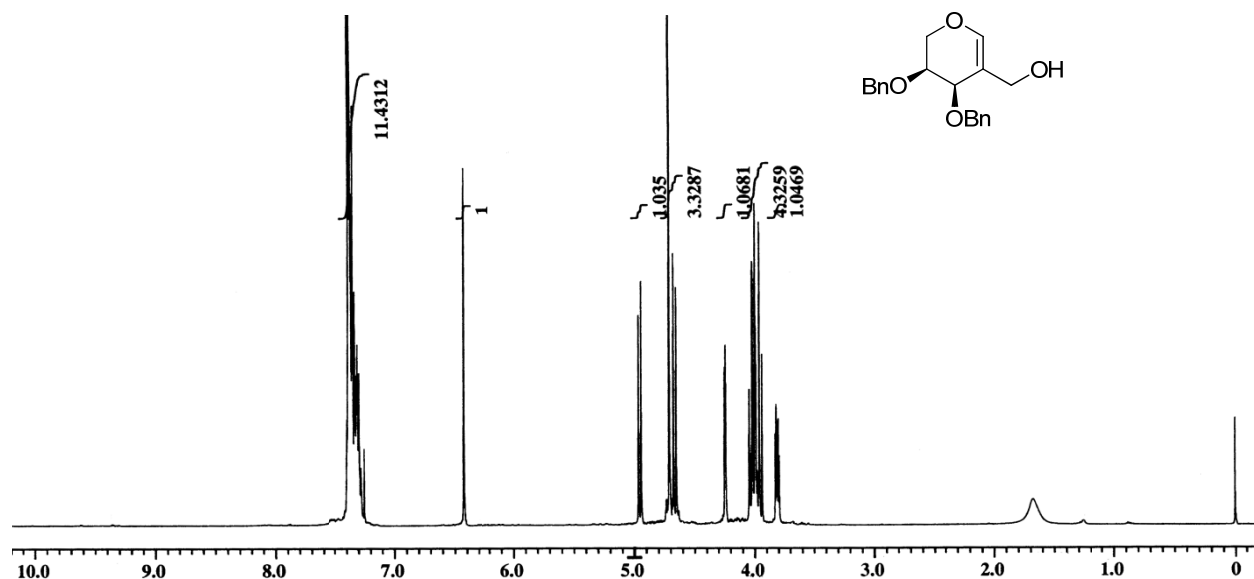

**Figure 7:**  $^1\text{H}$  NMR (500 MHz) Spectrum of Compound 24

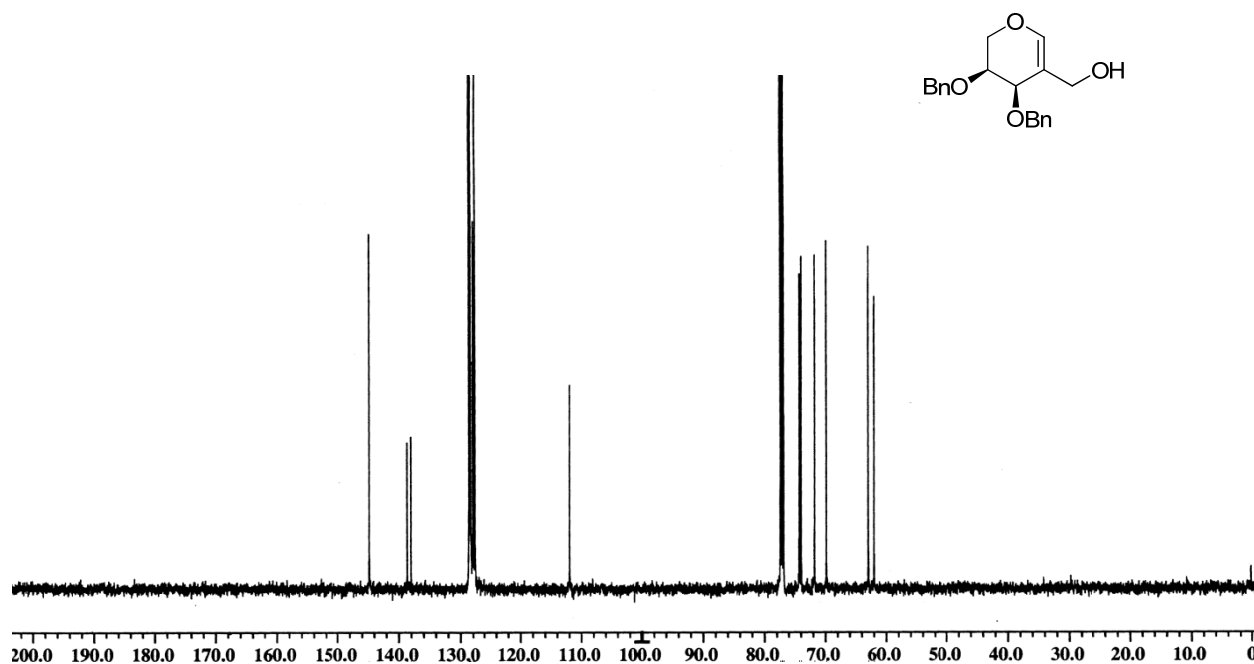

**Figure 8:**  $^{13}\text{C}$  NMR (125 MHz) Spectrum of Compound 24

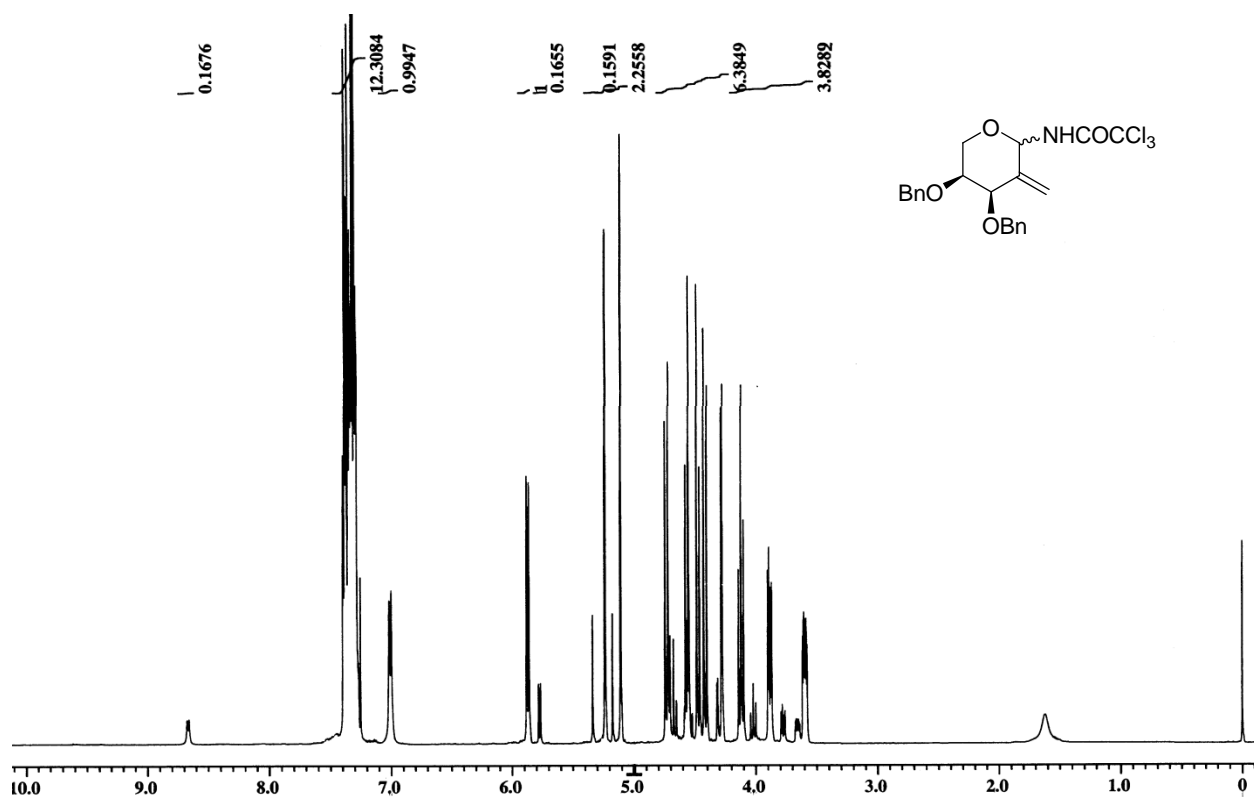

**Figure 9:** <sup>1</sup>H NMR (500 MHz) Spectrum of Compound 25a/b

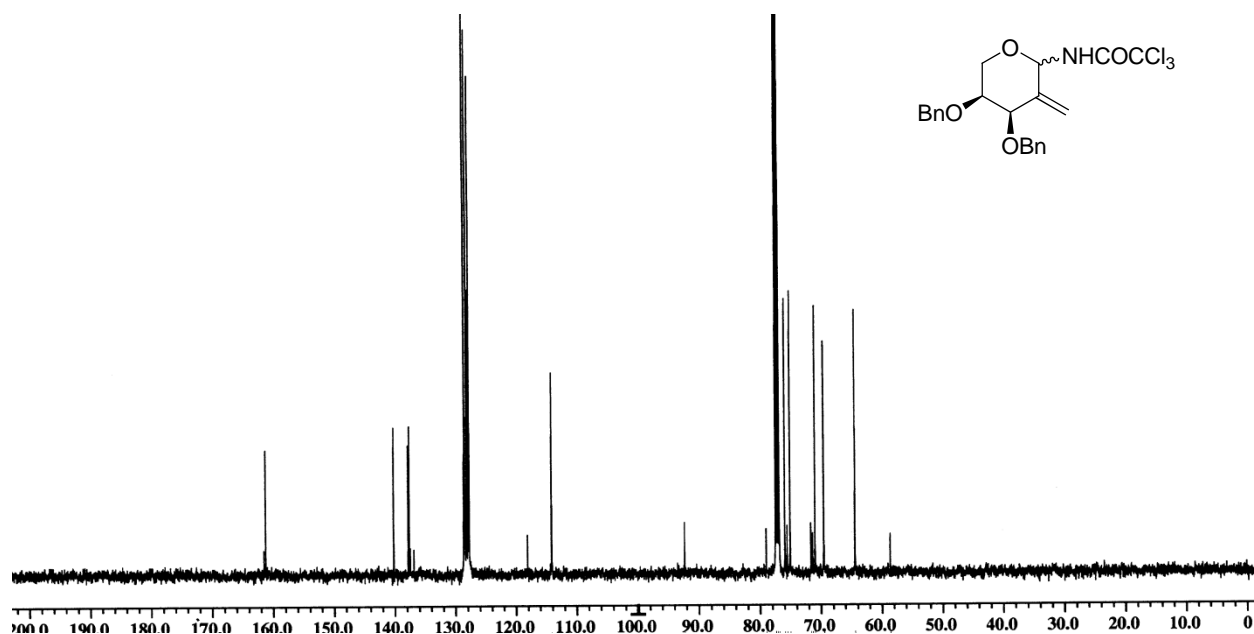

**Figure 10:** <sup>13</sup>C NMR (125 MHz) Spectrum of Compound 25a/b

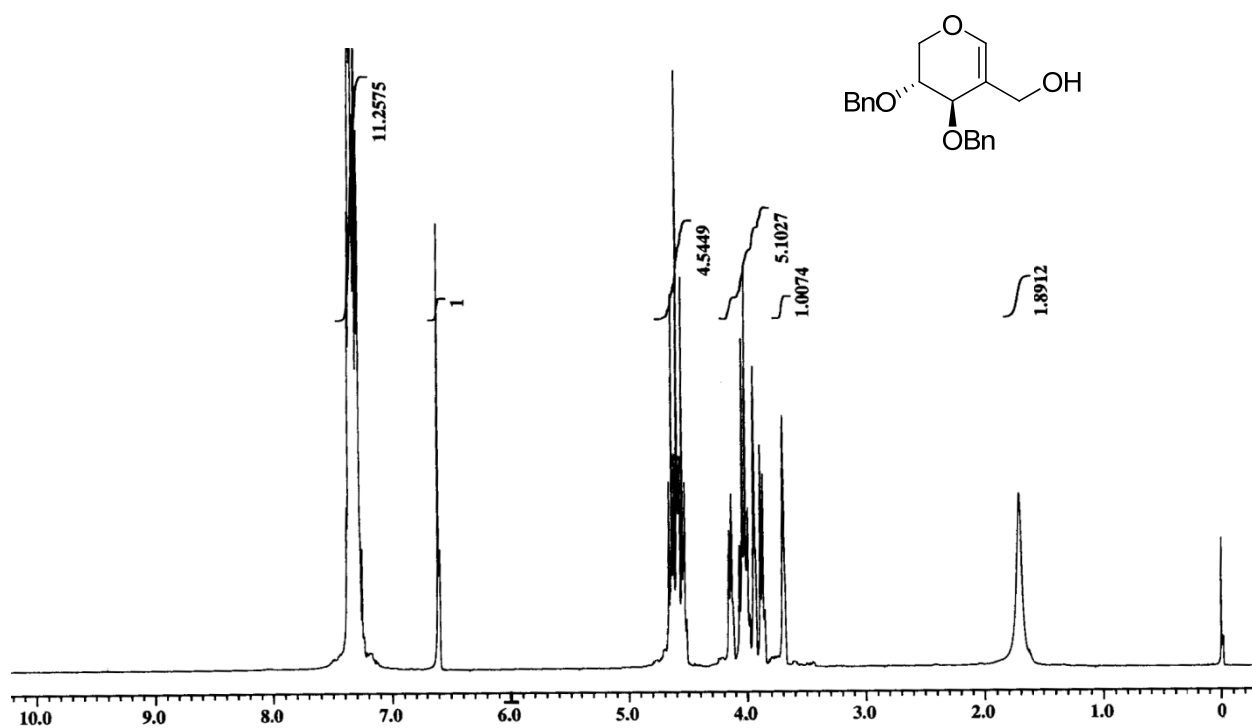

**Figure 11:** <sup>1</sup>H NMR (500 MHz) Spectrum of Compound 28

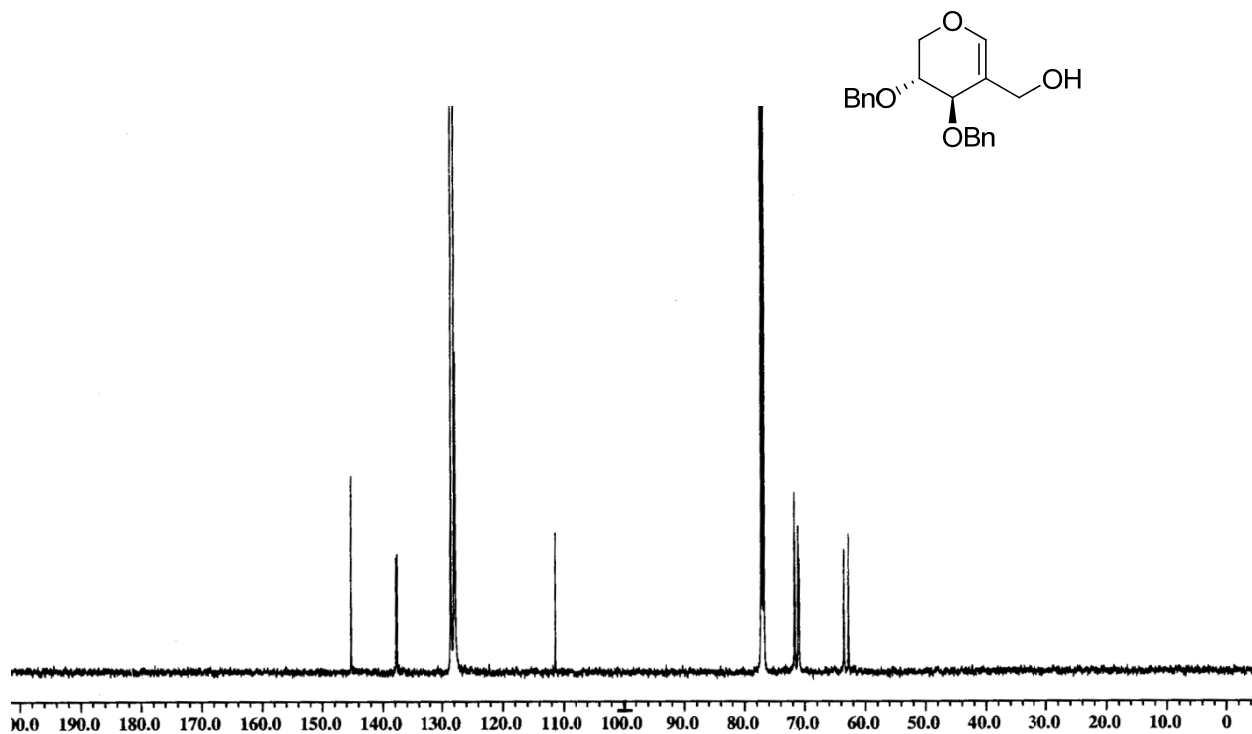

**Figure 12:** <sup>13</sup>C NMR (125 MHz) Spectrum of Compound 28

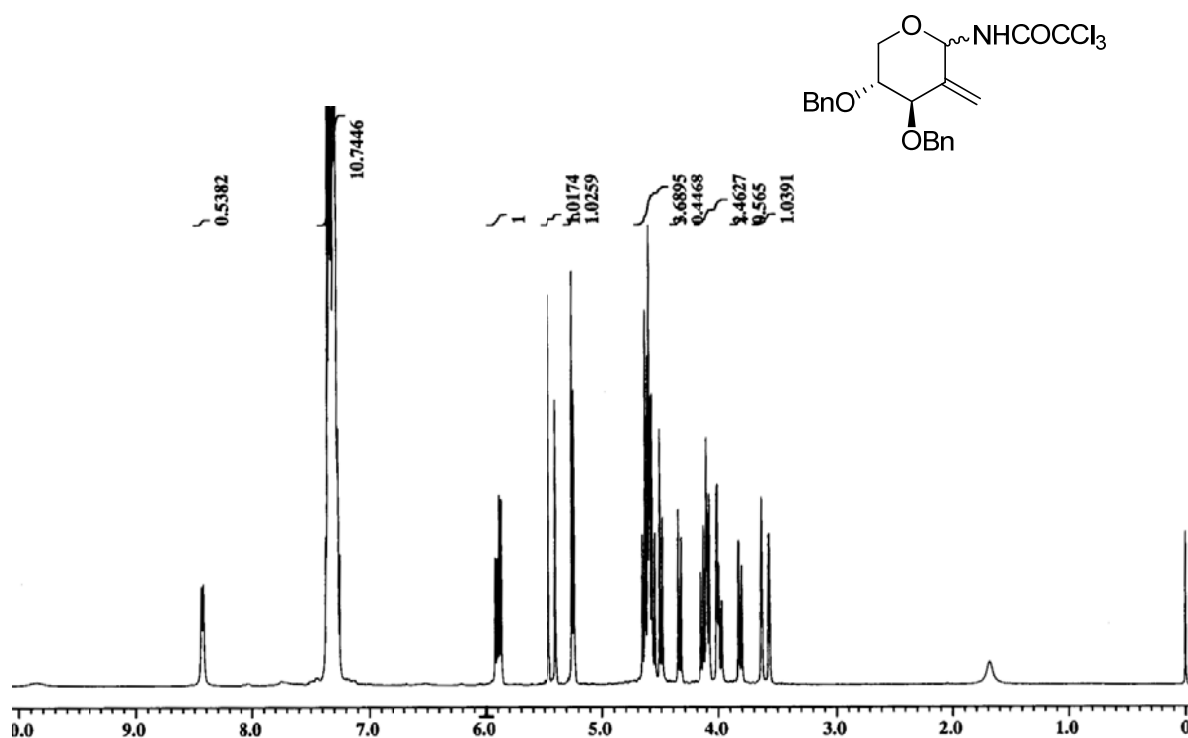

Figure 13: <sup>1</sup>H NMR (500 MHz) Spectrum of Compound 29a/b

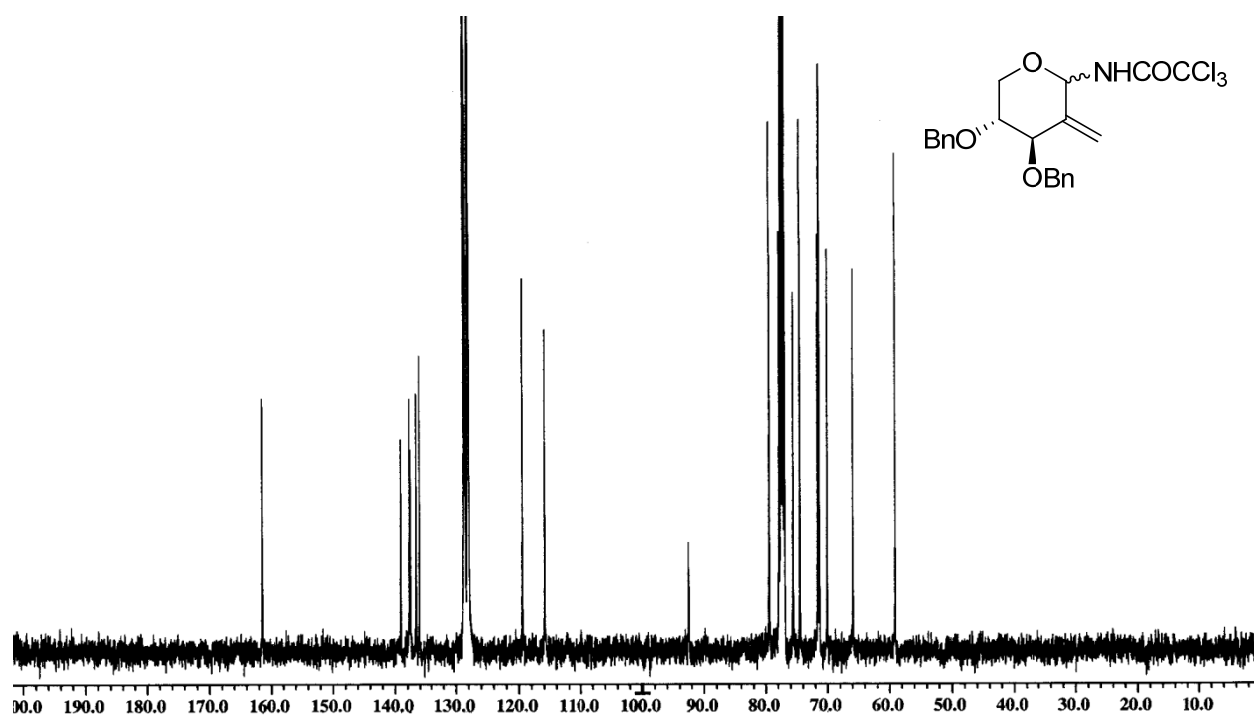

Figure 14: <sup>13</sup>C NMR (125 MHz) Spectrum of Compound 29a/b



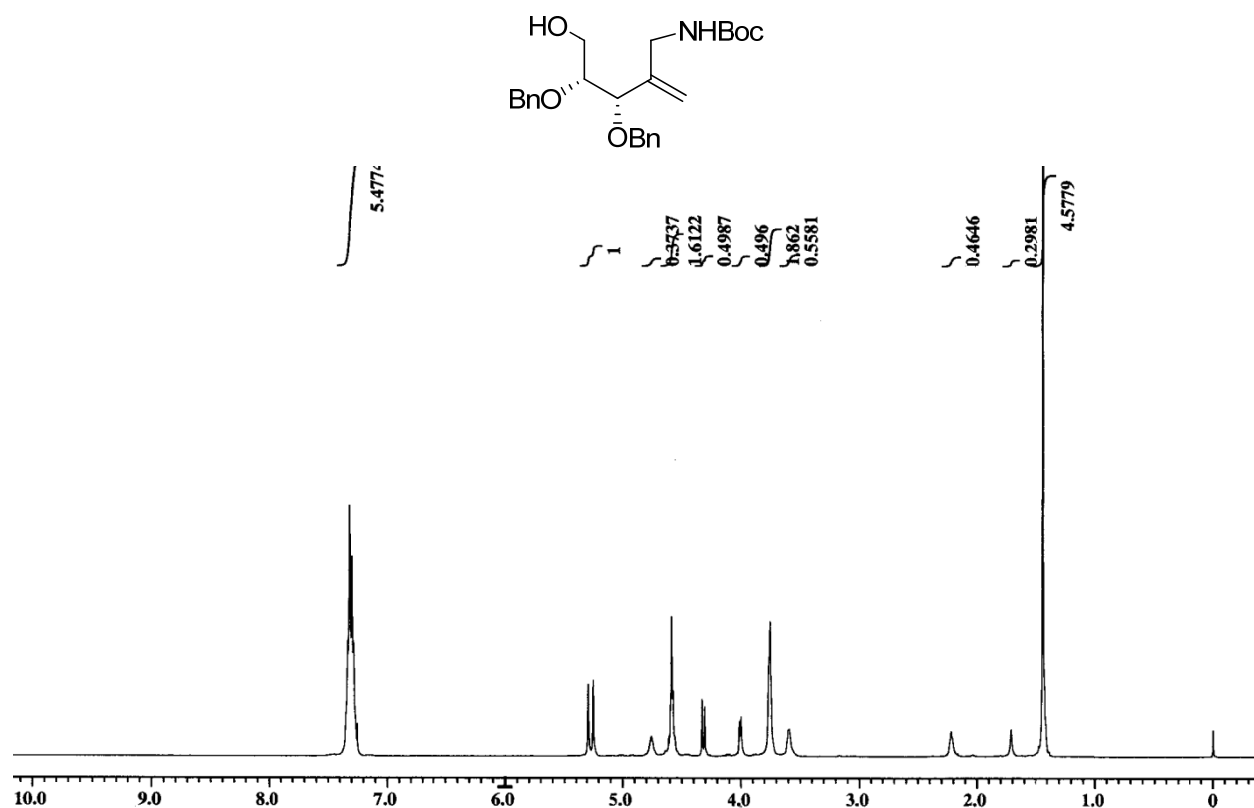

Figure 15: <sup>1</sup>H NMR (500 MHz) Spectrum of Compound 30

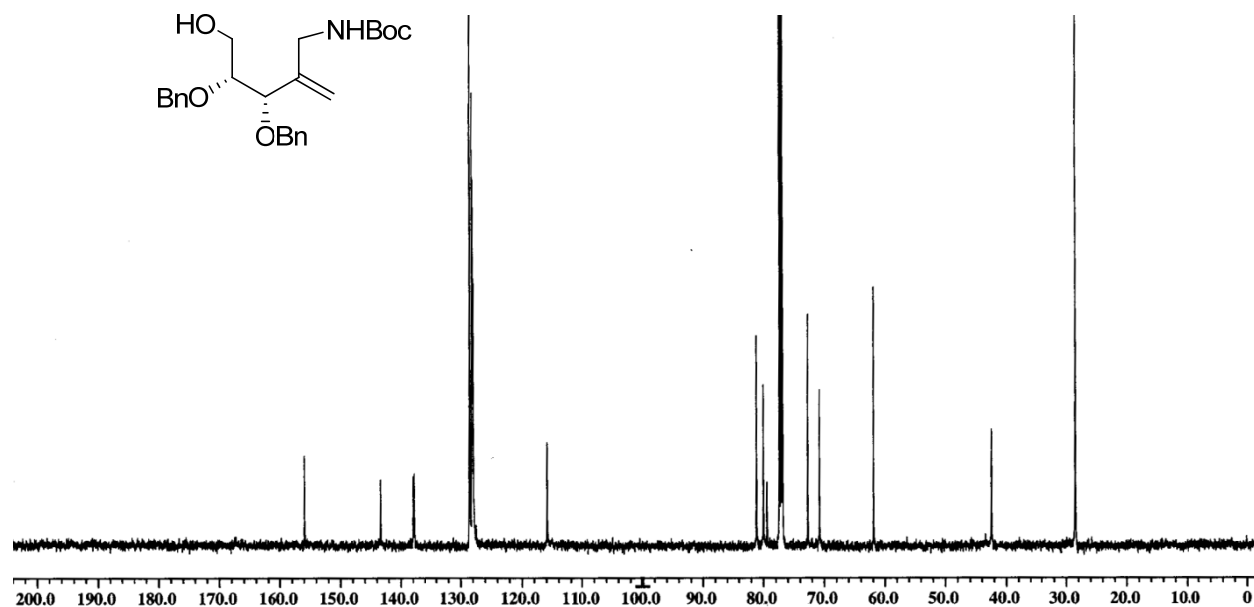

Figure 16: <sup>13</sup>C NMR (125 MHz) Spectrum of Compound 30

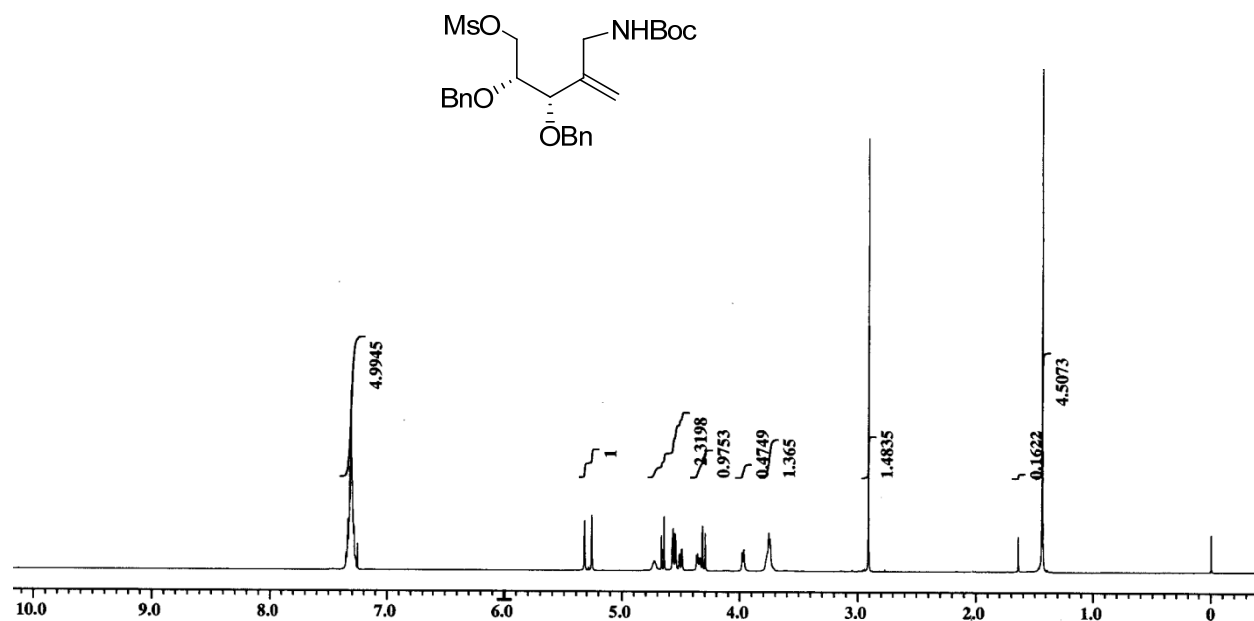

Figure 17: <sup>1</sup>H NMR (500 MHz) Spectrum of Compound 31

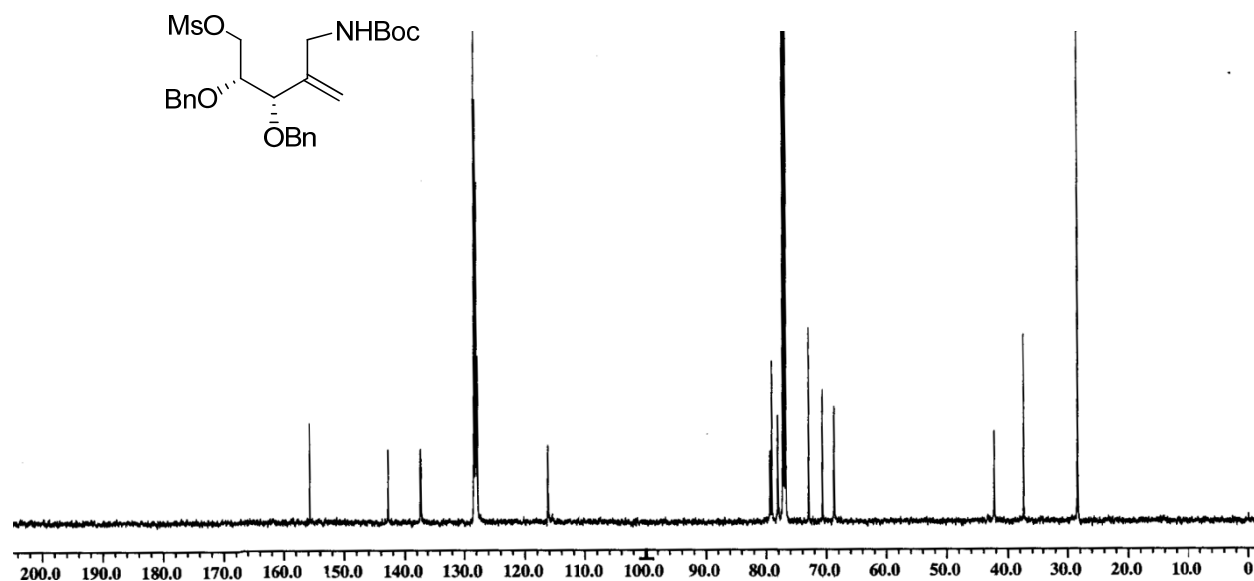

Figure 18: <sup>13</sup>C NMR (125 MHz) Spectrum of Compound 31

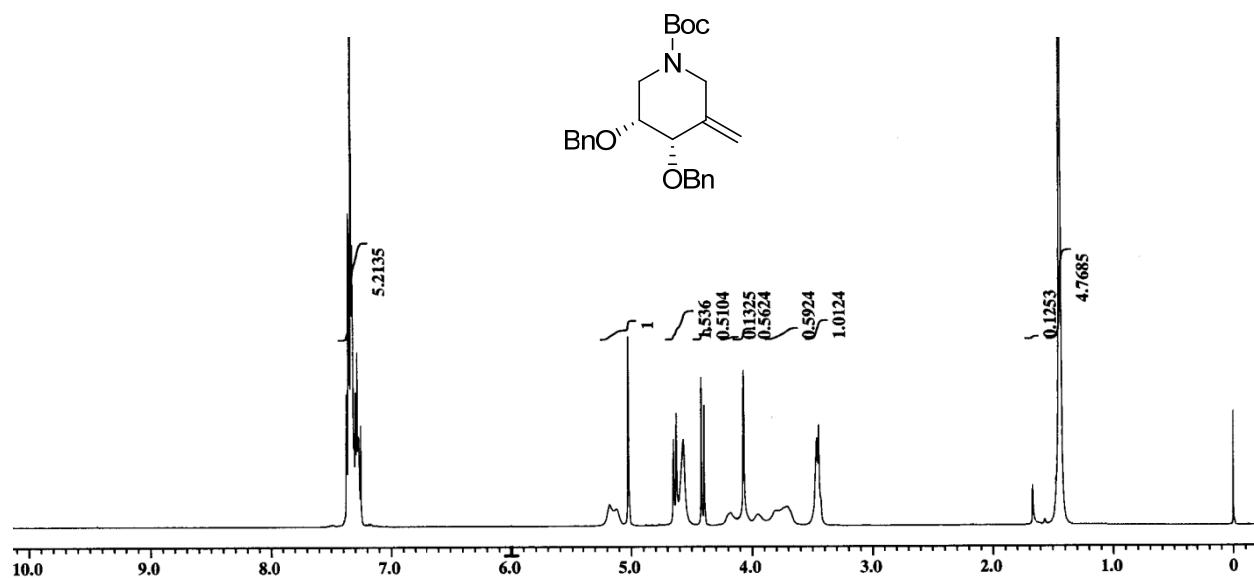

**Figure 19:** <sup>1</sup>H NMR (500 MHz) Spectrum of Compound 32

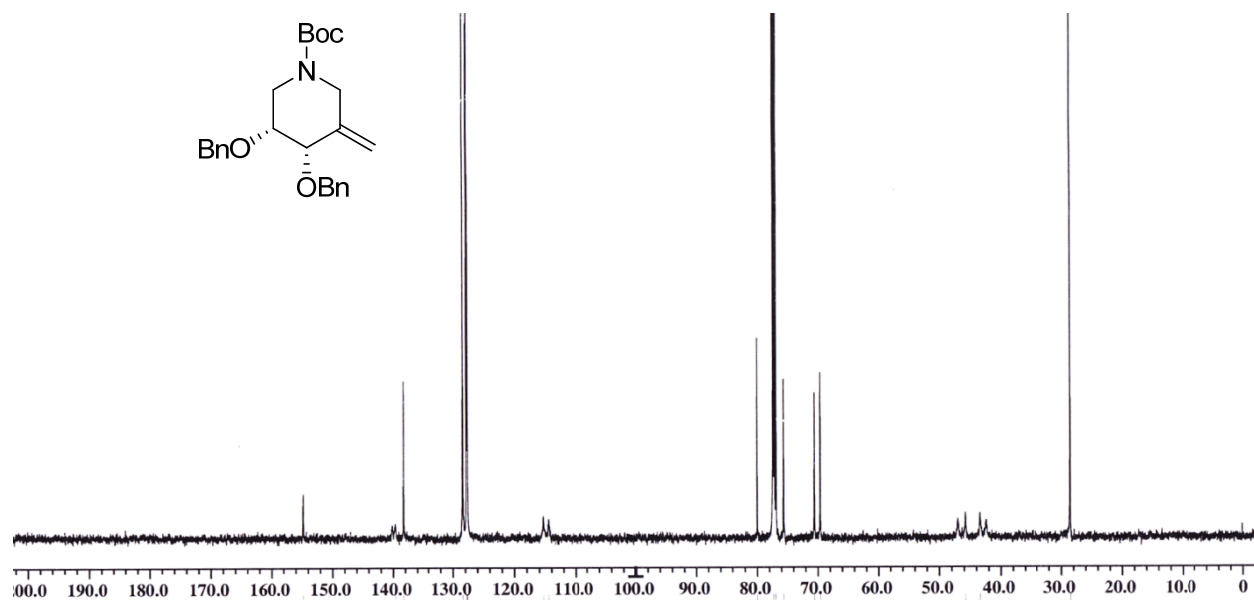

**Figure 20:** <sup>13</sup>C NMR (125 MHz) Spectrum of Compound 32

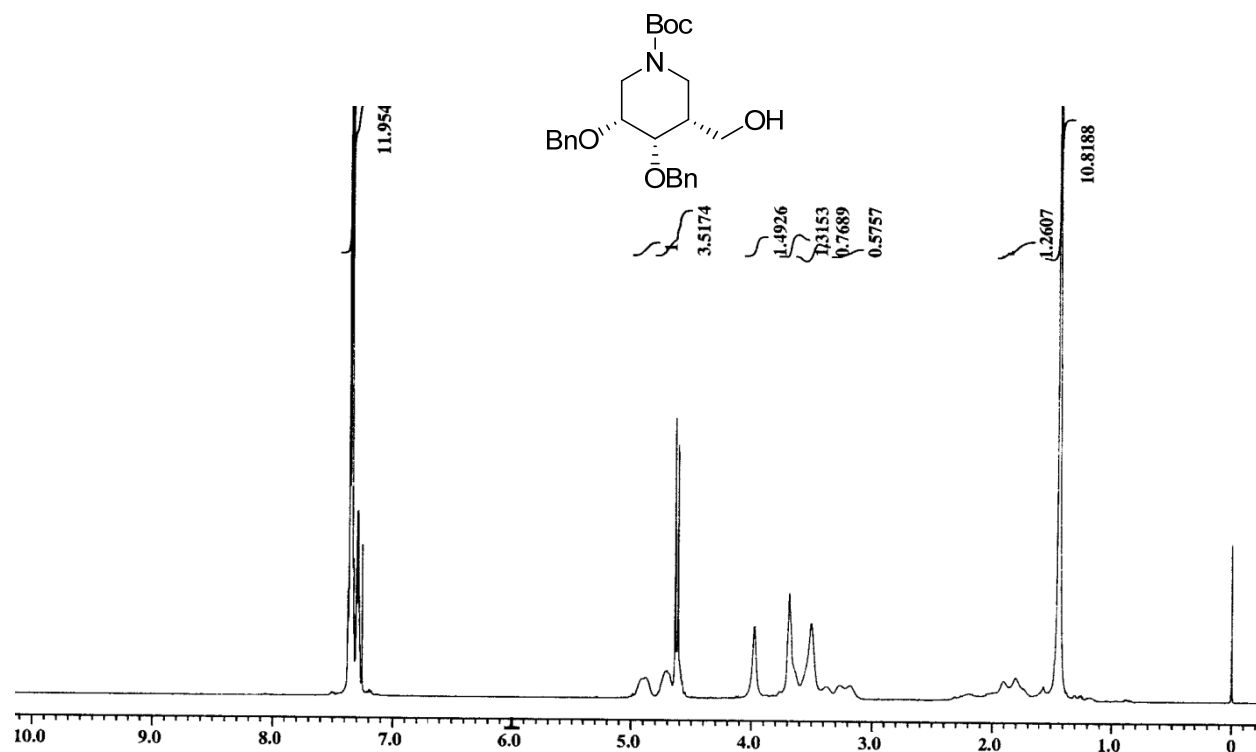

**Figure 21:**  $^1\text{H}$  NMR (500 MHz) Spectrum of Compound 33

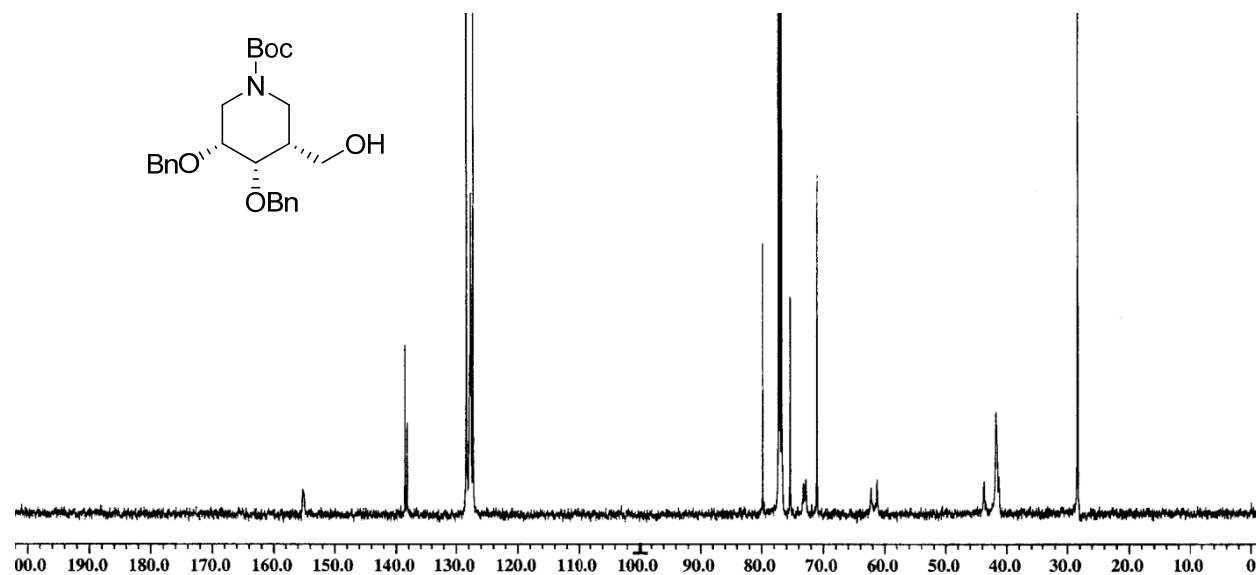

**Figure 22:**  $^{13}\text{C}$  NMR (125 MHz) Spectrum of Compound 33

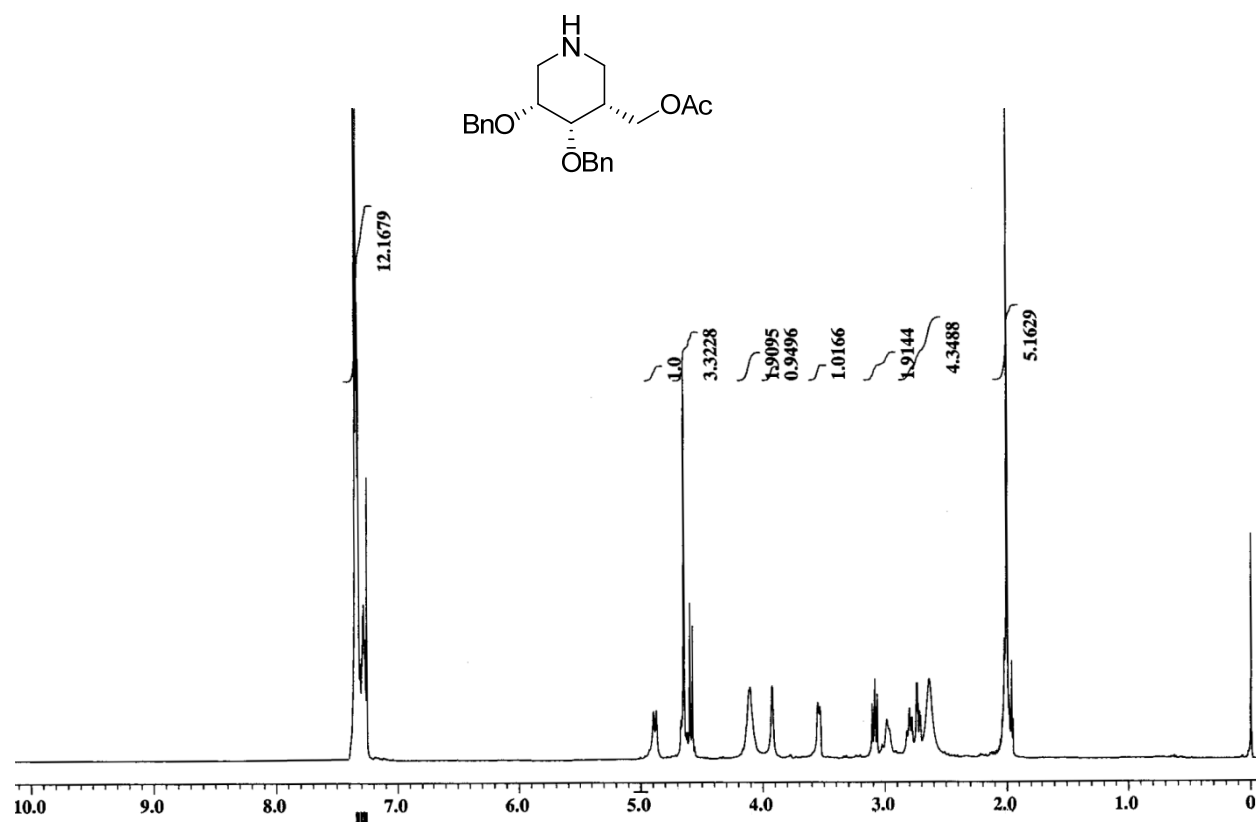

**Figure 23:** <sup>1</sup>H NMR (500 MHz) Spectrum of Compound 34

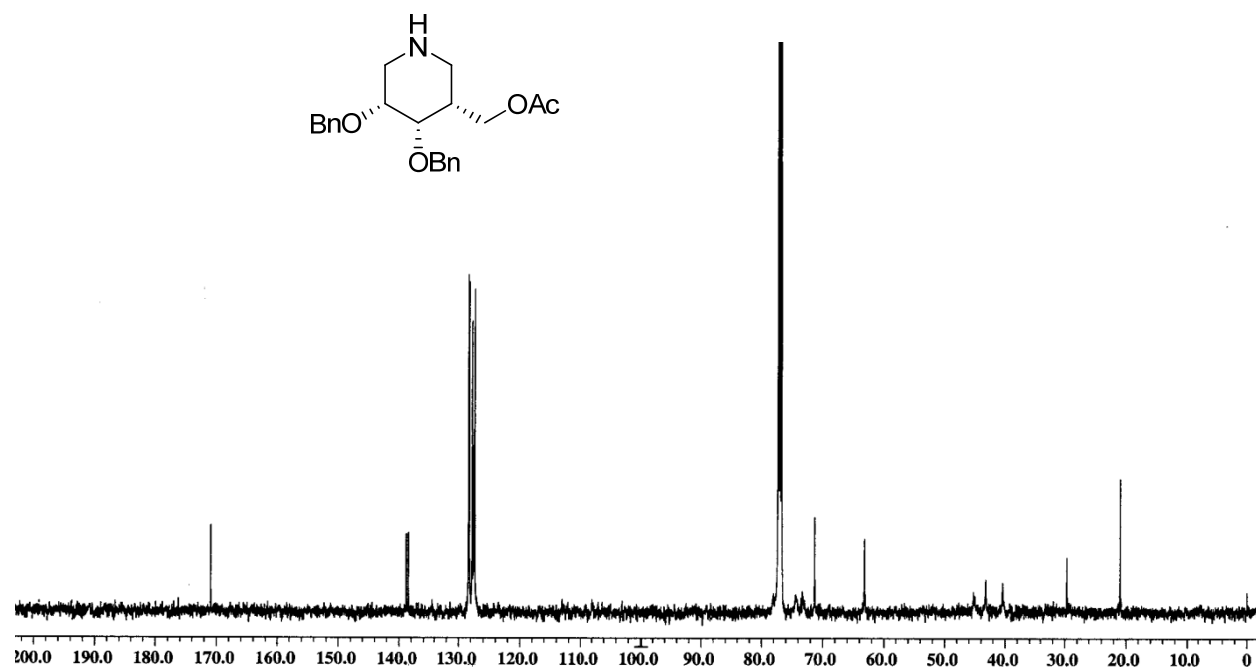

**Figure 24:** <sup>13</sup>C NMR (125 MHz) Spectrum of Compound 34

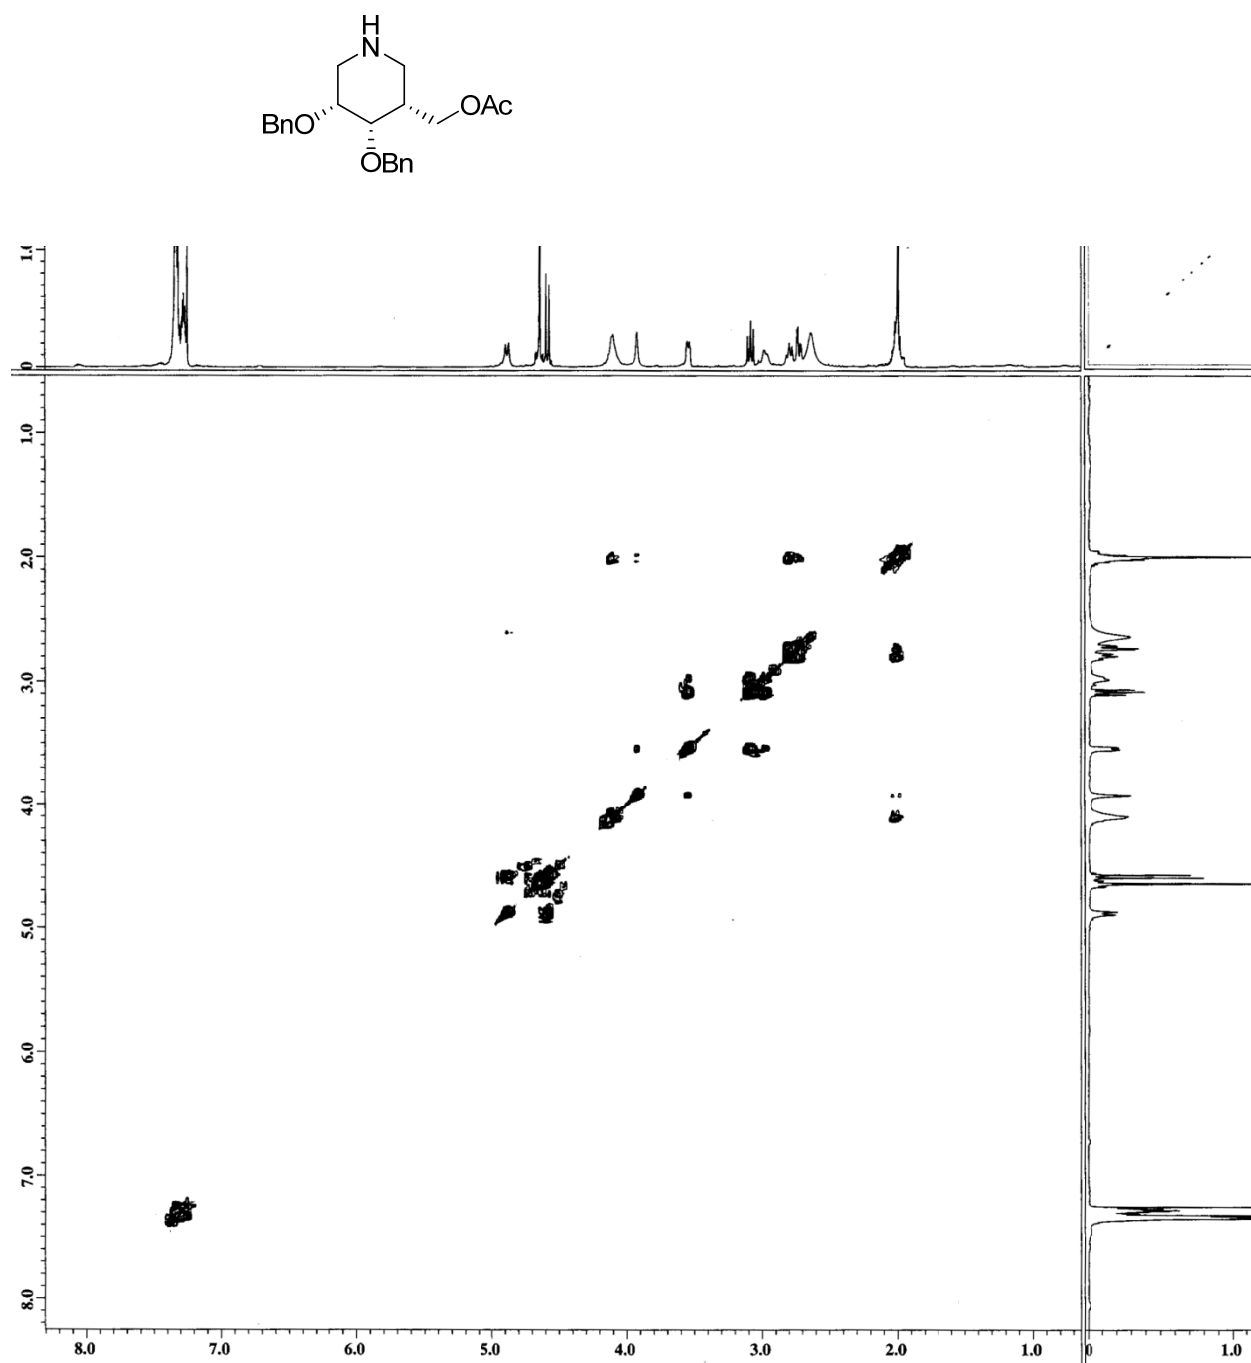

**Figure 25:**  $^1\text{H}$ - $^1\text{H}$  COSY (500 MHz) Spectrum of Compound **34**

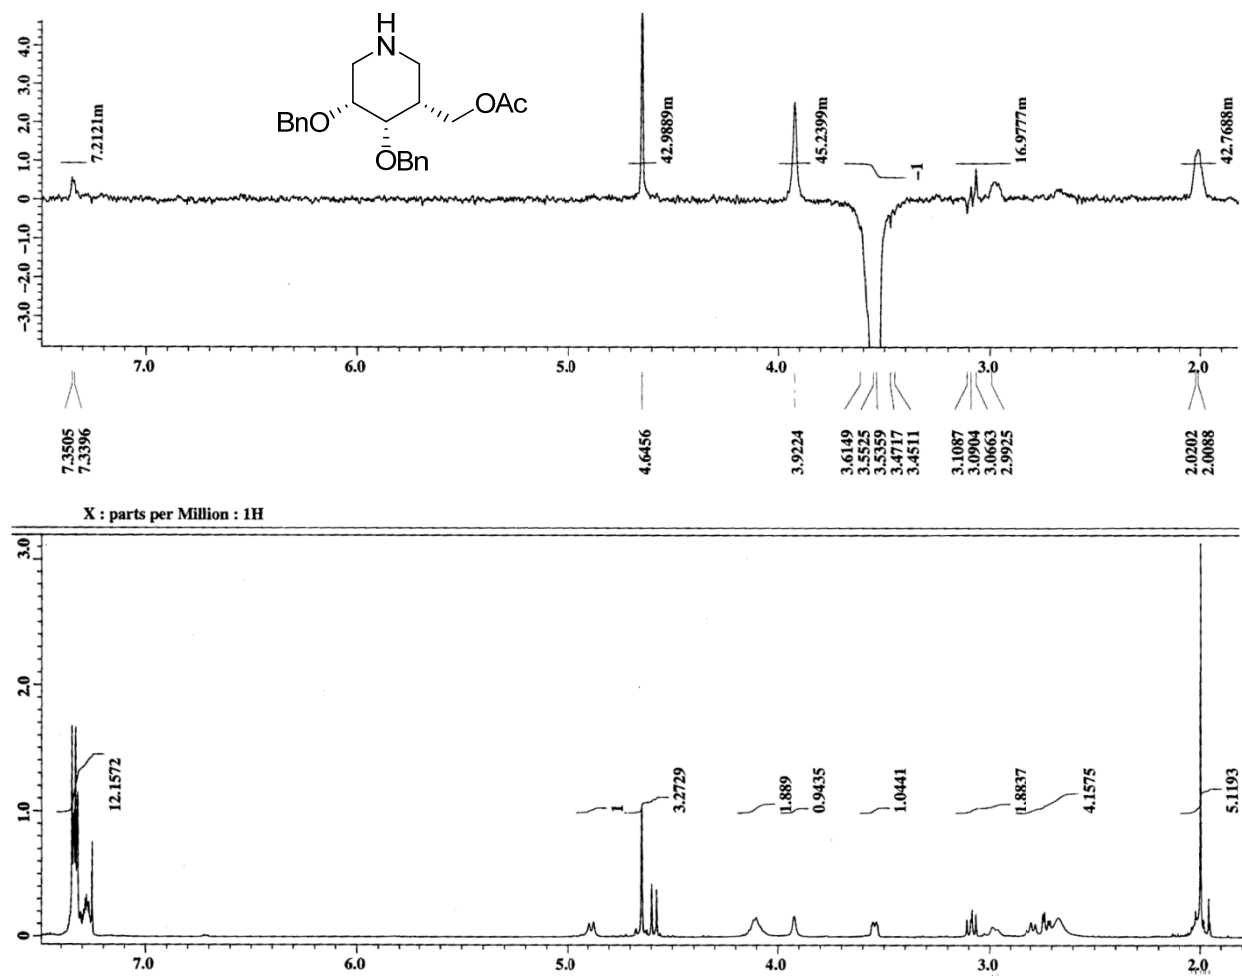

**Figure 26:**  $^1\text{H}$ - $^1\text{H}$  nOe (irradiation of H-5) Spectrum of Compound 34

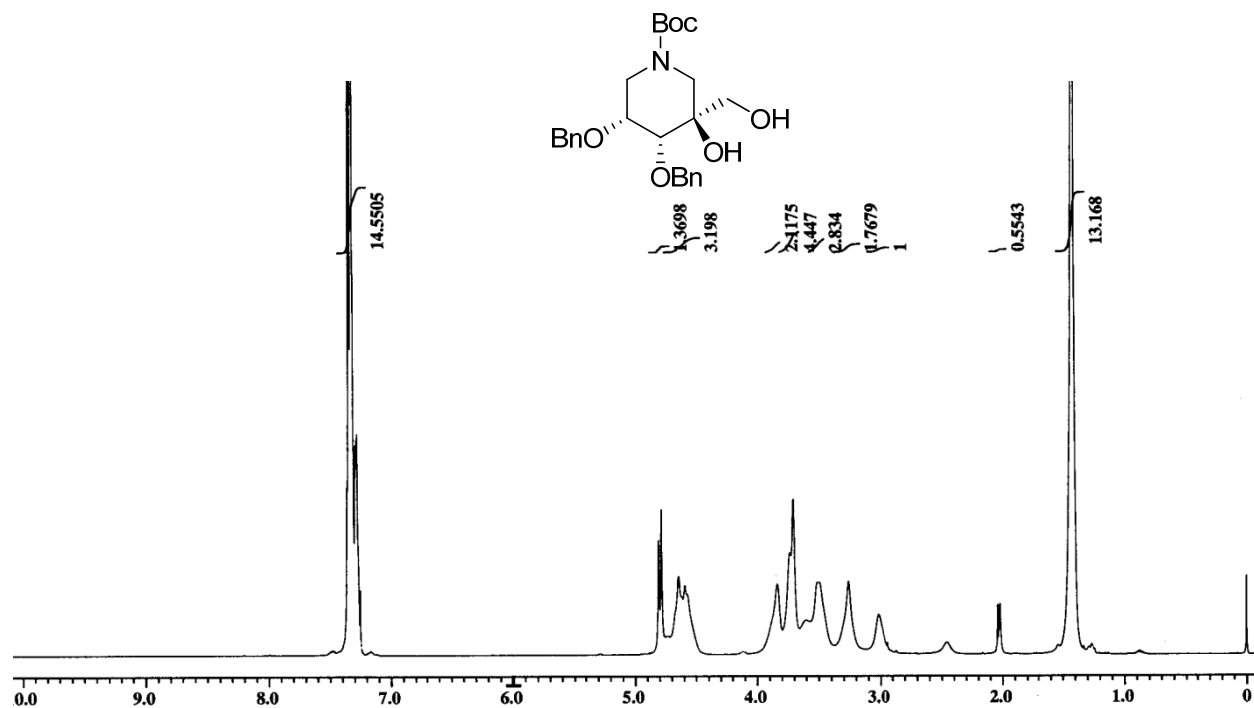

**Figure 27:** <sup>1</sup>H NMR (500 MHz) Spectrum of Compound 35

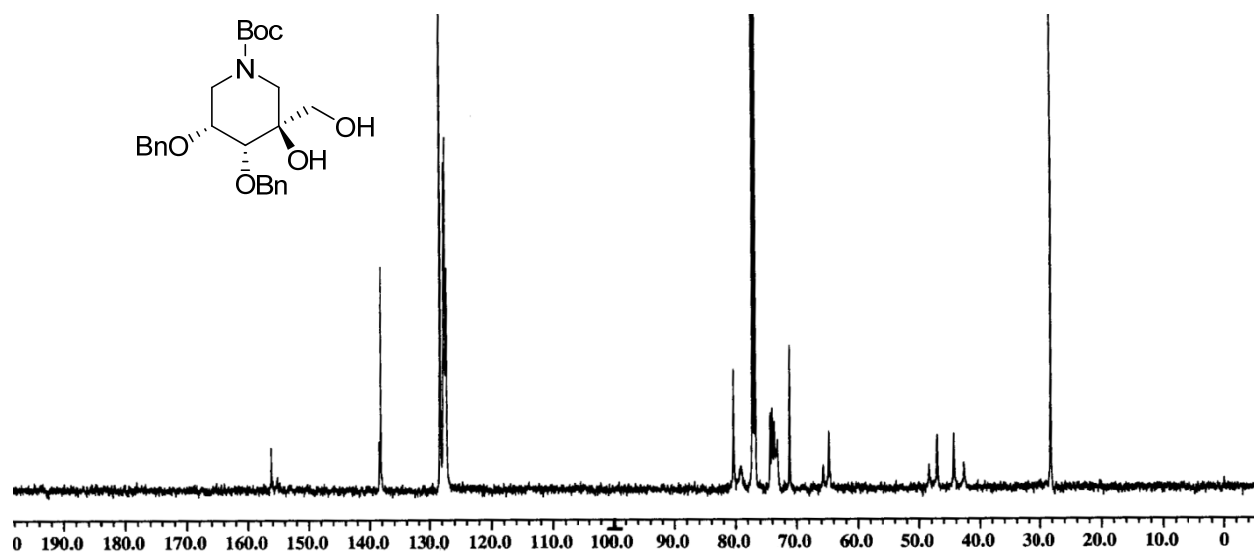

**Figure 28:** <sup>13</sup>C NMR (125 MHz) Spectrum of Compound 35



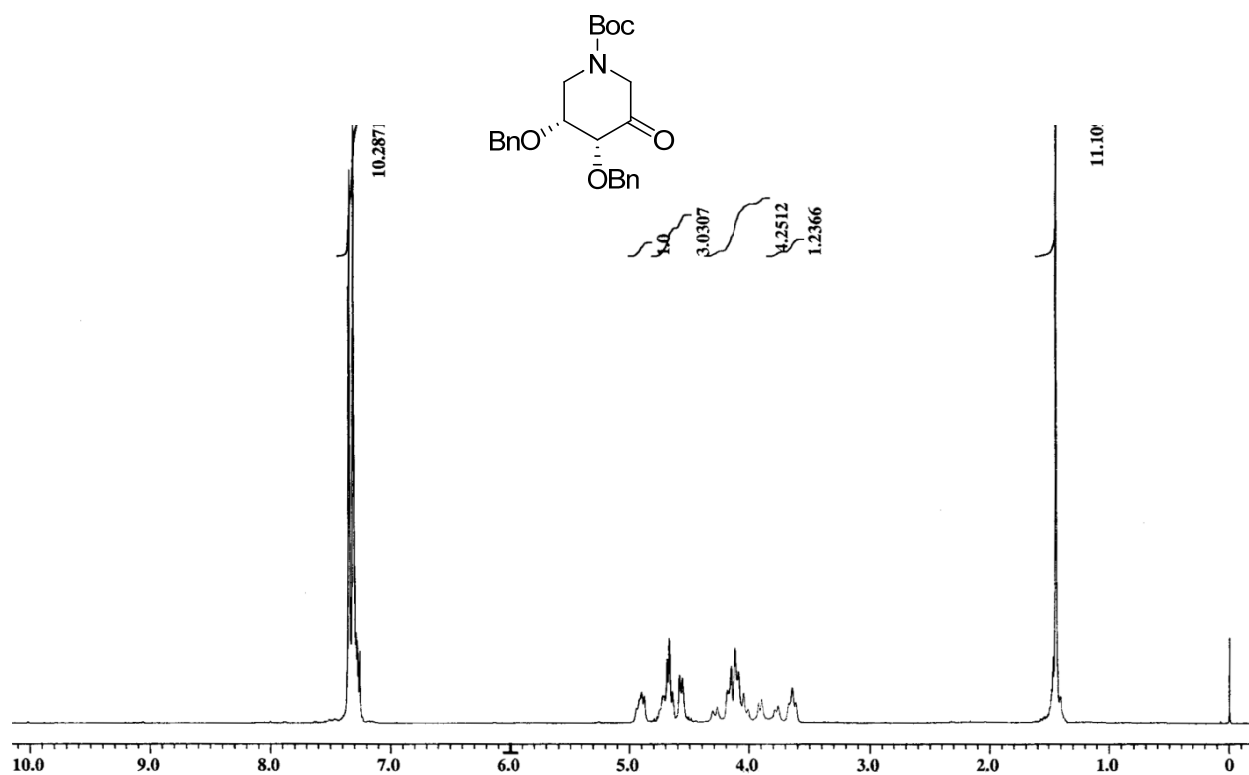

**Figure 29:** <sup>1</sup>H NMR (500 MHz) Spectrum of Compound 36

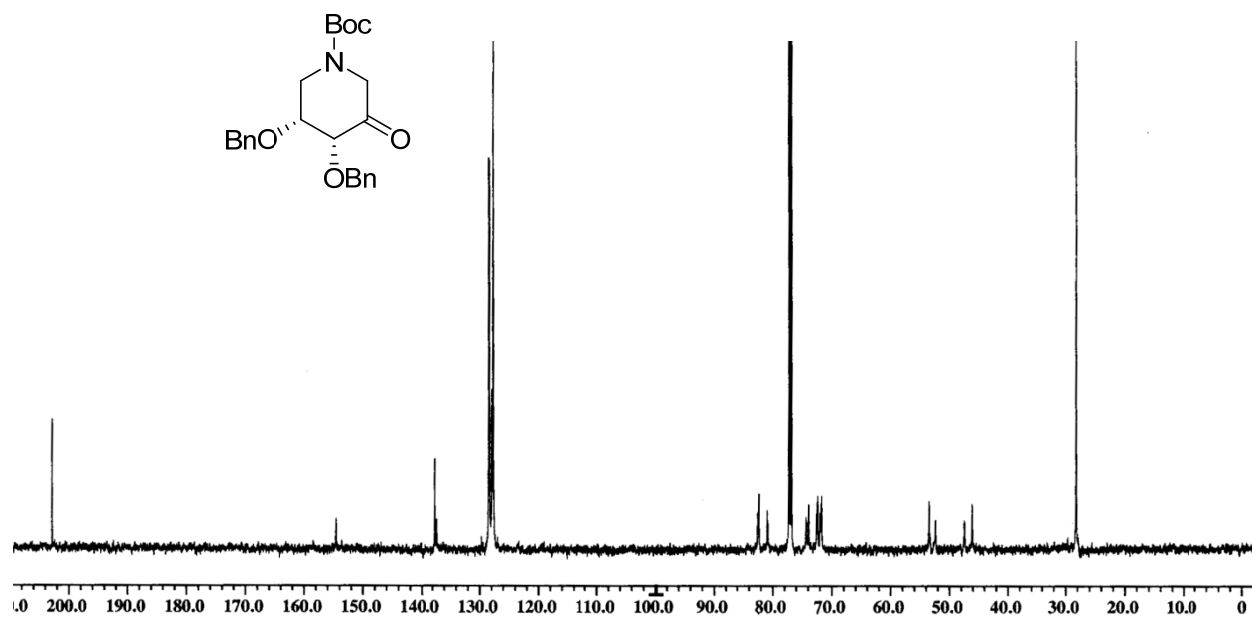

**Figure 30:** <sup>13</sup>C NMR (125 MHz) Spectrum of Compound 36

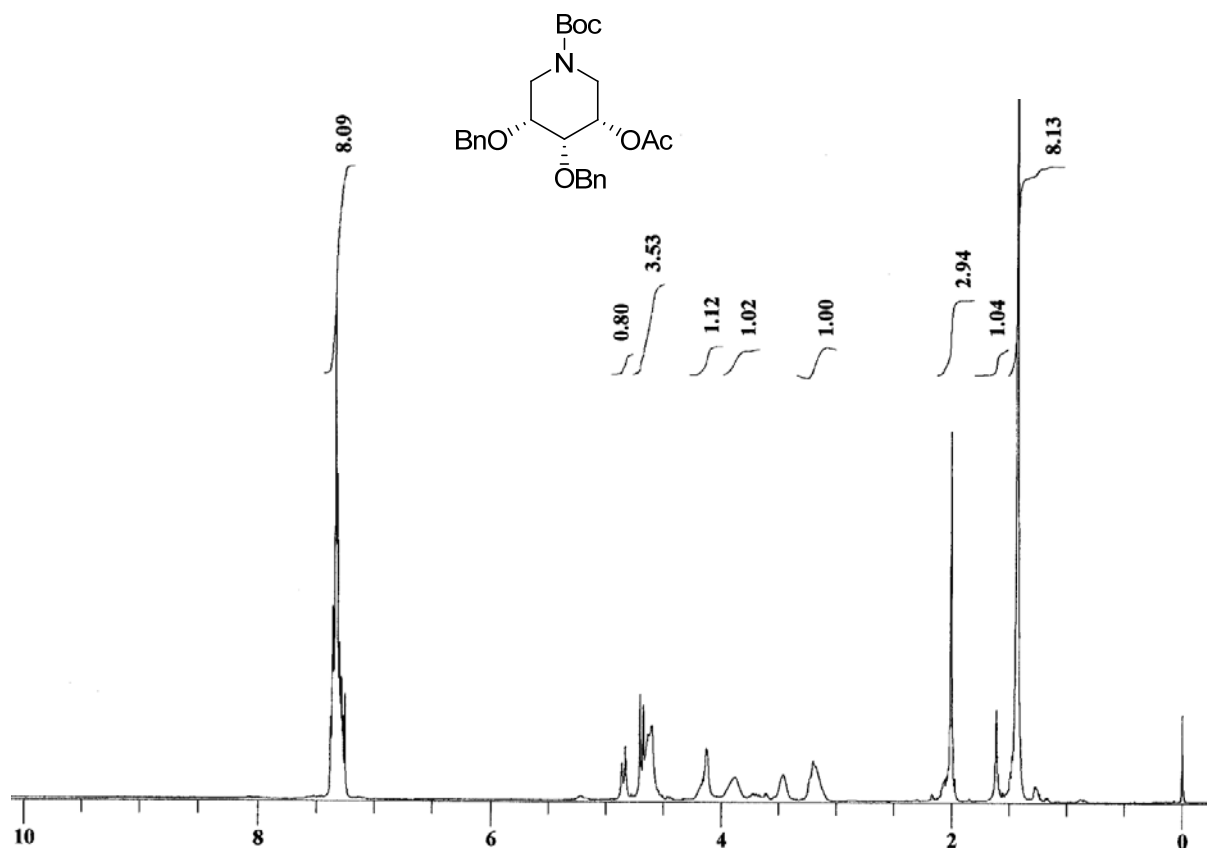

**Figure 31:** <sup>1</sup>H NMR (400 MHz) Spectrum of Compound 37

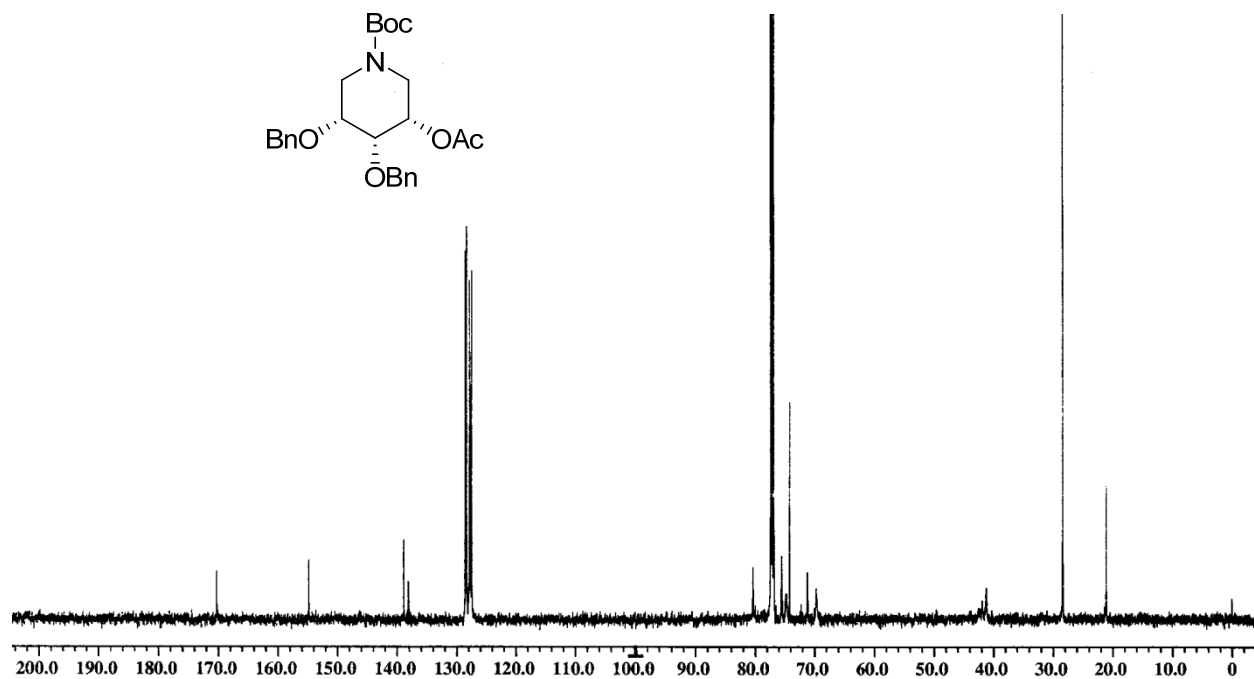

**Figure 32:** <sup>13</sup>C NMR (125 MHz) Spectrum of Compound 37

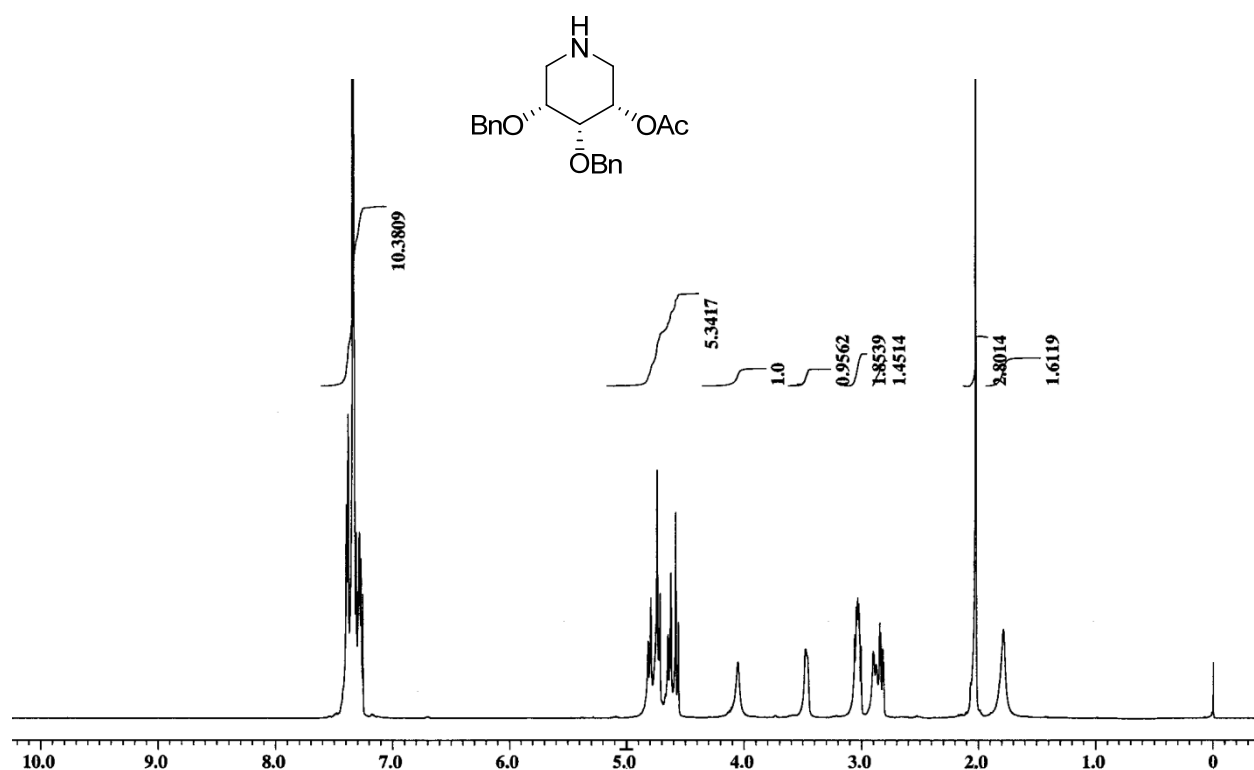

**Figure 33:** <sup>1</sup>H NMR (500 MHz) Spectrum of Compound 38

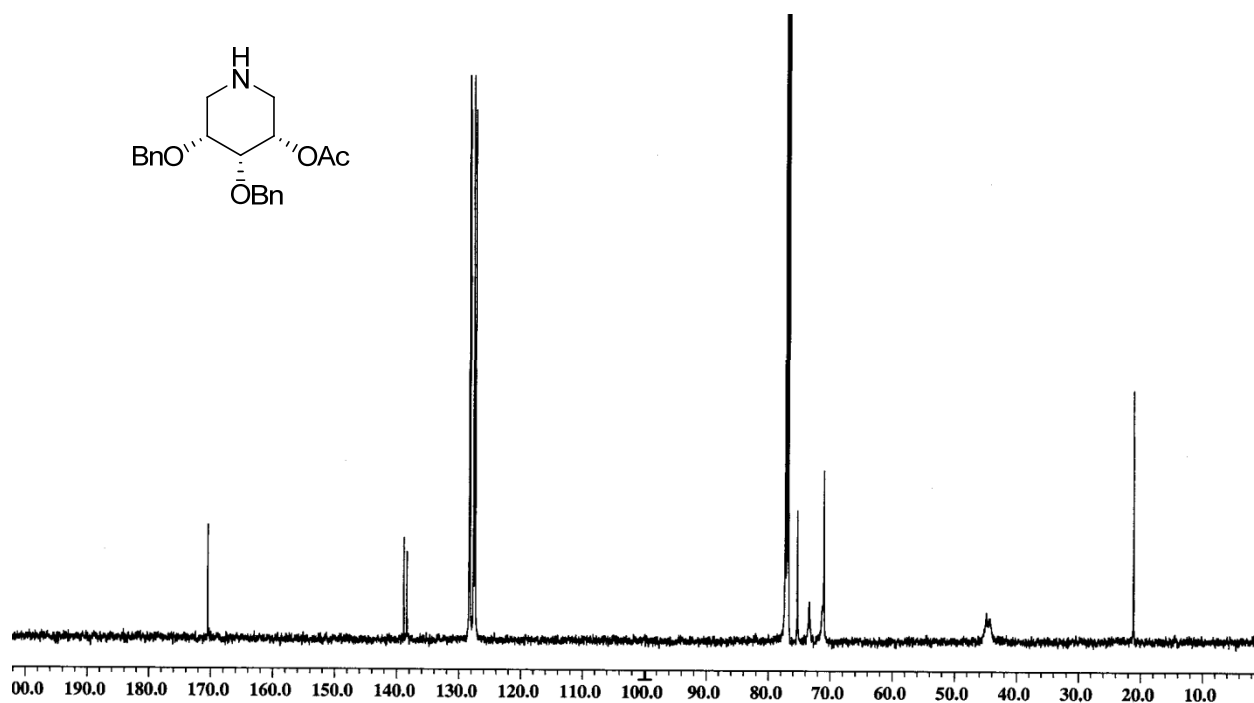

**Figure 34:** <sup>13</sup>C NMR (125 MHz) Spectrum of Compound 38

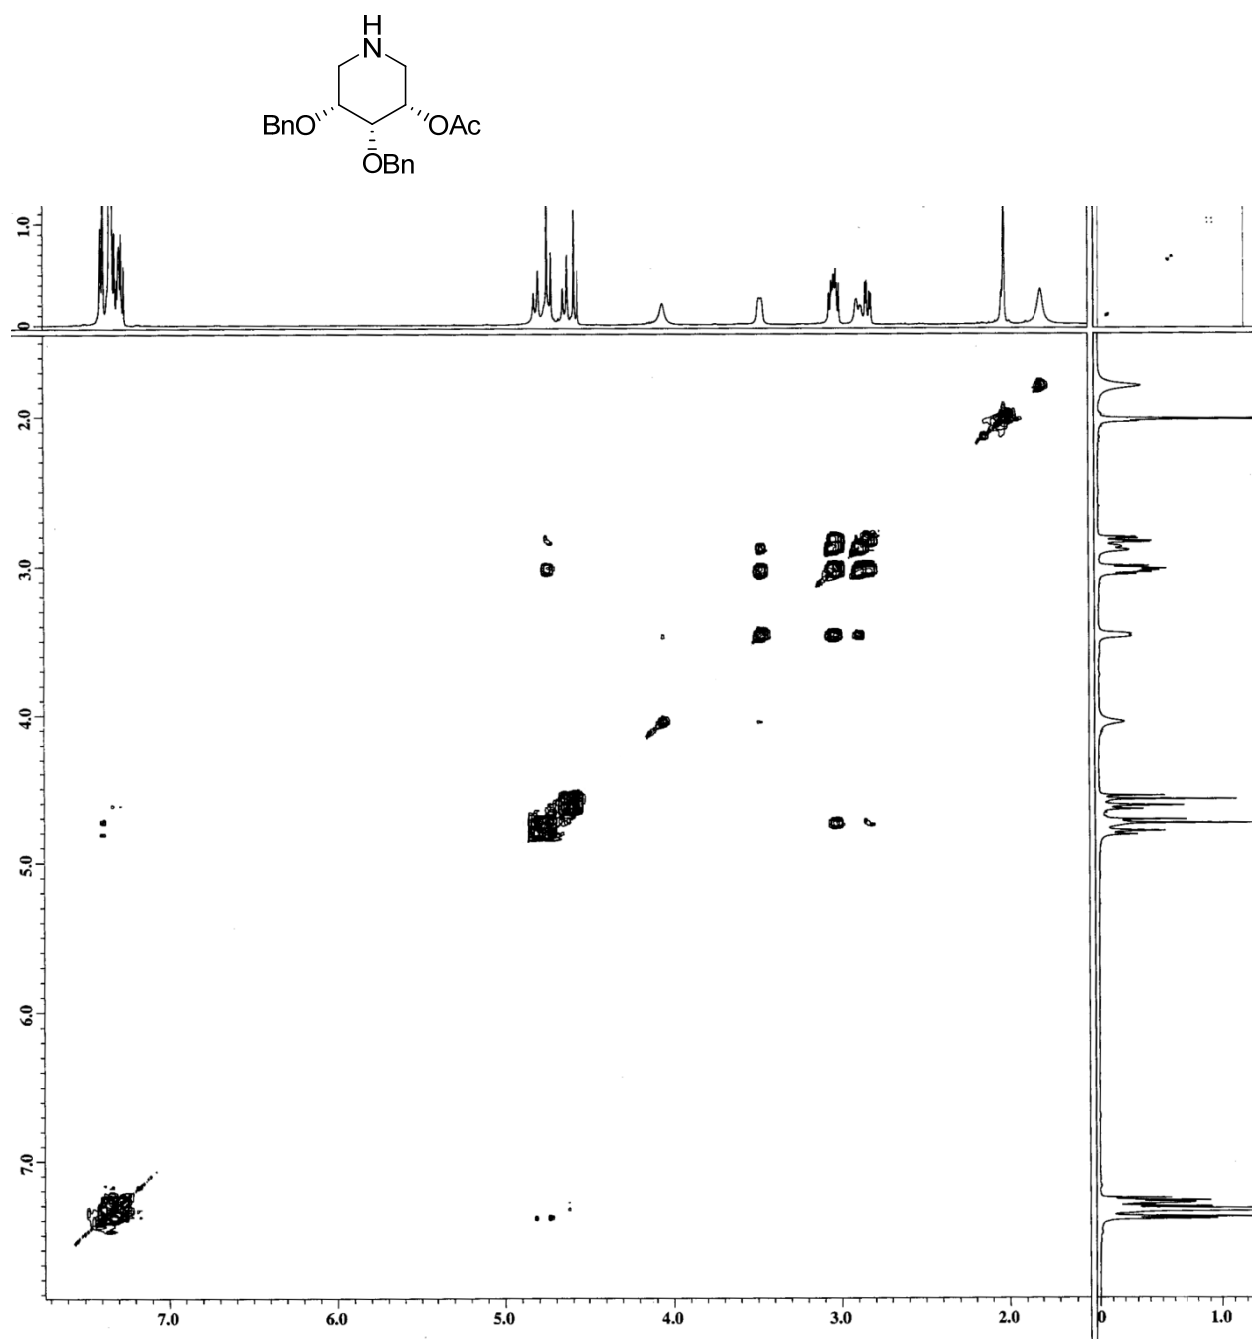

**Figure 35:**  $^1\text{H}$ - $^1\text{H}$  COSY (500 MHz) Spectrum of Compound **38**

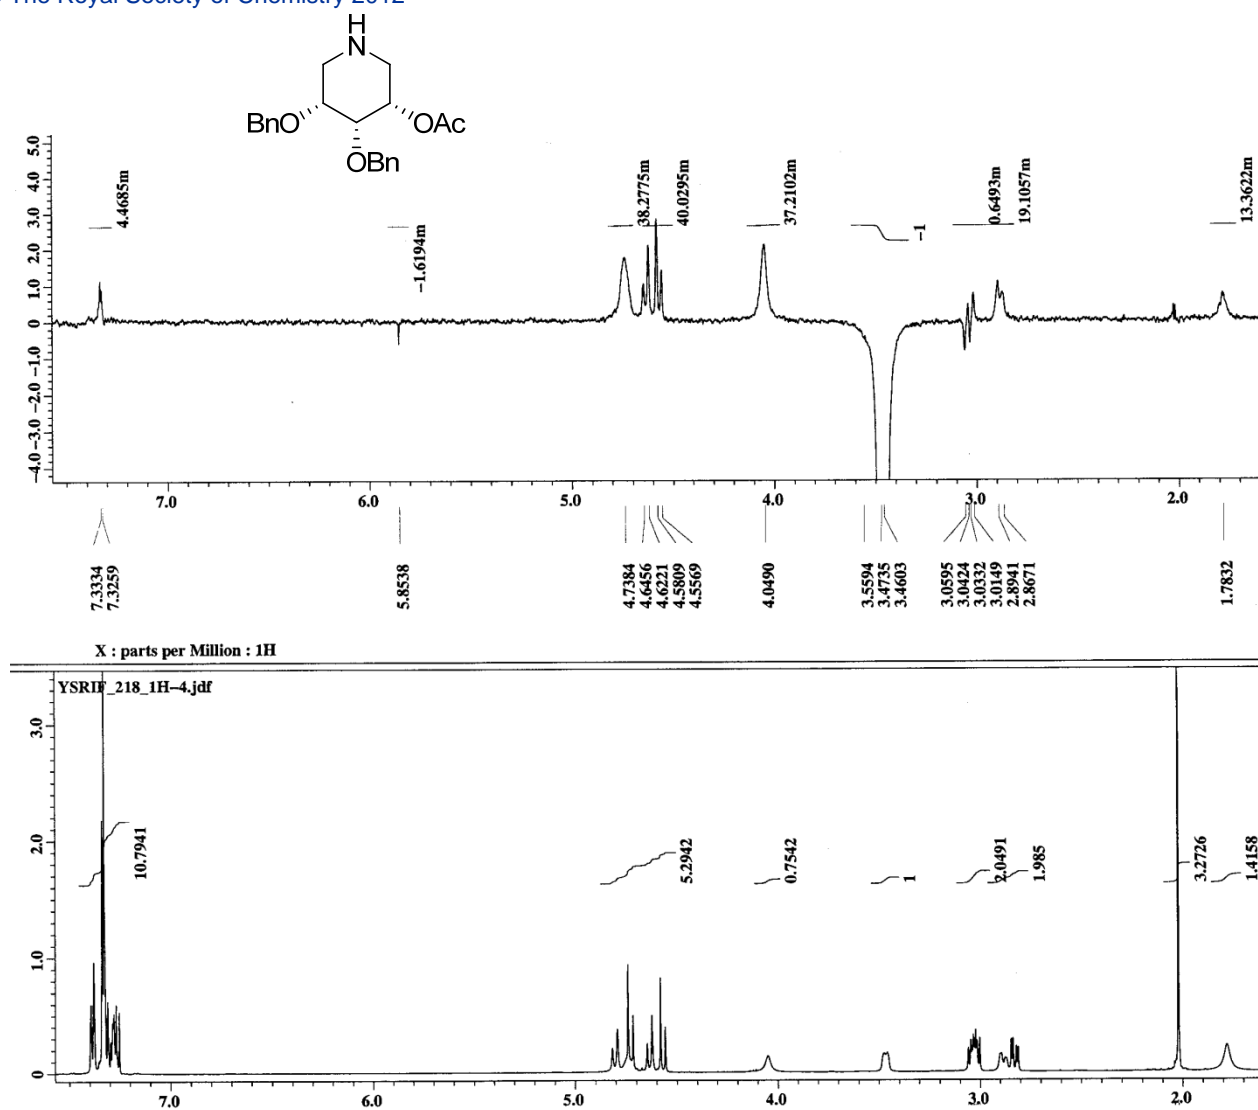

**Figure 36:**  $^1\text{H}$ - $^1\text{H}$  nOe (irradiation of H-5) Spectrum of Compound 38

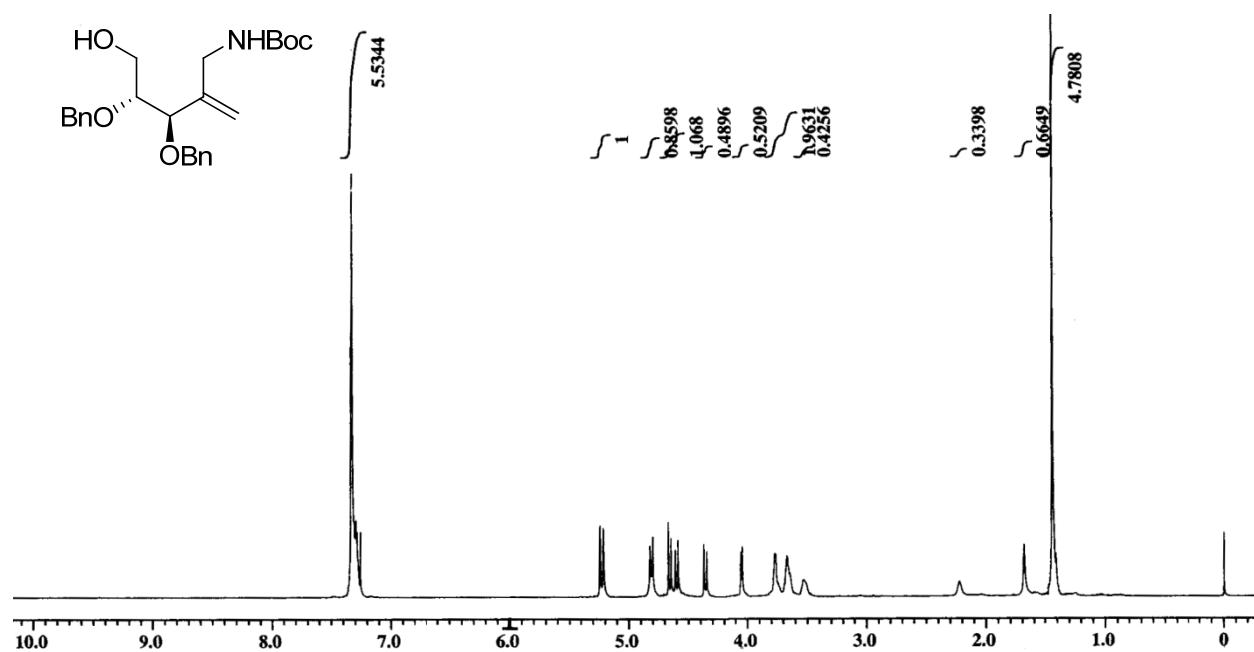

**Figure 37:** <sup>1</sup>H NMR (500 MHz) Spectrum of Compound 39

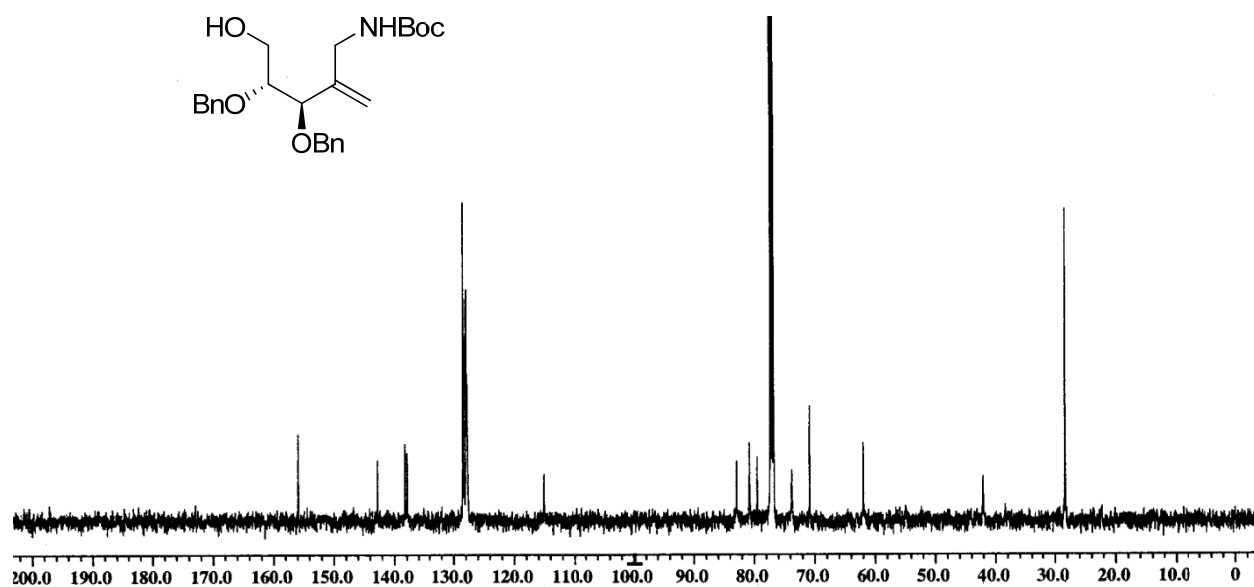

**Figure 38:** <sup>13</sup>C NMR (125 MHz) Spectrum of Compound 39

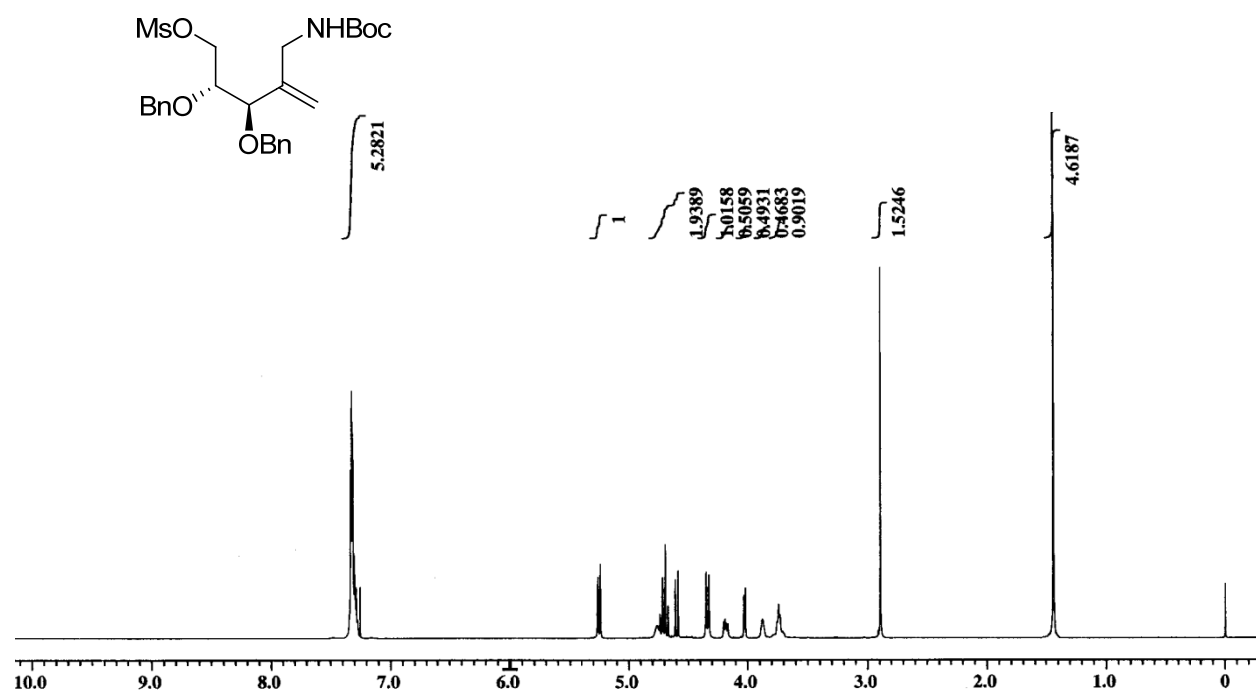

**Figure 39:** <sup>1</sup>H NMR (500 MHz) Spectrum of Compound 40

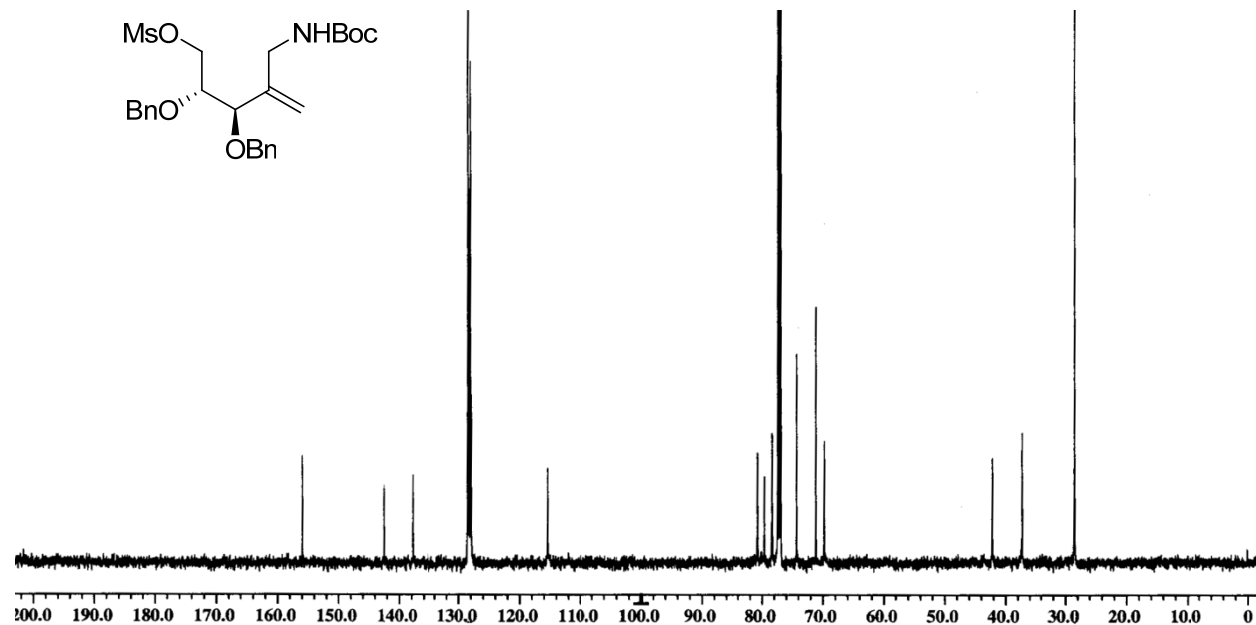

**Figure 40:** <sup>13</sup>C NMR (125 MHz) Spectrum of Compound 40

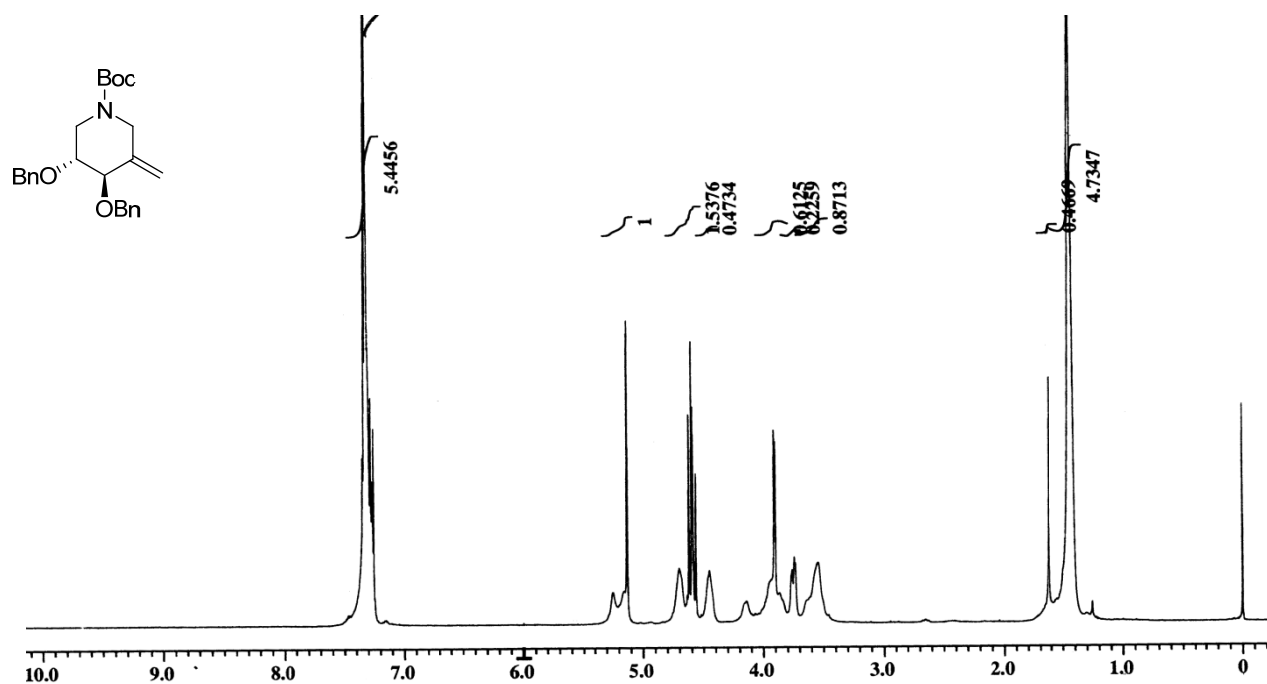

**Figure 41:** <sup>1</sup>H NMR (500 MHz) Spectrum of Compound 41

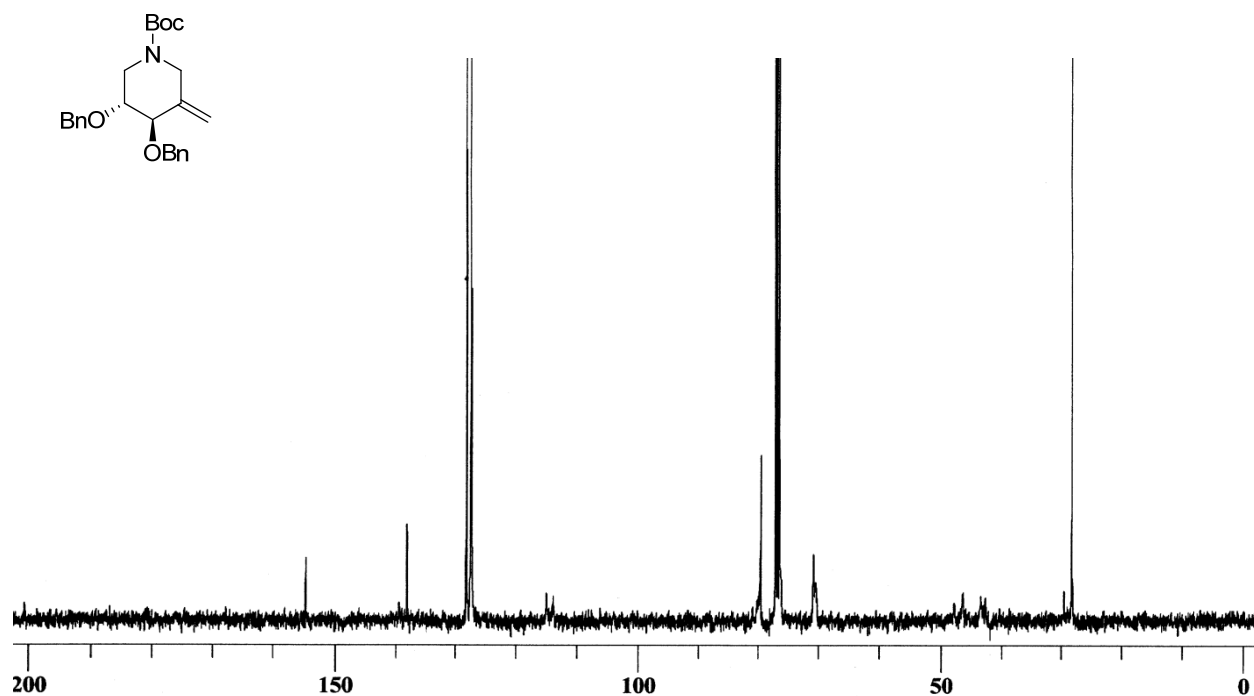

**Figure 42:** <sup>13</sup>C NMR (100 MHz) Spectrum of Compound 41



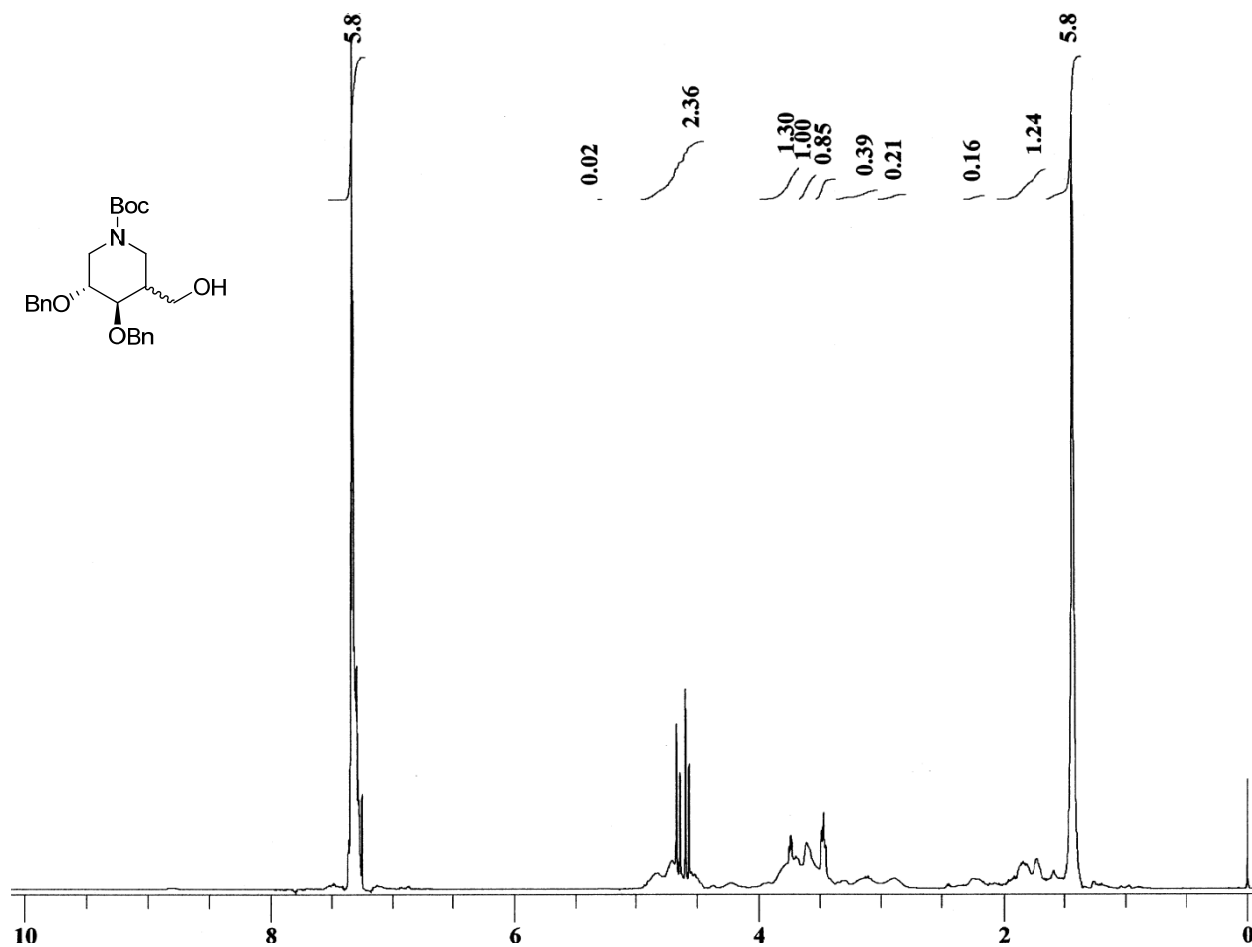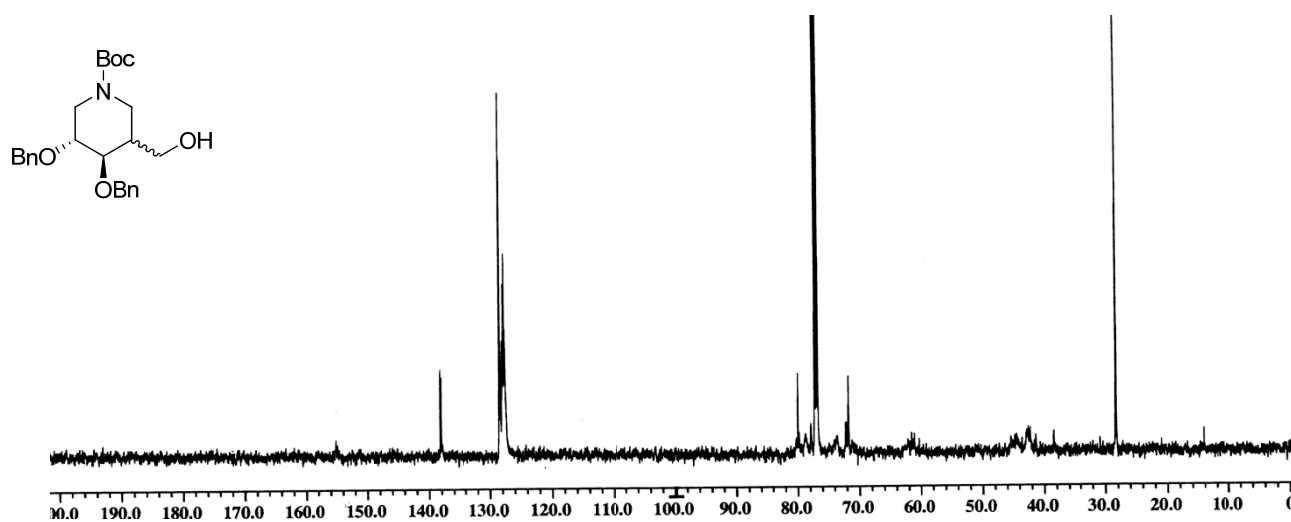

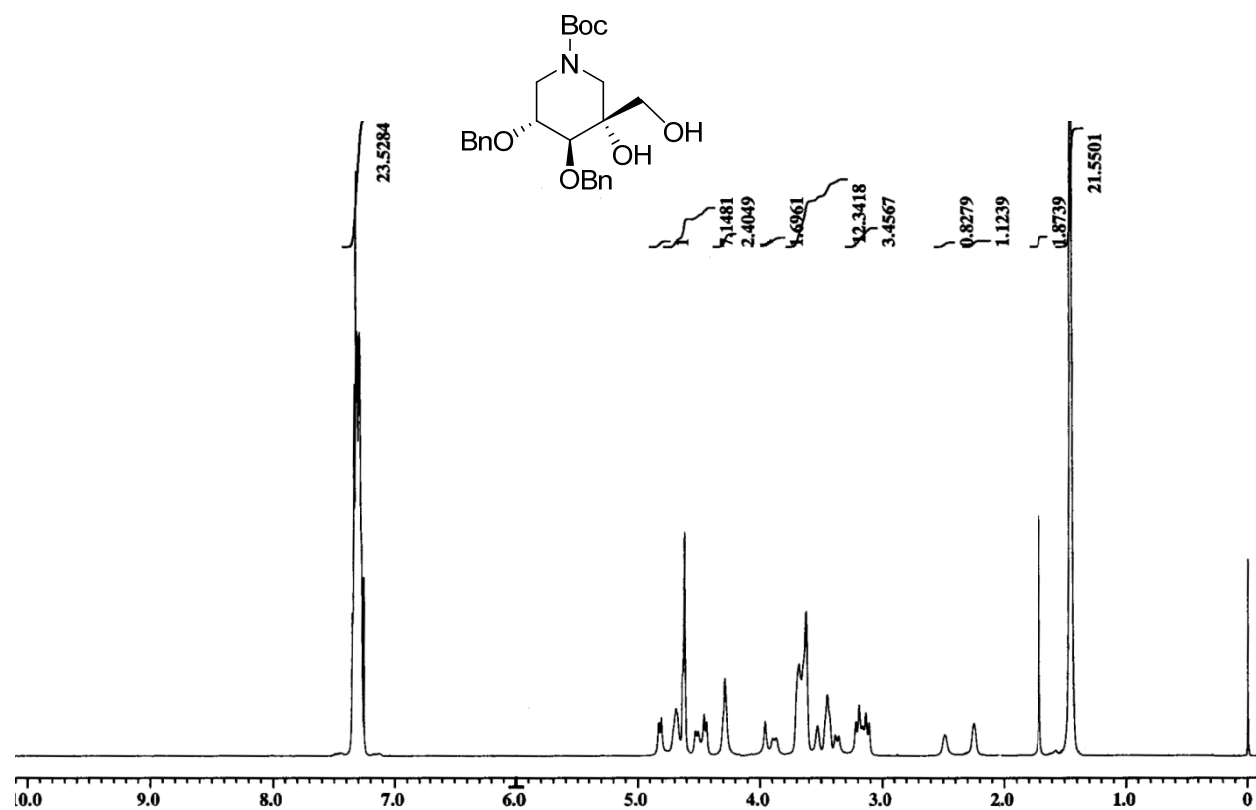

**Figure 45:** <sup>1</sup>H NMR (500 MHz) Spectrum of Compound 43

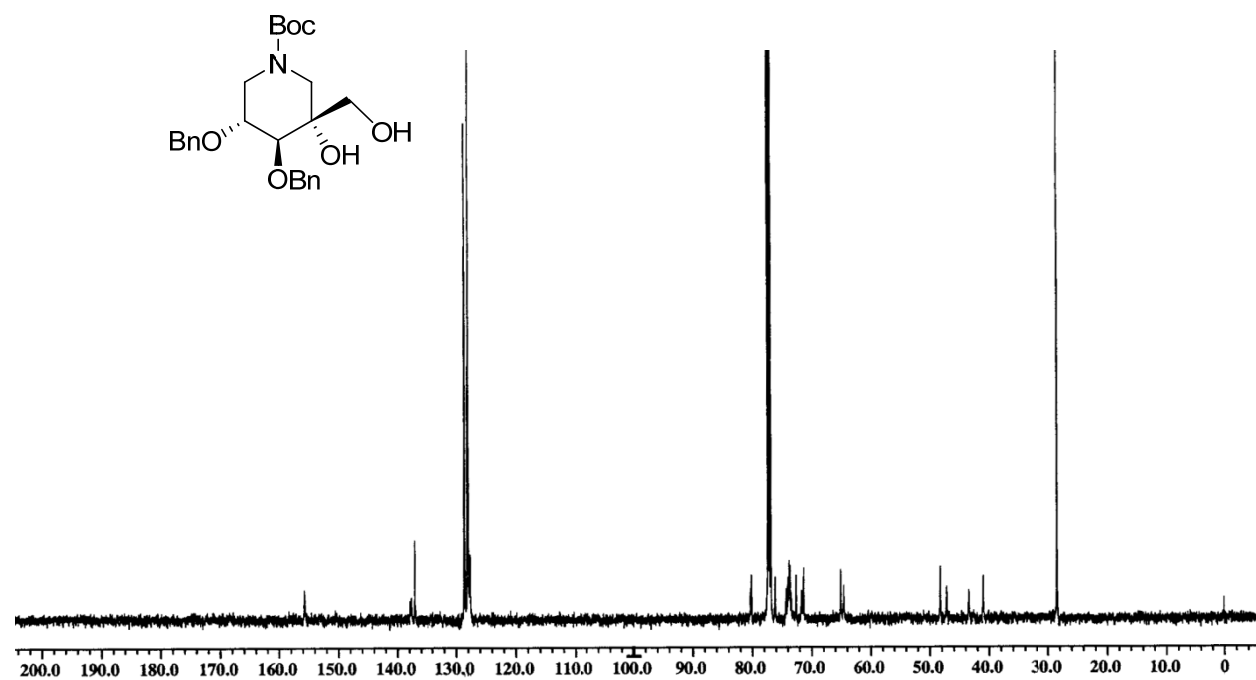

**Figure 46:** <sup>13</sup>C NMR (125 MHz) Spectrum of Compound 43

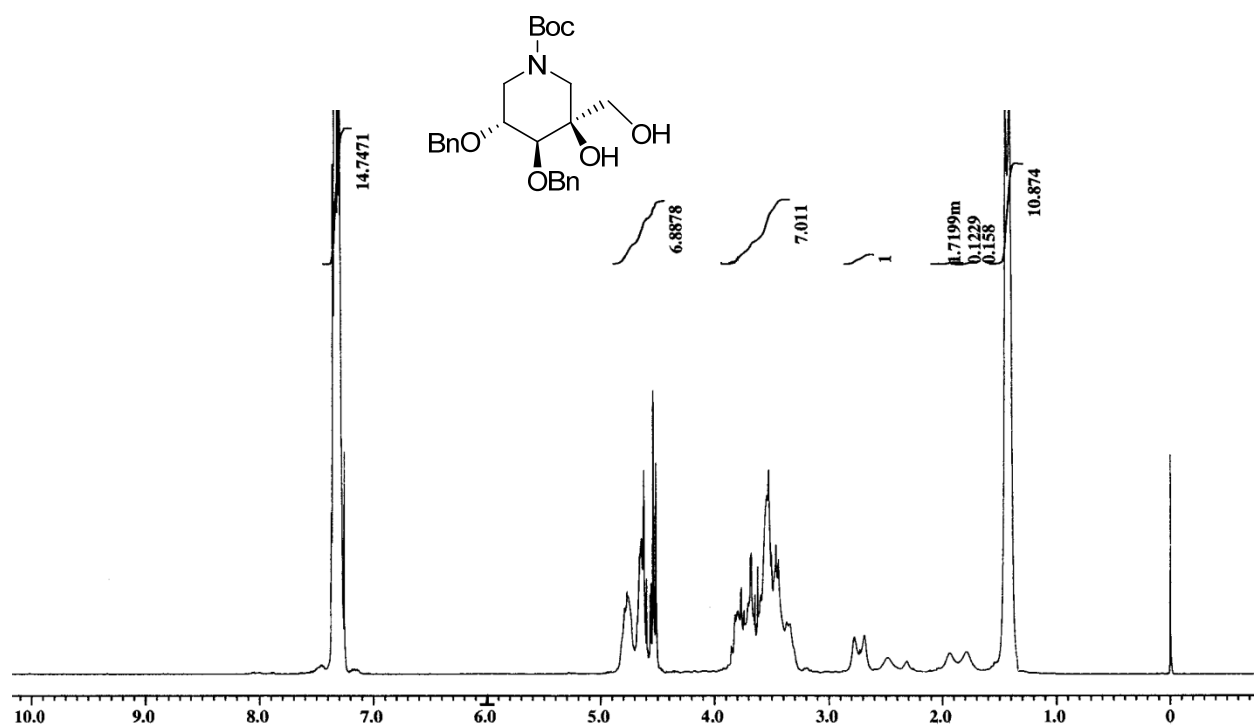

**Figure 47:** <sup>1</sup>H NMR (500 MHz) Spectrum of Compound 44

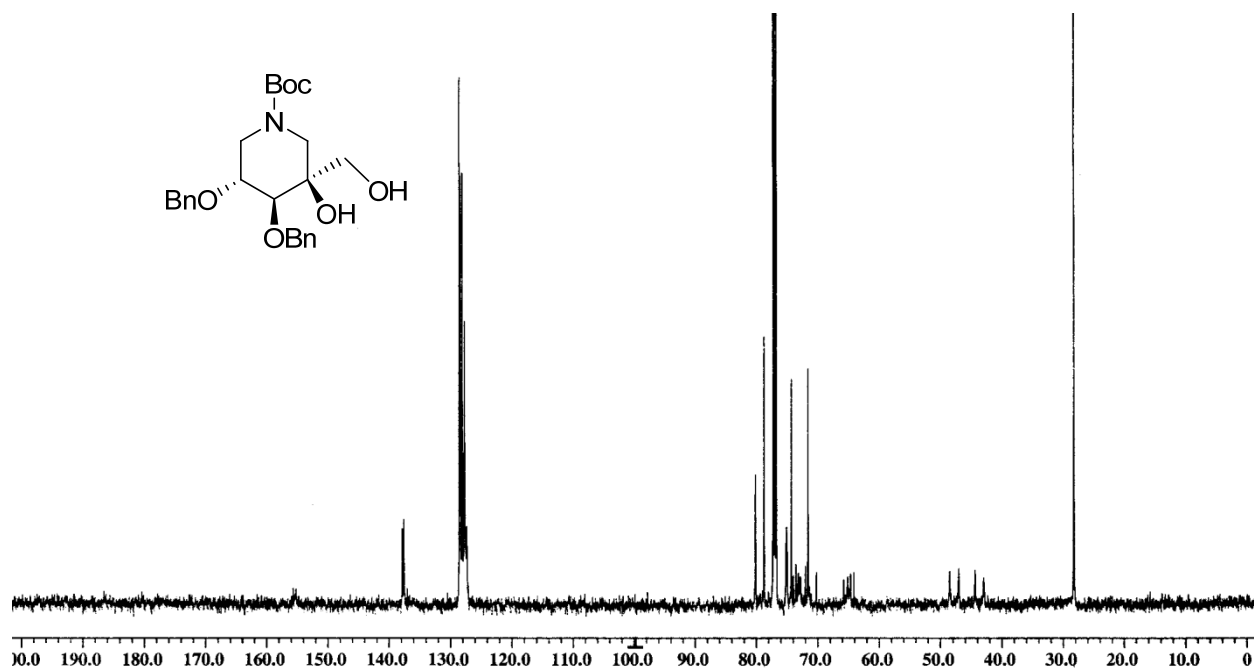

**Figure 48:** <sup>13</sup>C NMR (125 MHz) Spectrum of Compound 44

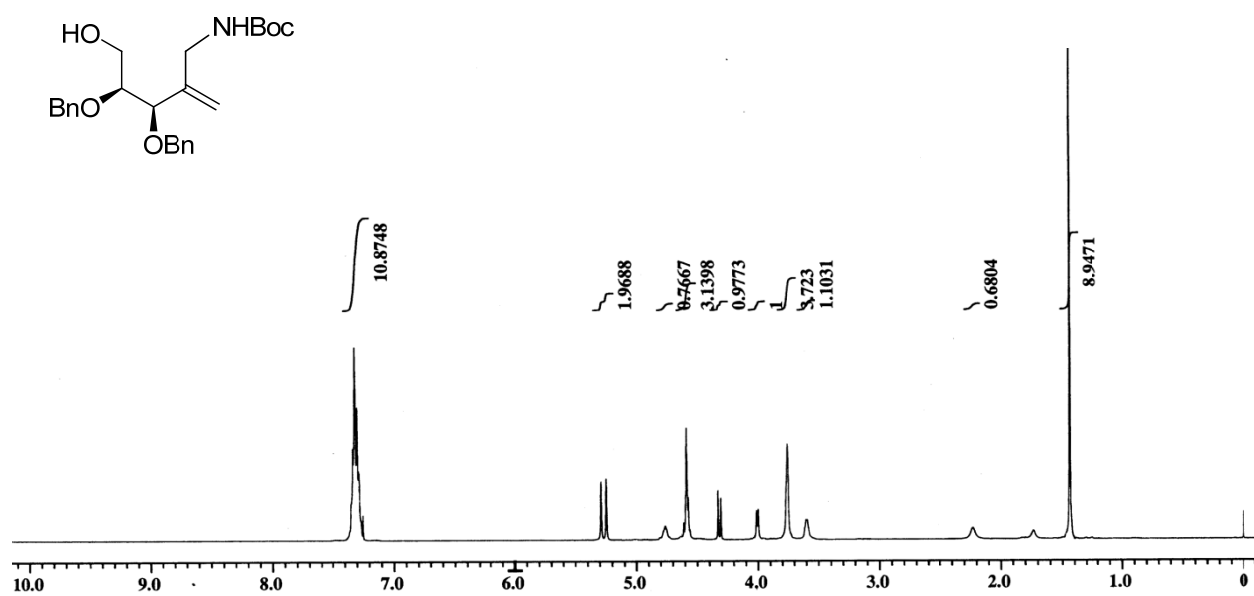

**Figure 49:** <sup>1</sup>H NMR (500 MHz) Spectrum of Compound 45

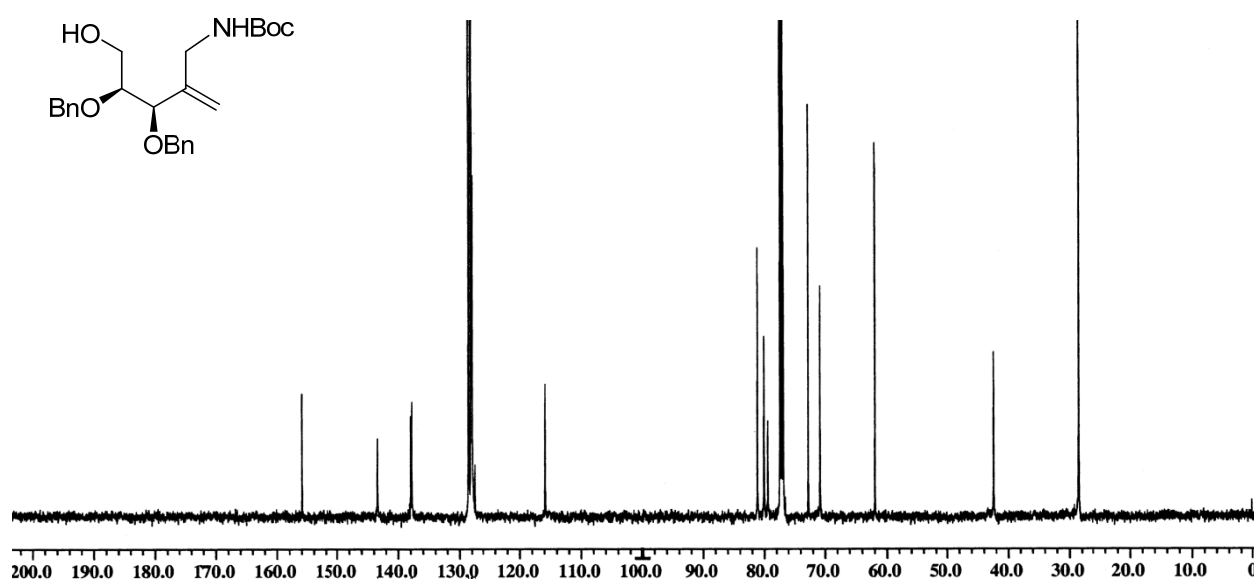

**Figure 50:** <sup>13</sup>C NMR (125 MHz) Spectrum of Compound 45

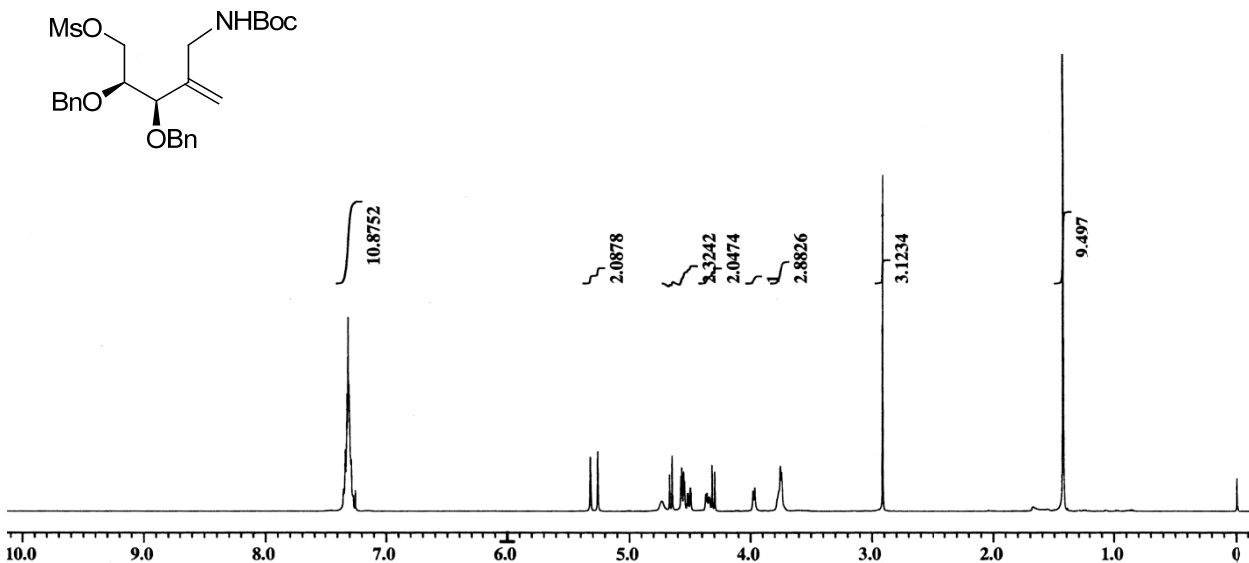

**Figure 51:**  $^1\text{H}$  NMR (500 MHz) Spectrum of Compound **46**

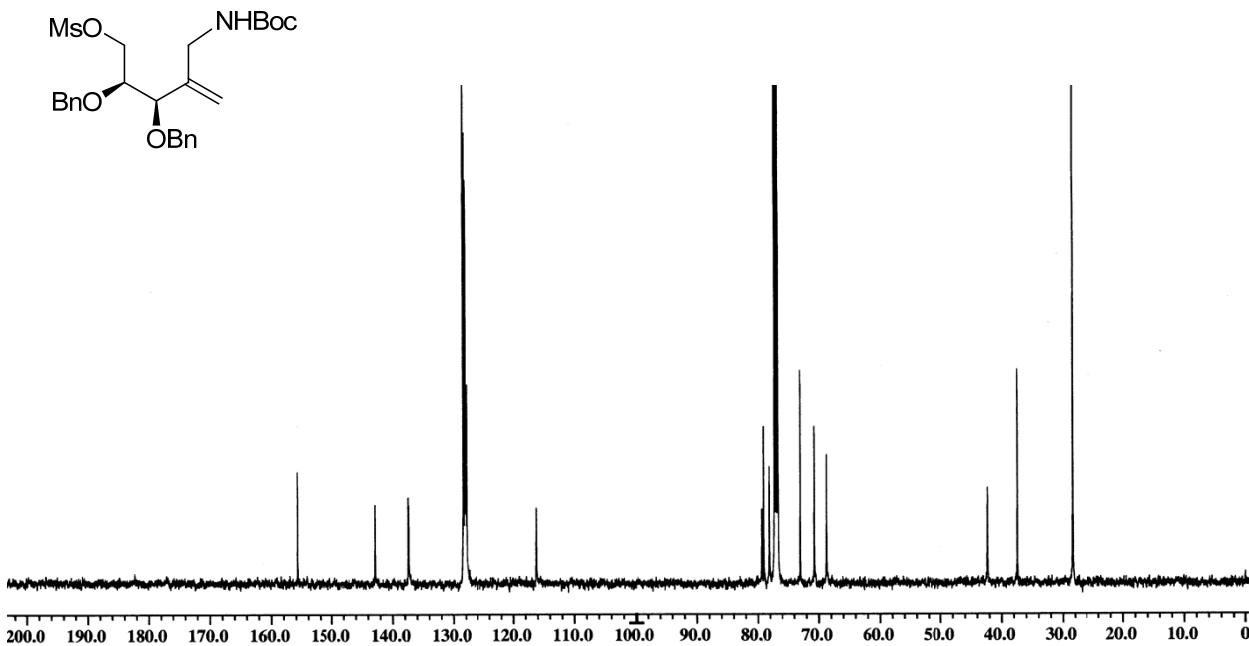

**Figure 52:**  $^{13}\text{C}$  NMR (125 MHz) Spectrum of Compound **46**

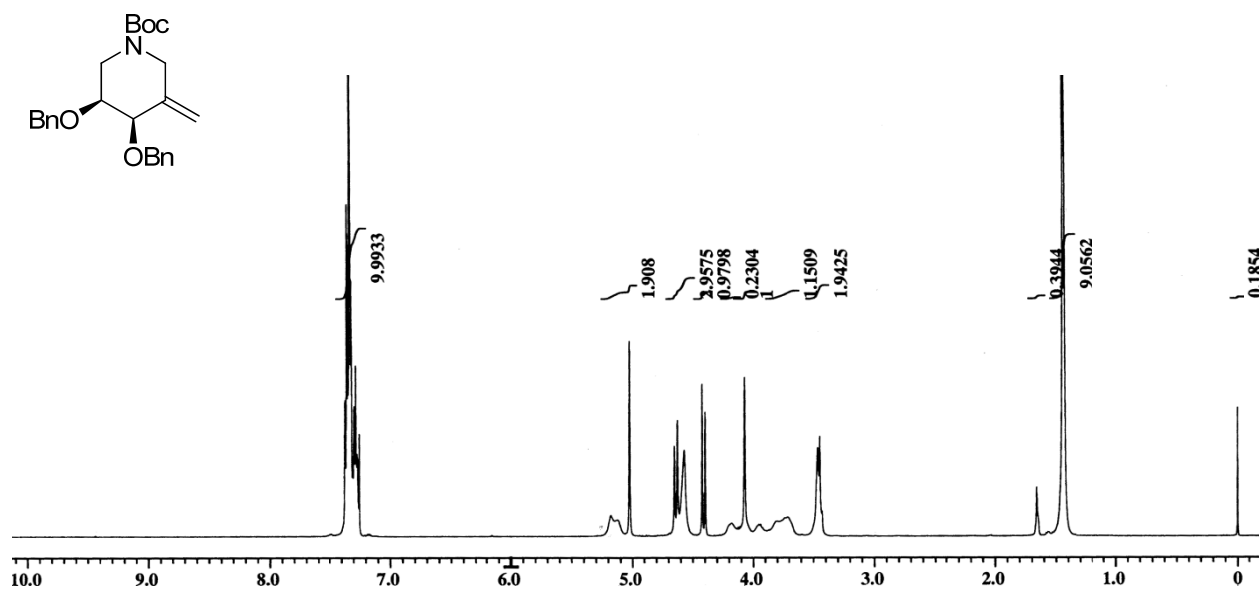

**Figure 53:** <sup>1</sup>H NMR (500 MHz) Spectrum of Compound 47

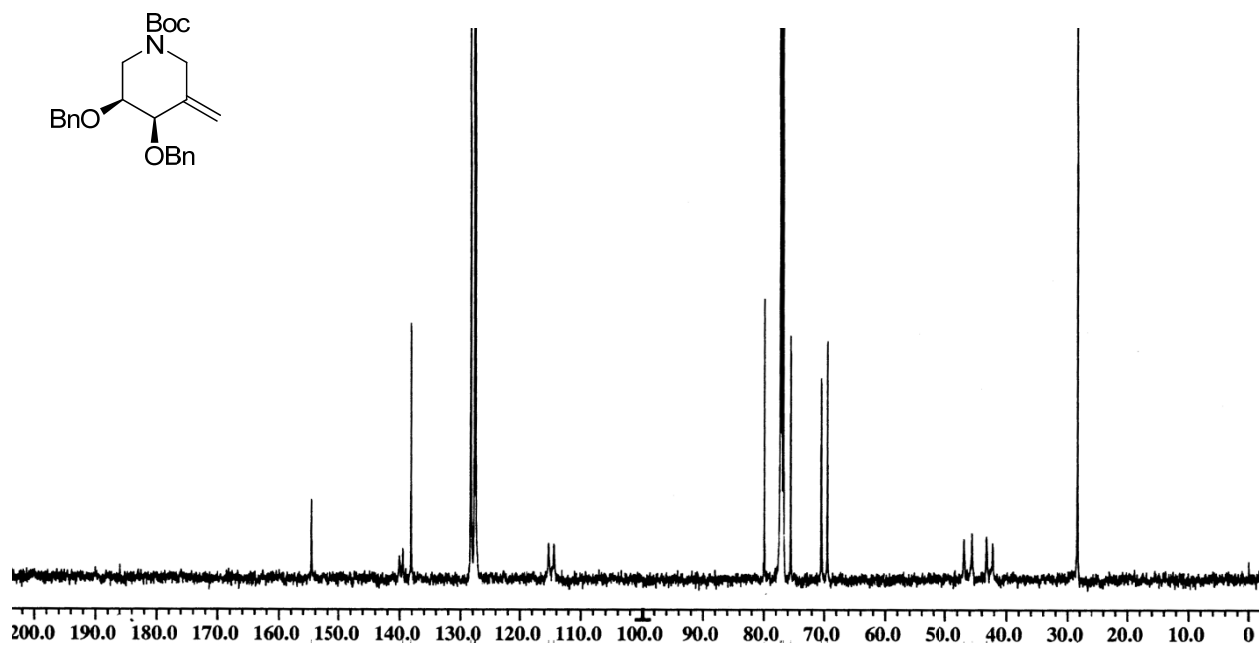

**Figure 54:** <sup>13</sup>C NMR (125 MHz) Spectrum of Compound 47

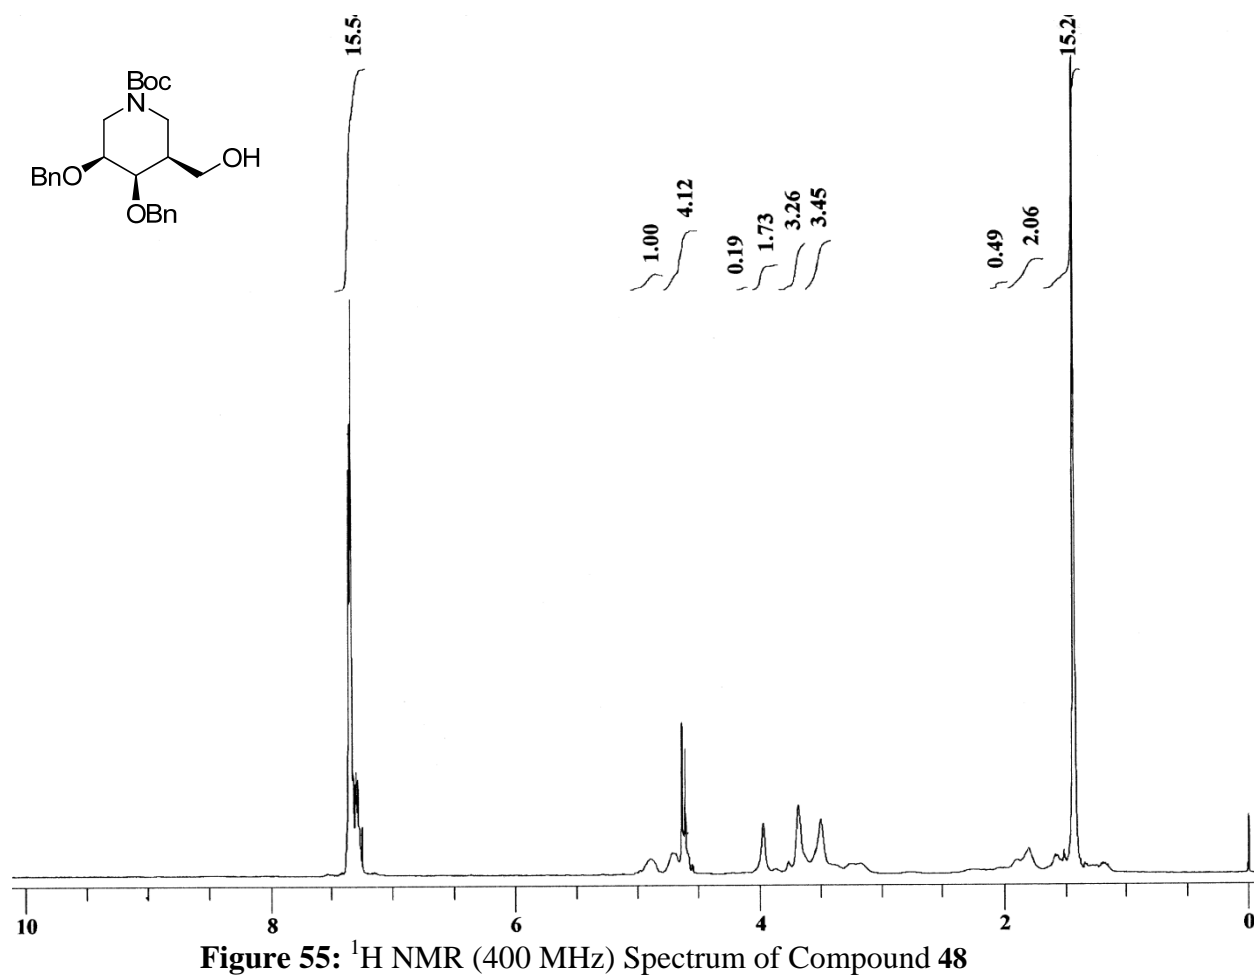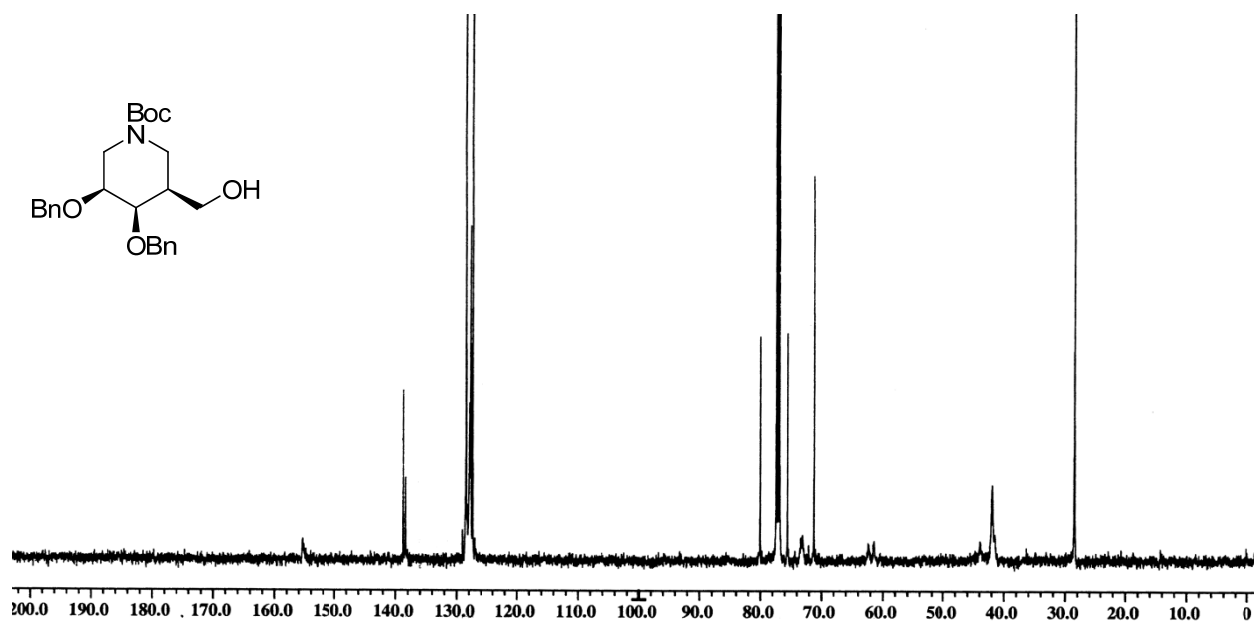

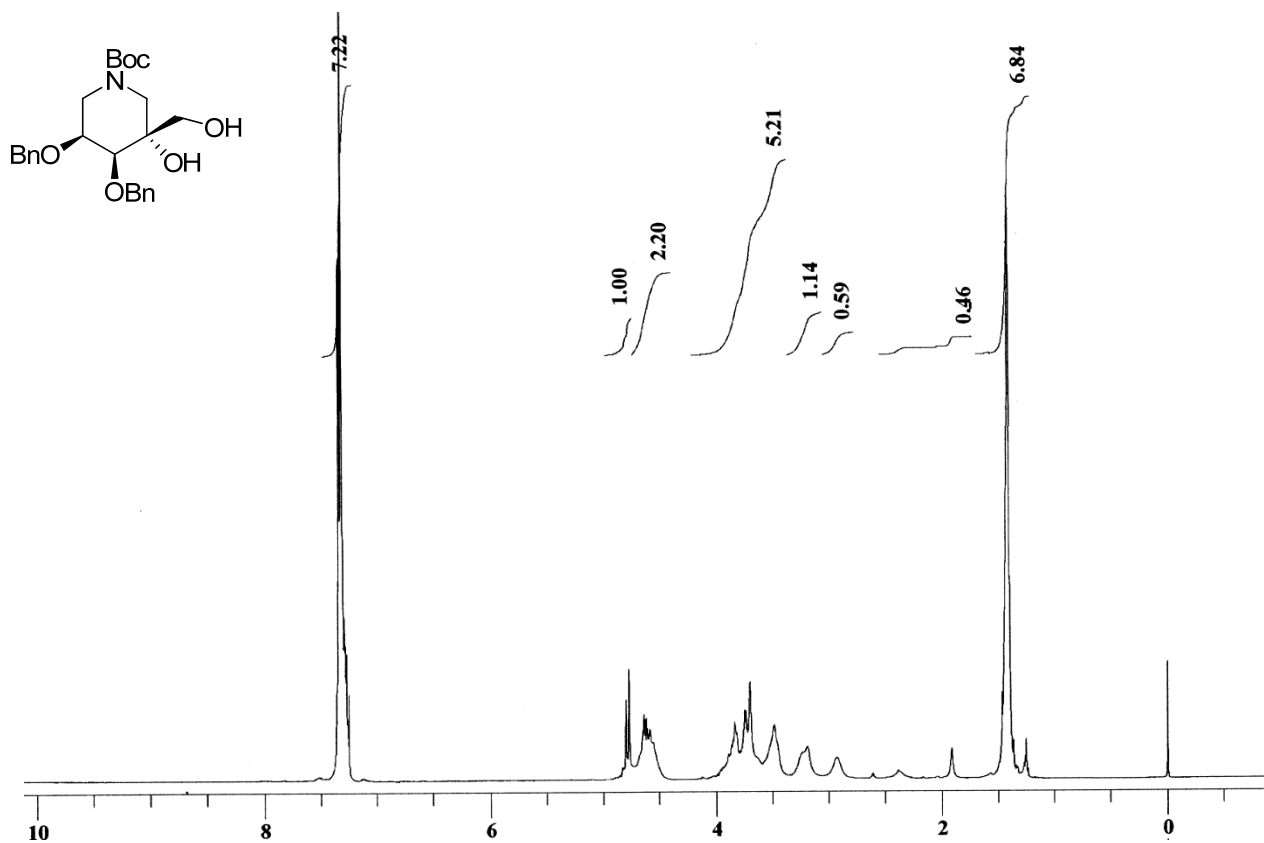

Figure 57: <sup>1</sup>H NMR (400 MHz) Spectrum of Compound 49

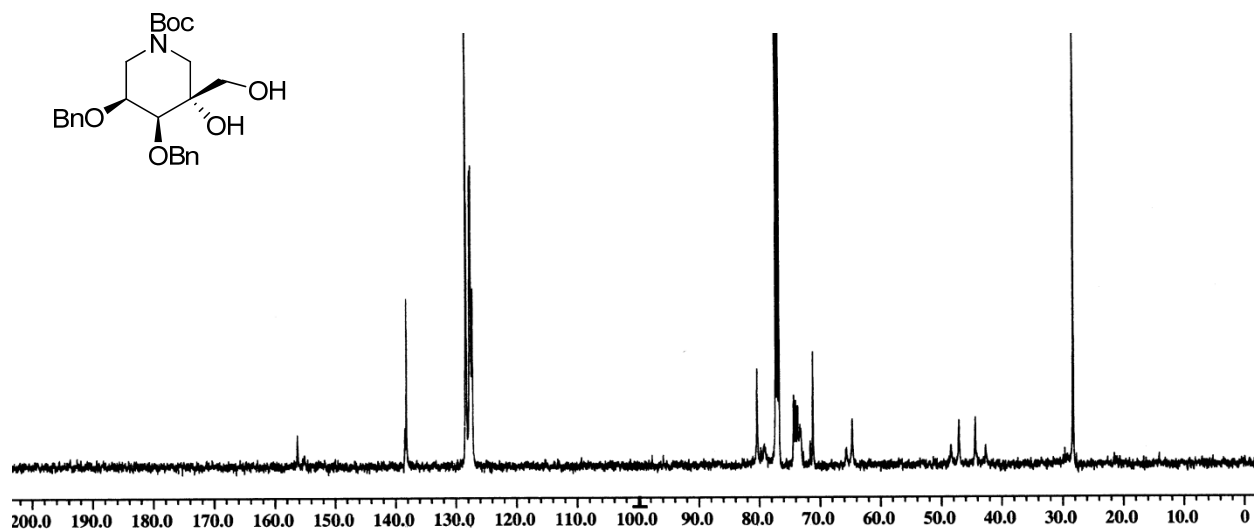

Figure 58: <sup>13</sup>C NMR (125 MHz) Spectrum of Compound 49



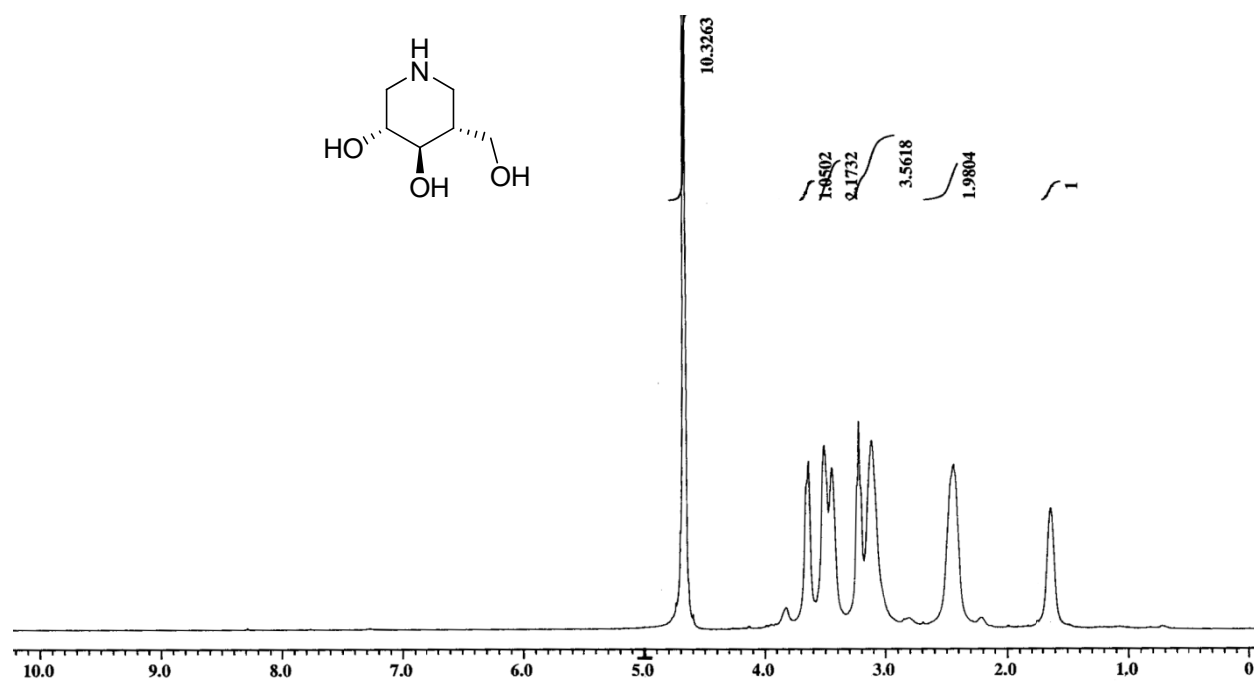

**Figure 59:** <sup>1</sup>H NMR (500 MHz) Spectrum of Compound 4A

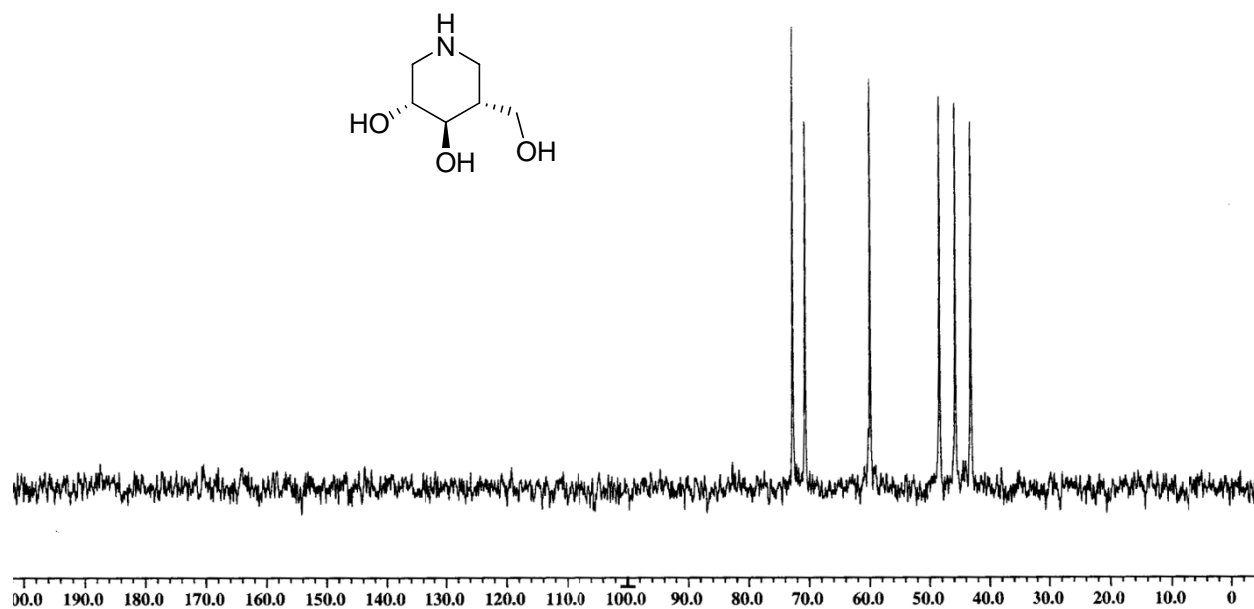

**Figure 60:** <sup>13</sup>C NMR (125 MHz) Spectrum of Compound 4A

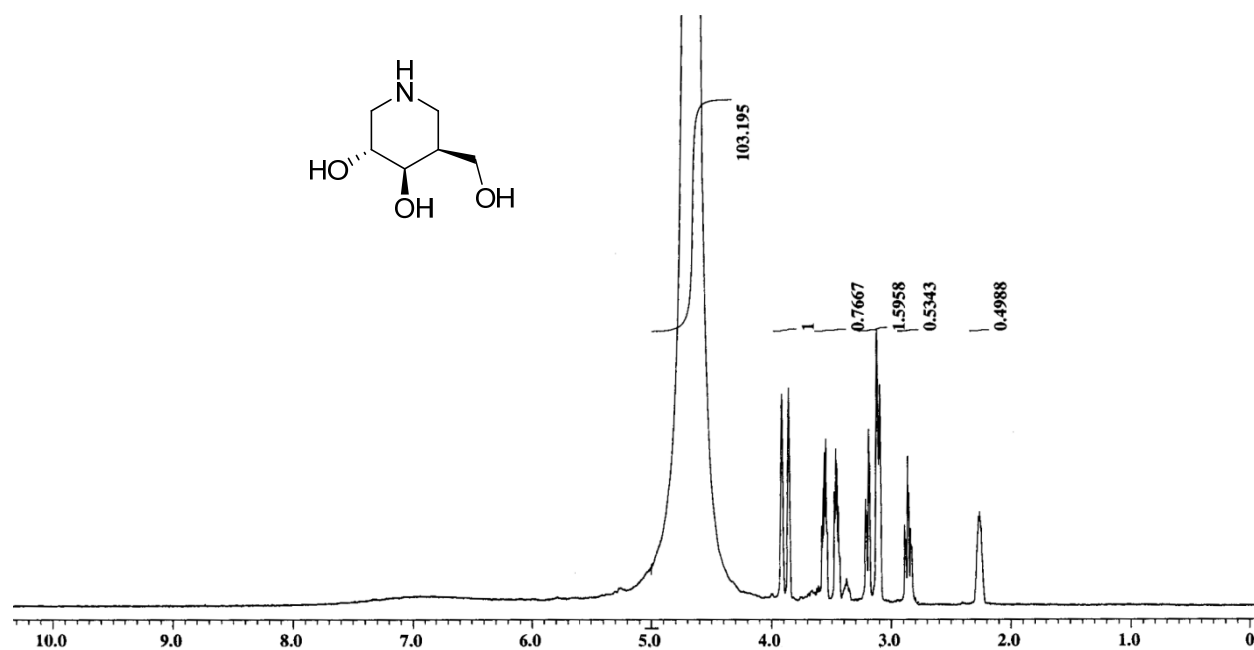

**Figure 61:** <sup>1</sup>H NMR (500 MHz) Spectrum of Compound **4B**

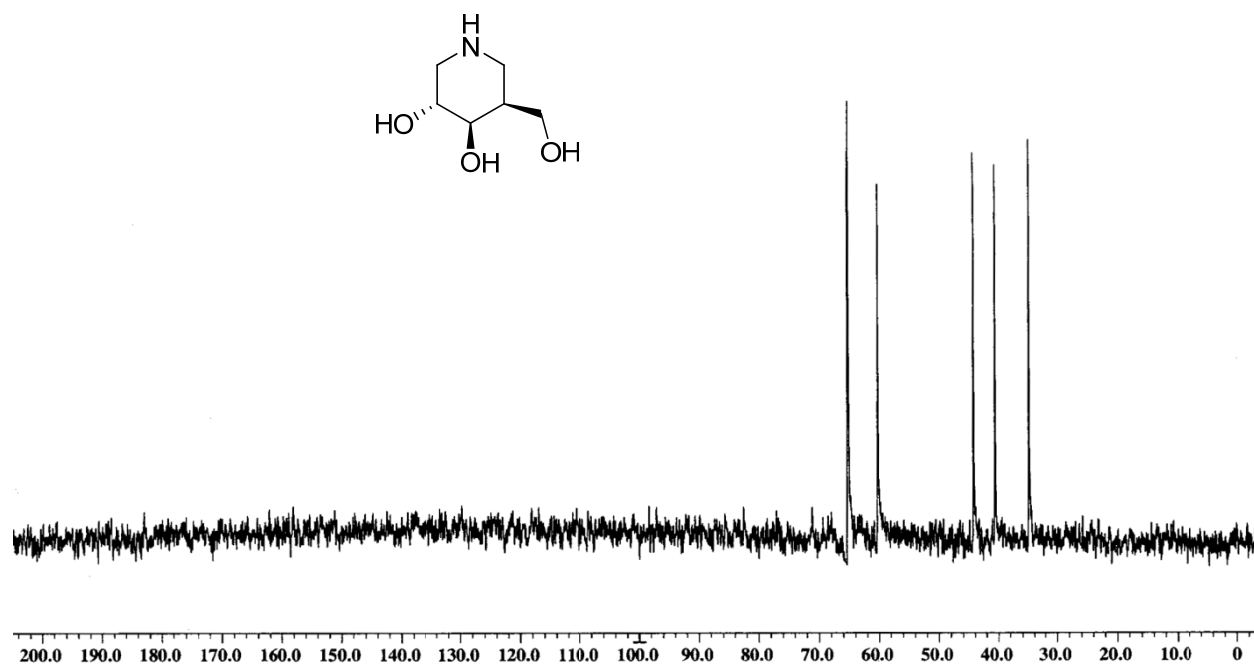

**Figure 62:** <sup>13</sup>C NMR (125 MHz) Spectrum of Compound **4B**

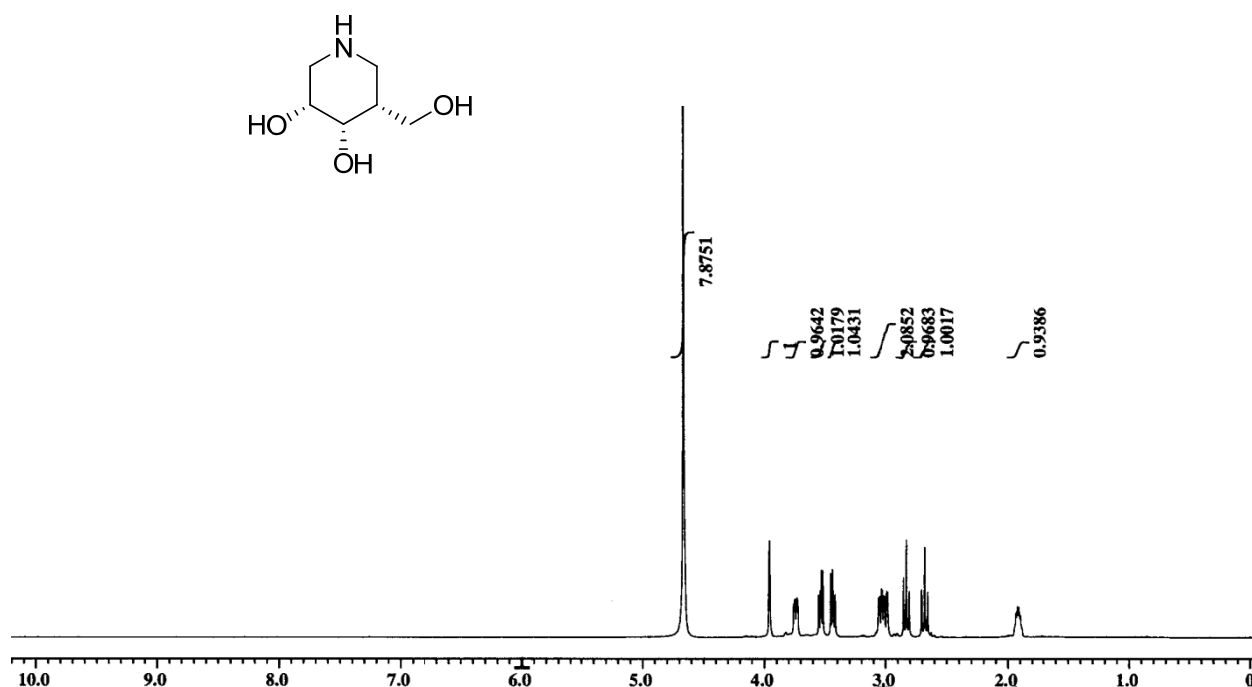

**Figure 63:**  $^1\text{H}$  NMR (500 MHz) Spectrum of Compound 5

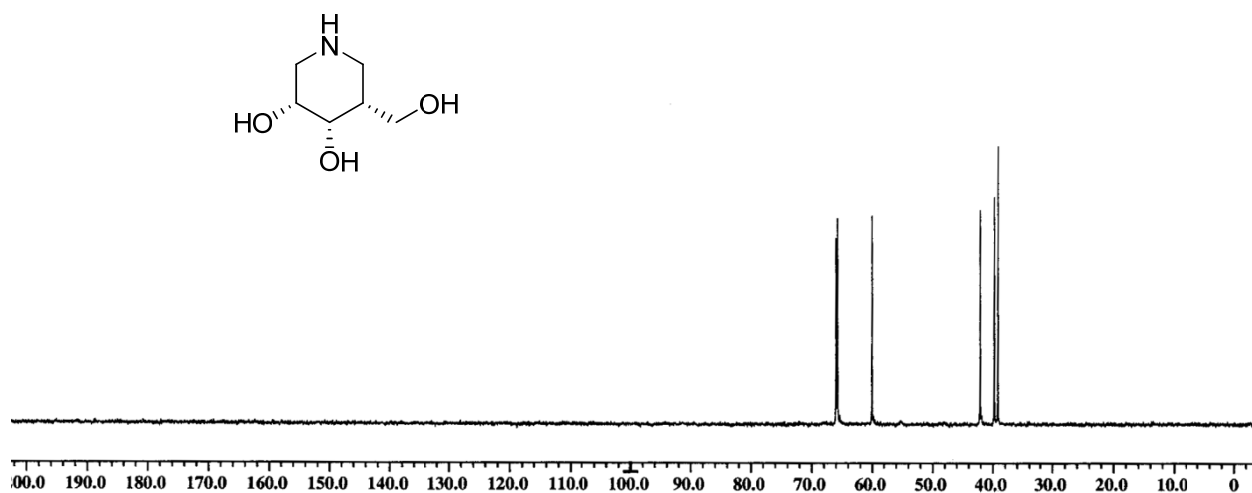

**Figure 64:**  $^{13}\text{C}$  NMR (125 MHz) Spectrum of Compound 5

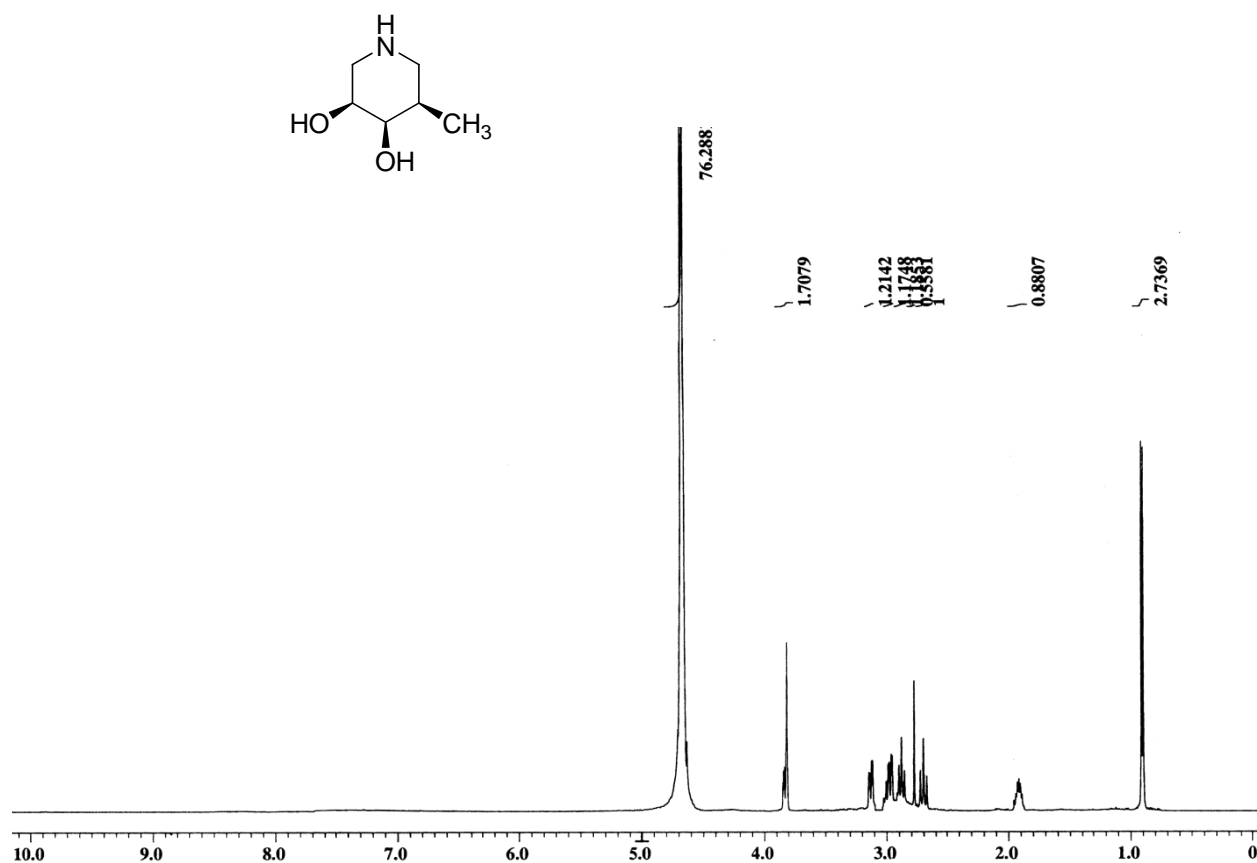

Figure 65: <sup>1</sup>H NMR (500 MHz) Spectrum of Compound 6

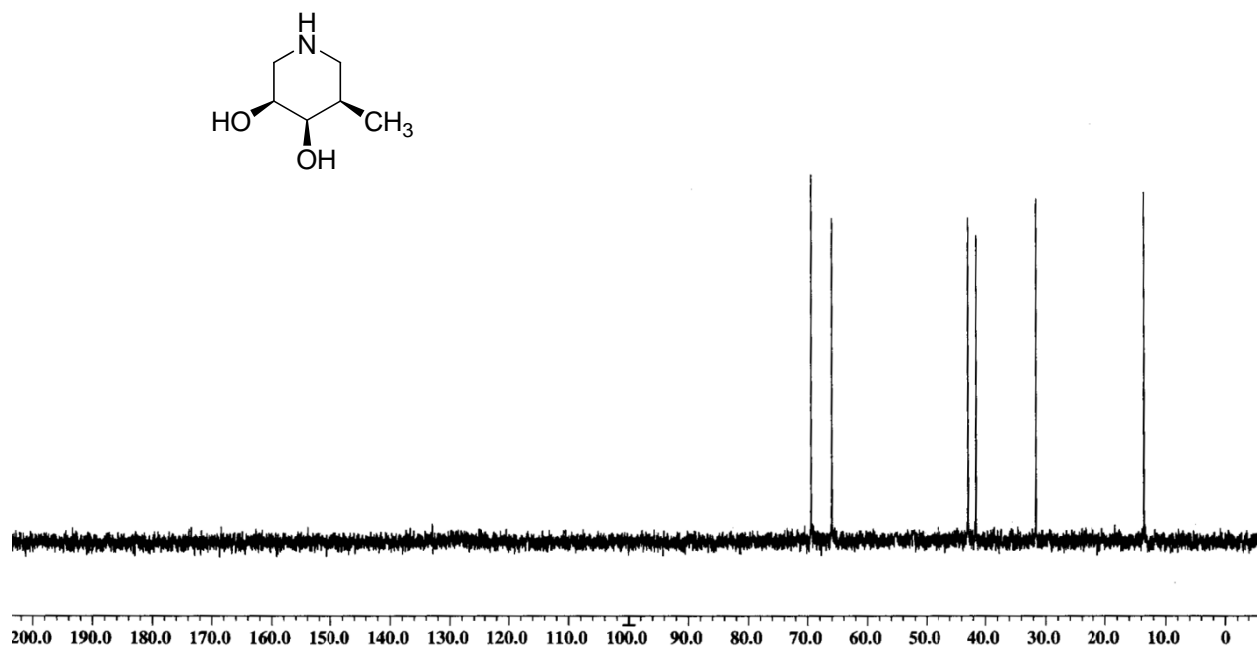

Figure 66: <sup>13</sup>C NMR (125 MHz) Spectrum of Compound 6

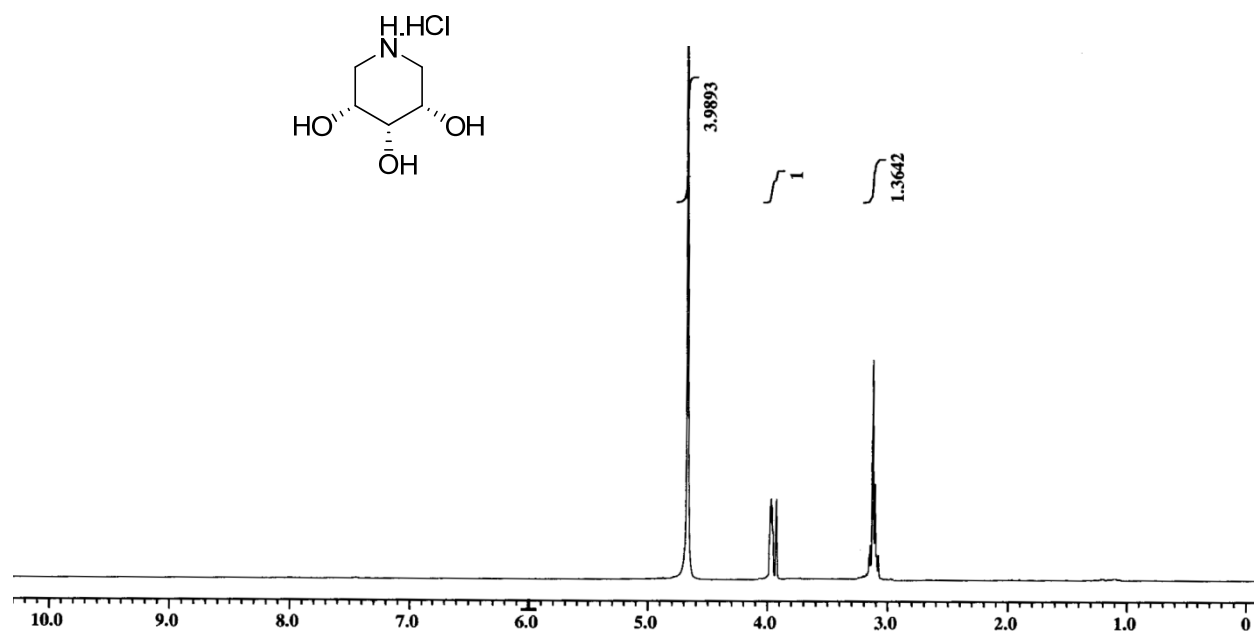

**Figure 67:** <sup>1</sup>H NMR (500 MHz) Spectrum of Compound 7

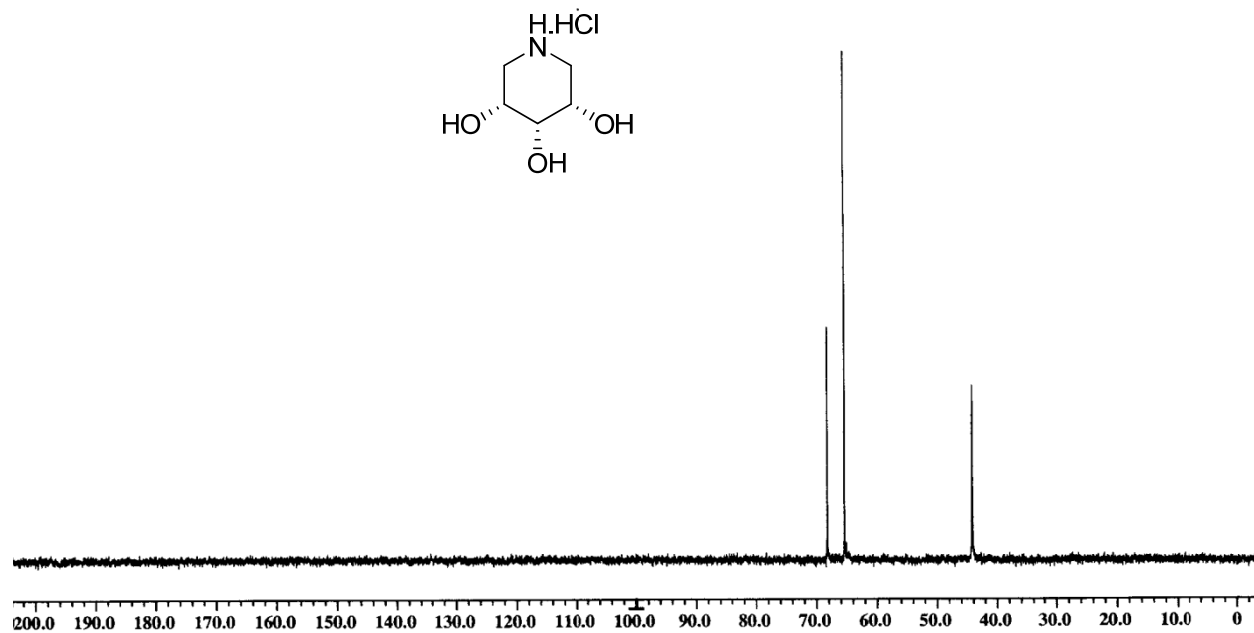

**Figure 68:** <sup>13</sup>C NMR (125 MHz) Spectrum of Compound 7

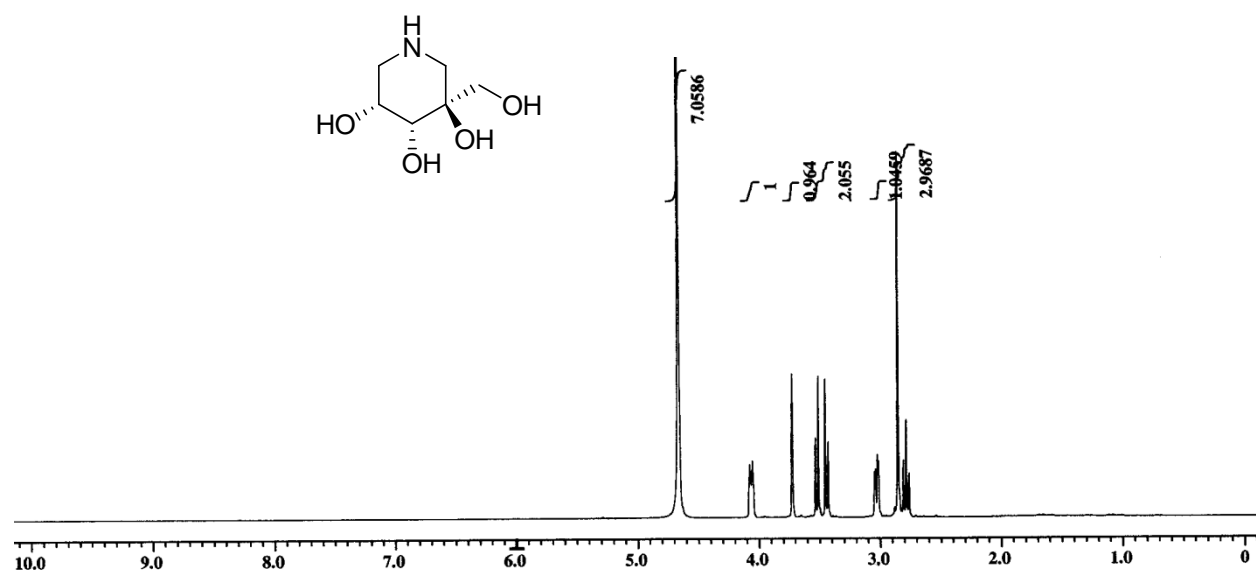

Figure 69: <sup>1</sup>H NMR (500 MHz) Spectrum of Compound 8

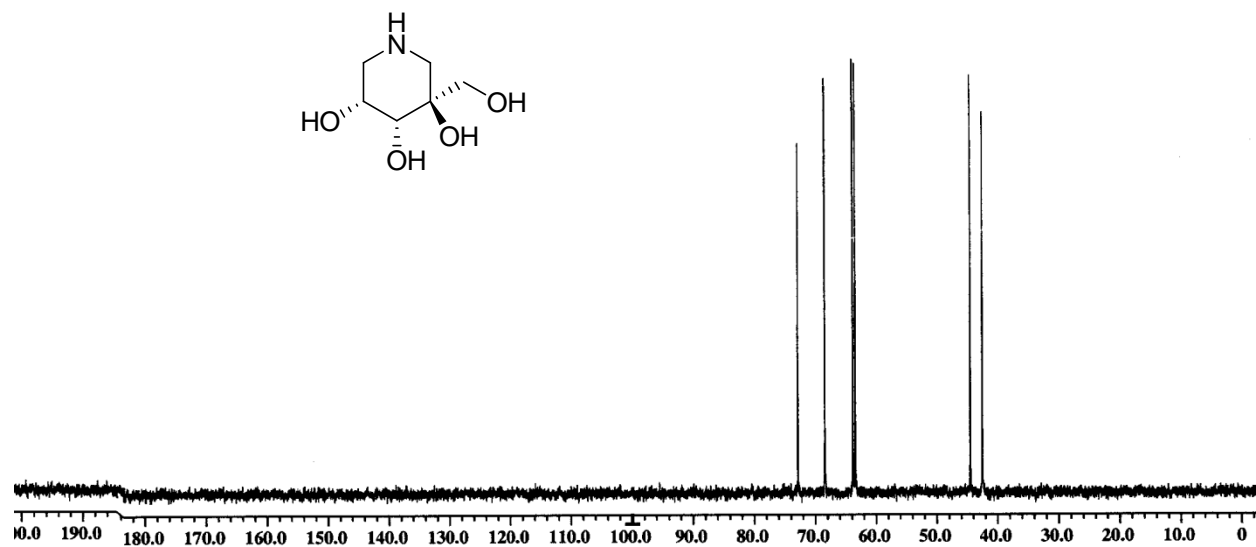

Figure 70: <sup>13</sup>C NMR (125 MHz) Spectrum of Compound 8

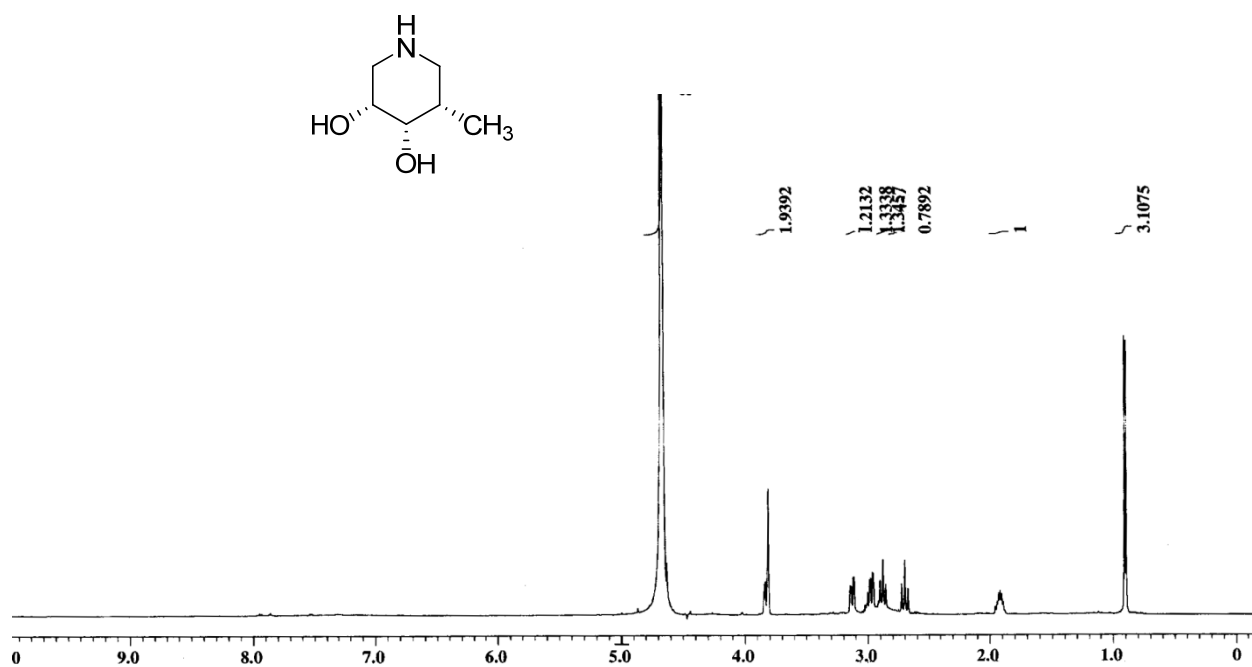

**Figure 71:** <sup>1</sup>H NMR (500 MHz) Spectrum of Compound 9

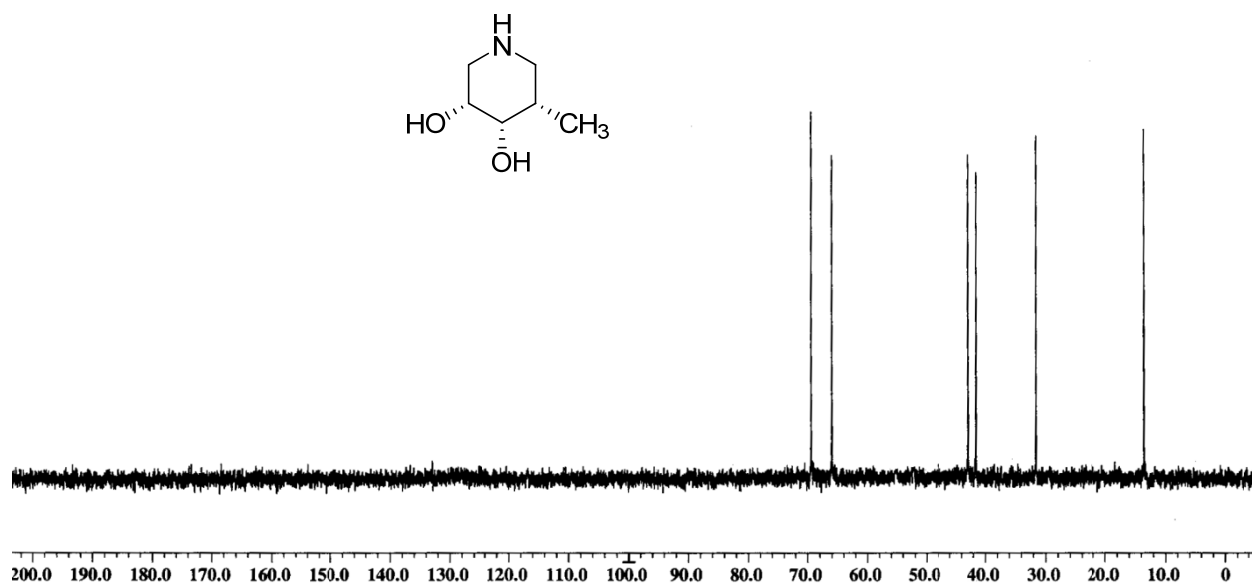

**Figure 72:** <sup>13</sup>C NMR (125 MHz) Spectrum of Compound 9

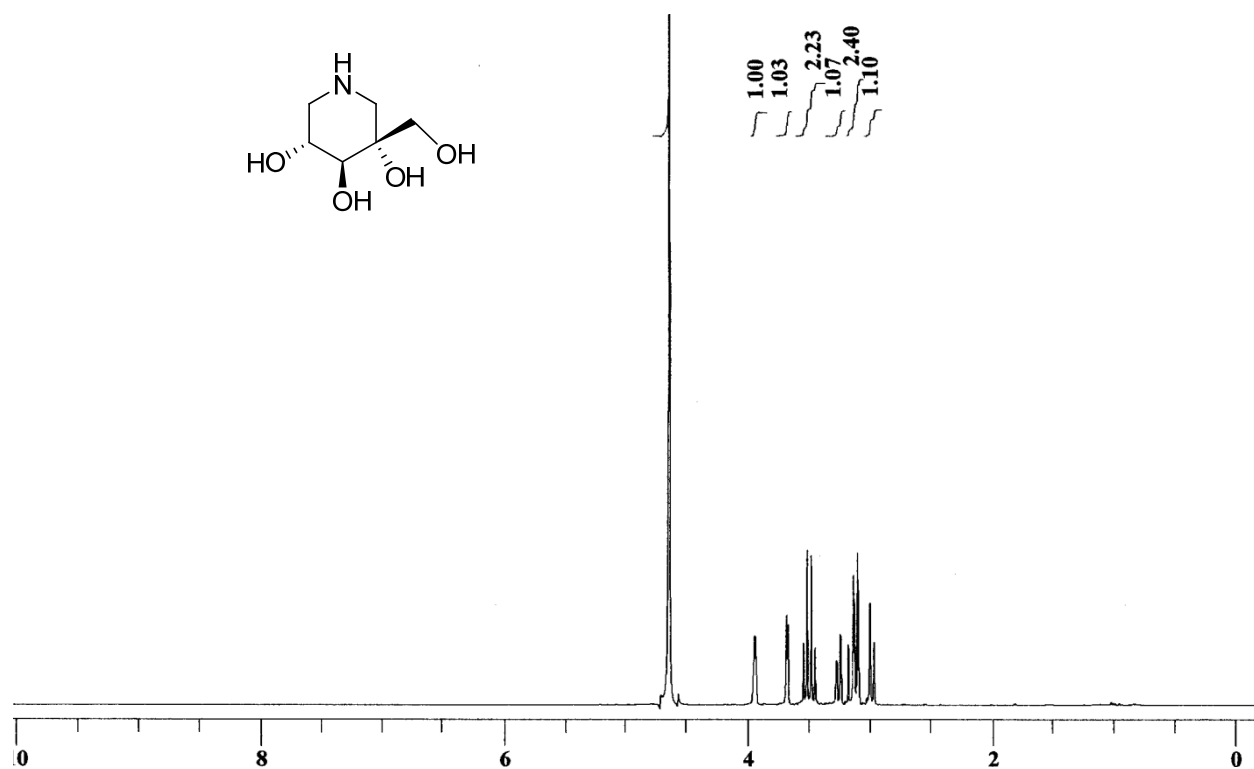

**Figure 73:**  $^1\text{H}$  NMR (400 MHz) Spectrum of Compound 10

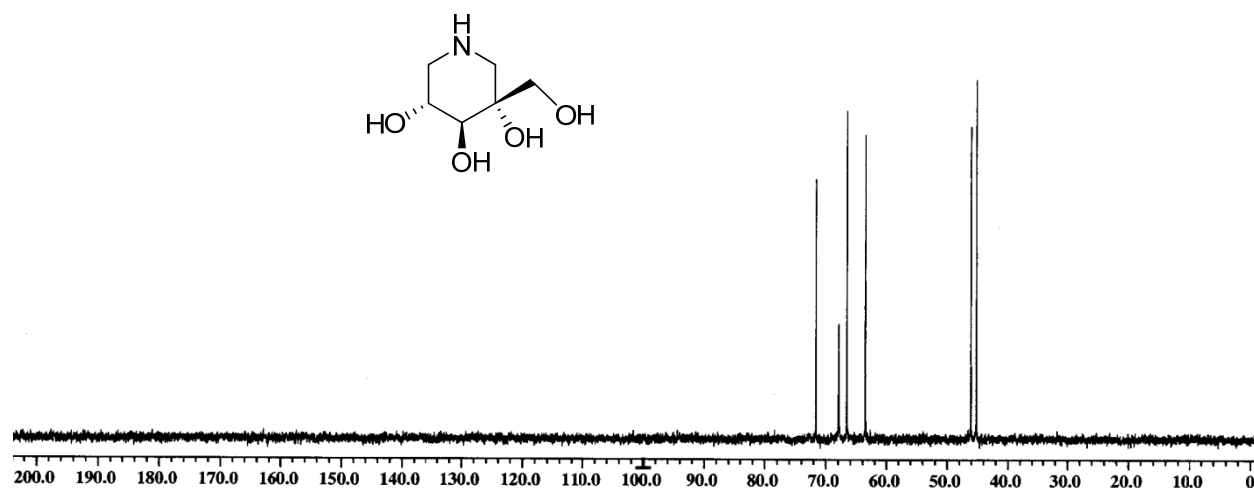

**Figure 74:**  $^{13}\text{C}$  NMR (125 MHz) Spectrum of Compound 10



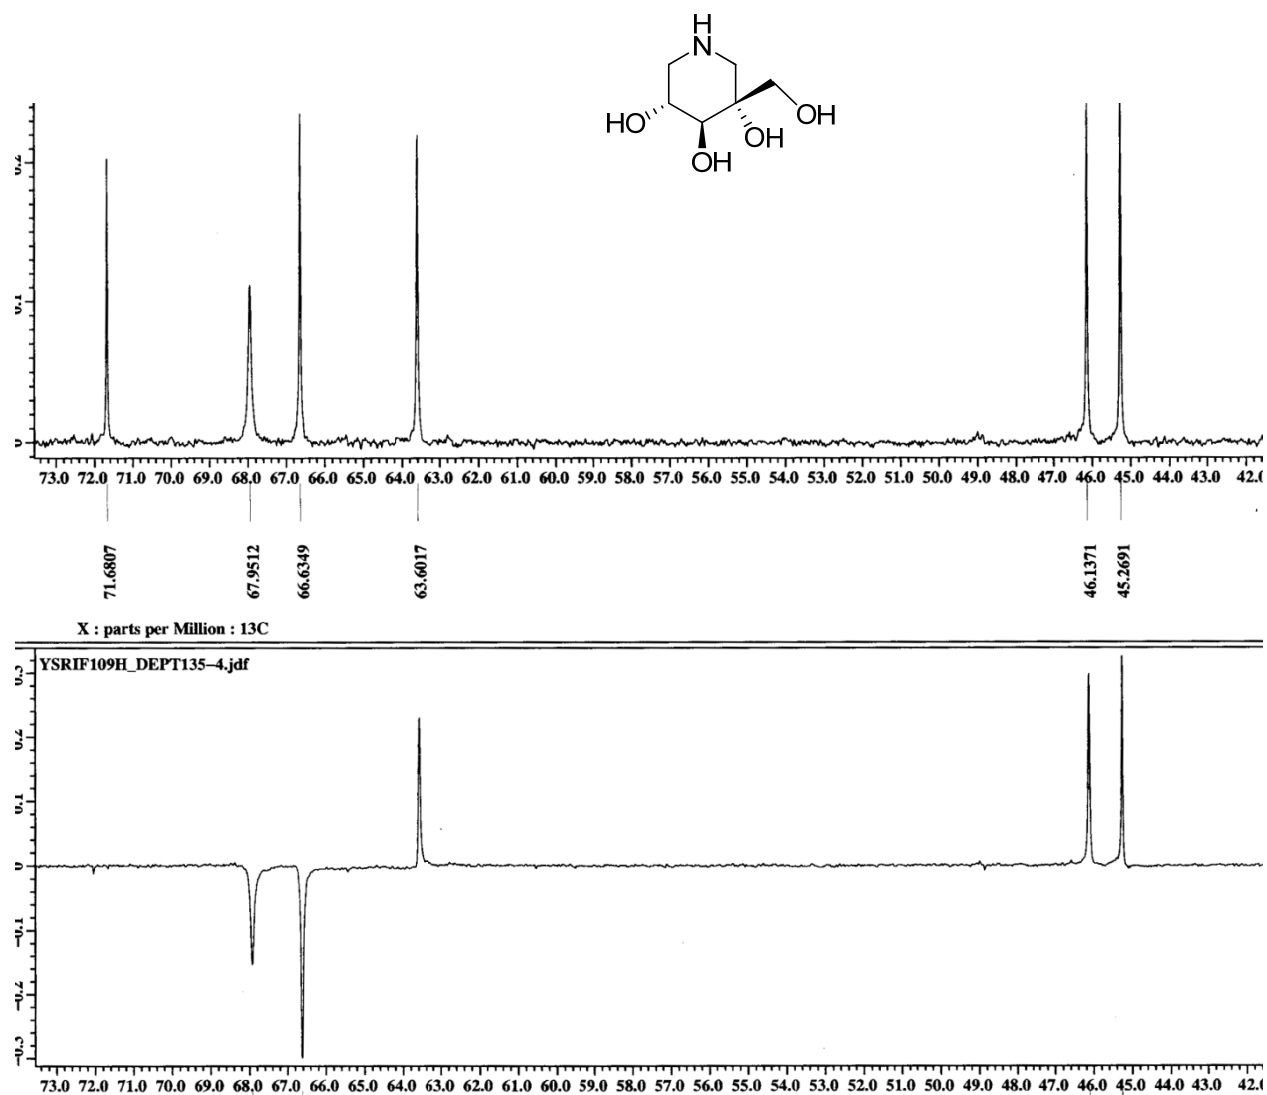

**Figure 75:** DEPT (125 MHz) Spectrum of Compound **10**

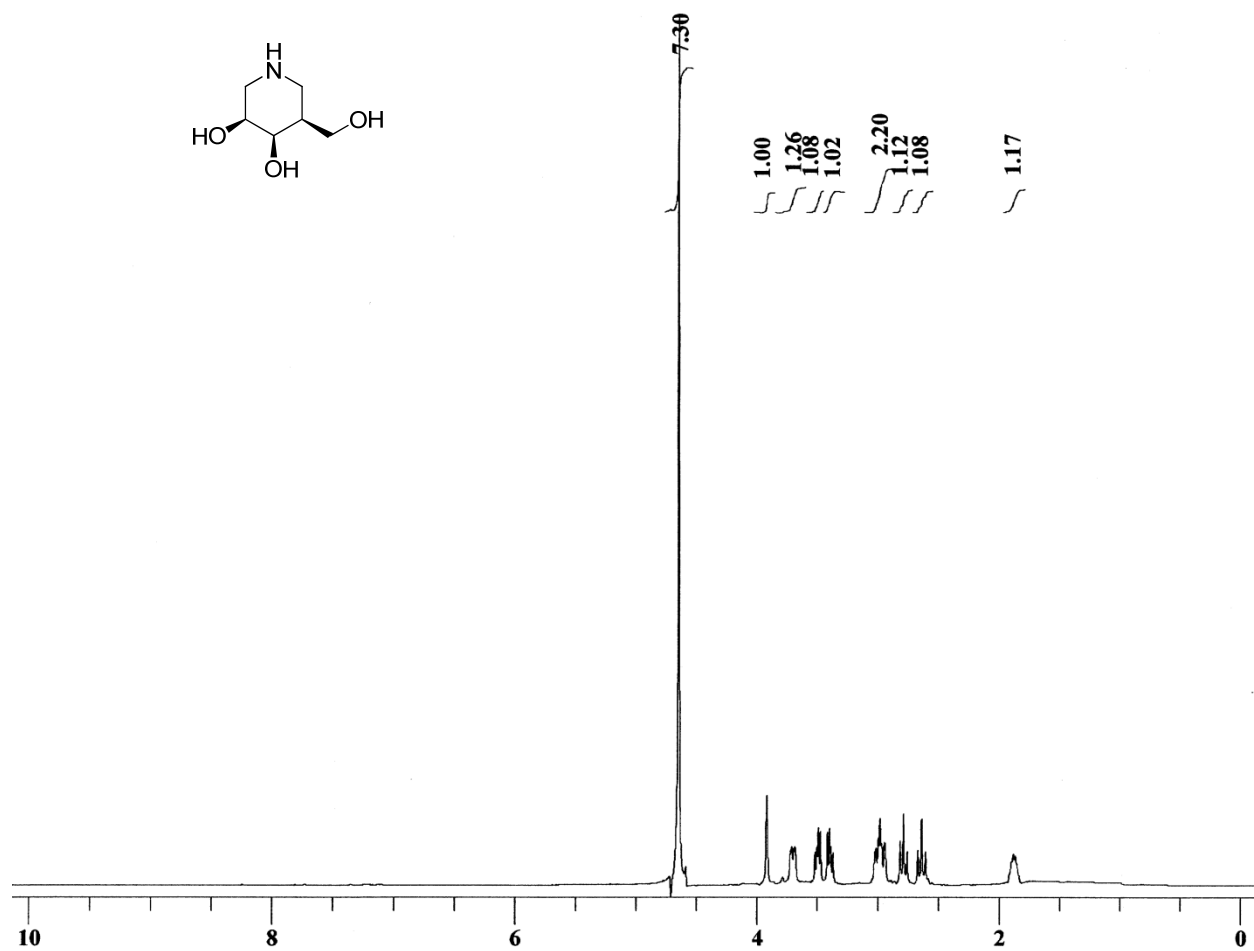

Figure 76: <sup>1</sup>H NMR (400 MHz) Spectrum of Compound 11

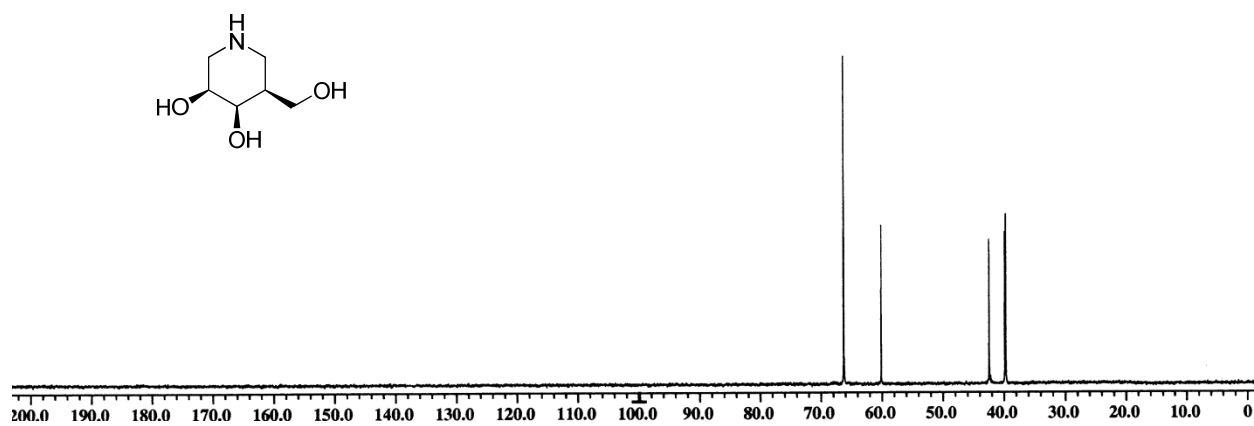

Figure 77: <sup>13</sup>C NMR (125 MHz) Spectrum of Compound 11

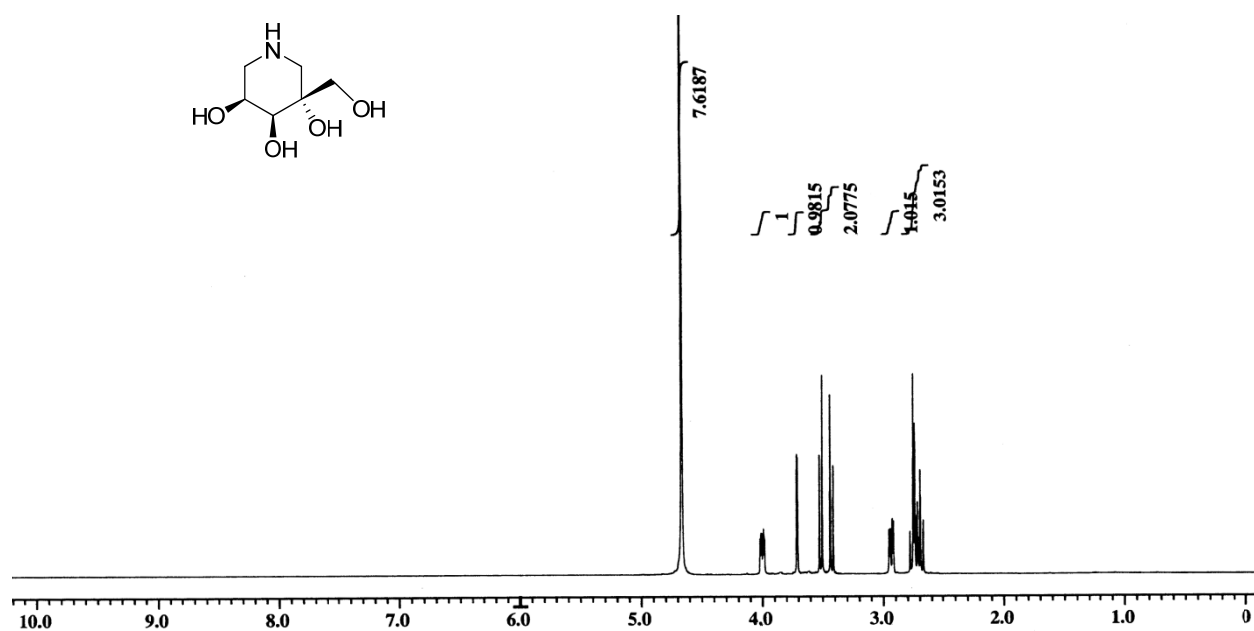

**Figure 78:** <sup>1</sup>H NMR (500 MHz) Spectrum of Compound 12

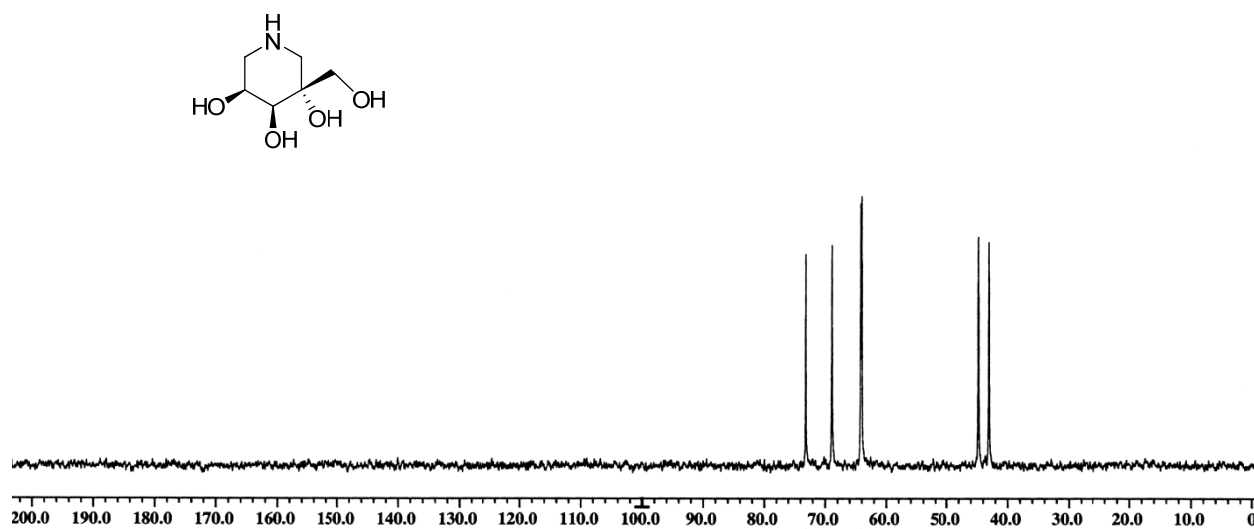

**Figure 79:** <sup>13</sup>C NMR (125 MHz) Spectrum of Compound 12
